# Supplementary material for: Blood Metabolite Signature of Metabolic Syndrome Implicates Alterations in Amino Acid Metabolism: Findings from the Baltimore Longitudinal Study of Aging (BLSA) and the Tsuruoka Metabolomics Cohort Study (TMCS)
Source: PubMed Central journal article supplement (PMC7072861; doi:10.3390/ijms21041249), 2020-02-13
Supplement: ijms-21-01249-s001.pdf [file ijms-21-01249-s001.pdf]

## Supplementary Tables

Supplementary Table 1. Metabolite classifications from the Human Metabolome Database.

Class and subclass were identified through a search of the HMDB database using the metabolite name or known alternate names for each metabolite.

| Metabolite        | Class                               | Subclass                             |
|-------------------|-------------------------------------|--------------------------------------|
| triethanolamine   | Amines                              | Alkanolamines                        |
| terephthalate     | Benzene and substituted derivatives | Benzoic acids and derivatives        |
| hippurate         | Benzene and substituted derivatives | Benzoic acids and derivatives        |
| Aminoisobutyrate  | Carboxylic acids and derivatives    | Amino acids, peptides, and analogues |
| thr               | Carboxylic acids and derivatives    | Amino acids, peptides, and analogues |
| gly               | Carboxylic acids and derivatives    | Amino acids, peptides and analogues  |
| betaala           | Carboxylic acids and derivatives    | Amino acids, peptides, and analogues |
| ala               | Carboxylic acids and derivatives    | Amino acids, peptides, and analogues |
| sarcosine         | Carboxylic acids and derivatives    | Amino acids, peptides, and analogues |
| nndimethylglycine | Carboxylic acids and derivatives    | Amino acids, peptides, and analogues |
| ser               | Carboxylic acids and derivatives    | Amino acids, peptides, and analogues |
| creatinine        | Carboxylic acids and derivatives    | Amino acids, peptides, and analogues |
| pro               | Carboxylic acids and derivatives    | Amino acids, peptides, and analogues |
| guanidinoacetate  | Carboxylic acids and derivatives    | Amino acids, peptides, and analogues |
| val               | Carboxylic acids and derivatives    | Amino acids, peptides, and analogues |
| betaine           | Carboxylic acids and derivatives    | Amino acids, peptides, and analogues |
| pipecolate        | Carboxylic acids and derivatives    | Amino acids, peptides, and analogues |
| Hydroxyproline    | Carboxylic acids and derivatives    | Amino acids, peptides, and analogues |
| creatine          | Carboxylic acids and derivatives    | Amino acids, peptides, and analogues |
| ile               | Carboxylic acids and derivatives    | Amino acids, peptides, and analogues |
| leu               | Carboxylic acids and derivatives    | Amino acids, peptides, and analogues |
| asn               | Carboxylic acids and derivatives    | Amino acids, peptides, and analogues |

|                    |                                  |                                      |
|--------------------|----------------------------------|--------------------------------------|
| ornithine          | Carboxylic acids and derivatives | Amino acids, peptides, and analogues |
| asp                | Carboxylic acids and derivatives | Amino acids, peptides, and analogues |
| prolinebetaine     | Carboxylic acids and derivatives | Amino acids, peptides, and analogues |
| gln                | Carboxylic acids and derivatives | Amino acids, peptides, and analogues |
| lys                | Carboxylic acids and derivatives | Amino acids, peptides, and analogues |
| glu                | Carboxylic acids and derivatives | Amino acids, peptides, and analogues |
| met                | Carboxylic acids and derivatives | Amino acids, peptides, and analogues |
| his                | Carboxylic acids and derivatives | Amino acids, peptides, and analogues |
| alphaaminoadipate  | Carboxylic acids and derivatives | Amino acids, peptides, and analogues |
| phe                | Carboxylic acids and derivatives | Amino acids, peptides, and analogues |
| Methylhistidine    | Carboxylic acids and derivatives | Amino acids, peptides, and analogues |
| arg                | Carboxylic acids and derivatives | Amino acids, peptides, and analogues |
| guanidinosuccinate | Carboxylic acids and derivatives | Amino acids, peptides, and analogues |
| citrulline         | Carboxylic acids and derivatives | Amino acids, peptides, and analogues |
| tyr                | Carboxylic acids and derivatives | Amino acids, peptides, and analogues |
| sdma               | Carboxylic acids and derivatives | Amino acids, peptides, and analogues |
| adma               | Carboxylic acids and derivatives | Amino acids, peptides, and analogues |
| cystine            | Carboxylic acids and derivatives | Amino acids, peptides, and analogues |
| nacetylaspartate   | Carboxylic acids and derivatives | Amino acids, peptides, and analogues |
| cysteinessulfate   | Carboxylic acids and derivatives | Amino acids, peptides, and analogues |
| fumarate           | Carboxylic acids and derivatives | Dicarboxylic acids and derivatives   |
| glutarate          | Carboxylic acids and derivatives | Dicarboxylic acids and derivatives   |
| cisaconitate       | Carboxylic acids and derivatives | Tricarboxylic acids and derivatives  |
| isocitrate         | Carboxylic acids and derivatives | Tricarboxylic acids and derivatives  |
| citrate            | Carboxylic acids and derivatives | Tricarboxylic acids and derivatives  |
| Oacetylcarnitine   | Fatty acyls                      | Fatty acid esters                    |
| gammabutyrobetaine | Fatty acyls                      | Fatty acids and conjugates           |
| Hexanoate          | Fatty acyls                      | Fatty acids and conjugates           |
| acetylbutyrate     | Fatty acyls                      | Fatty acids and conjugates           |
| Octanoate          | Fatty acyls                      | Fatty acids and conjugates           |
| pelargonate        | Fatty acyls                      | Fatty acids and conjugates           |

|                          |                                        |                                           |
|--------------------------|----------------------------------------|-------------------------------------------|
| Decanoate                | Fatty acyls                            | Fatty acids and conjugates                |
| azelate                  | Fatty acyls                            | Fatty acids and conjugates                |
| glycerophosphate         | Glycerophospholipids                   | Glycerophosphates                         |
| glycerophosphorylcholine | Glycerophospholipids                   | Glycerophosphocholines                    |
| hydroxybutyrate_3        | Hydroxy acids and derivatives          | Beta hydroxy acids and derivatives        |
| malate                   | Hydroxy acids and derivatives          | Beta hydroxy acids and derivatives        |
| lactate                  | Hydroxy acids and derivatives          | Alpha hydroxy acids and derivatives       |
| hydroxybutyrate_2        | Hydroxy acids and derivatives          | Alpha hydroxy acids and derivatives       |
| urate                    | Imidazopyrimidines                     | Purines and purine derivatives            |
| indole3acetate           | Indoles and derivatives                | Indolyl carboxylic acids and derivatives  |
| trp                      | Indoles and derivatives                | Indolyl carboxylic acids and derivatives  |
| oxoglutarate             | Keto acids and derivatives             | Gamma-keto acids and derivatives          |
| Oxoisopentanoate         | Keto acids and derivatives             | Short-chain keto acids and derivatives    |
| methyl2oxopentanoate     | Keto acids and derivatives             | Short-chain keto acids and derivatives    |
| taurine                  | Organic sulfonic acids and derivatives | Organosulfonic acids and derivatives      |
| indoxylsulfate           | Organic sulfuric acids and derivatives | Arylsulfates                              |
| trimethylaminenoxide     | Organonitrogen compounds               | Aminoxides                                |
| choline                  | Organonitrogen compounds               | Quaternary ammonium salts                 |
| carnitine                | Organonitrogen compounds               | Quaternary ammonium salts                 |
| threonate                | Organooxygen compounds                 | Carbohydrate and carbohydrate conjugates  |
| succinate                | Organooxygen compounds                 | Carbohydrates and carbohydrate conjugates |
| glucuronate              | Organooxygen compounds                 | Carbohydrates and carbohydrate conjugates |
| Mucate                   | Organooxygen compounds                 | Carbohydrates and carbohydrate conjugates |
| kynurenine               | Organooxygen compounds                 | Carbonyl compounds                        |
| Methylnicotinamide       | Pyridines and derivatives              | Pyridine-carboxylic acids and derivatives |

|            |                        |                        |
|------------|------------------------|------------------------|
| uridine    | Pyrimidine nucleosides | Pyrimidine nucleosides |
| ab         | Unclassified           | Unclassified           |
| pyruvate   | Unclassified           | Unclassified           |
| Oxoproline | Unclassified           | Unclassified           |

Supplementary Table 2. Median metabolite comparisons between BLSA and TMCS.

Wilcoxon rank-sum tests were used to compare metabolite concentrations.

BLSA: Baltimore Longitudinal Study of Aging; TMCS: Tsuruoka Metabolomics Cohort Study.

| Metabolite           | BLSA     |              |              | TMCS     |              |              | FDR-adjusted p-value |
|----------------------|----------|--------------|--------------|----------|--------------|--------------|----------------------|
|                      | Median   | 25% Quartile | 75% Quartile | Median   | 25% Quartile | 75% Quartile |                      |
| gly                  | 346.6590 | 297.9980     | 413.2901     | 225.1098 | 192.6657     | 273.8031     | <.0001               |
| trimethylaminenoxide | 6.2121   | 4.2827       | 10.4510      | 4.7151   | 2.7631       | 8.8180       | <.0001               |
| betaala              | 4.2104   | 3.4477       | 5.3380       | 2.4040   | 1.8762       | 3.2546       | <.0001               |
| ala                  | 507.1895 | 434.3979     | 577.0248     | 332.3874 | 285.3466     | 395.8898     | <.0001               |
| sarcosine            | 1.9066   | 1.5804       | 2.3440       | 2.8626   | 2.1144       | 3.7856       | <.0001               |
| aminoisobutyrate     | 1.6654   | 1.1903       | 2.3432       | 1.9216   | 1.0954       | 3.0720       | 0.0719               |
| ab                   | 24.7239  | 20.8691      | 29.8938      | 20.3995  | 17.1045      | 24.2344      | <.0001               |
| nndimethylglycine    | 3.7424   | 3.0813       | 4.6026       | 5.0215   | 3.8782       | 6.2047       | <.0001               |
| choline              | 31.0605  | 25.7066      | 36.9402      | 15.0024  | 12.7491      | 17.6179      | <.0001               |
| ser                  | 158.9177 | 139.5379     | 176.7704     | 115.3446 | 102.9358     | 129.5237     | <.0001               |
| creatinine           | 69.7186  | 59.0892      | 82.2621      | 58.6956  | 50.4210      | 70.2499      | <.0001               |
| pro                  | 203.2958 | 167.3519     | 240.3784     | 123.5639 | 101.9918     | 149.4326     | <.0001               |
| guanidinoacetate     | 2.4351   | 2.0284       | 2.8293       | 2.5747   | 2.0849       | 3.1803       | 0.0004               |
| val                  | 267.8353 | 239.2944     | 292.5737     | 215.7620 | 188.5032     | 247.4084     | <.0001               |
| betaine              | 49.0550  | 41.3603      | 56.9190      | 56.5871  | 47.2893      | 67.3843      | <.0001               |
| thr                  | 148.4164 | 132.2355     | 165.2754     | 126.2662 | 109.8556     | 145.3971     | <.0001               |

|                    |          |          |          |          |          |          |        |
|--------------------|----------|----------|----------|----------|----------|----------|--------|
| taurine            | 172.3725 | 147.1813 | 197.4634 | 74.3049  | 64.8132  | 86.7754  | <.0001 |
| pipecolate         | 1.7758   | 1.3966   | 2.9618   | 1.3216   | 1.0220   | 1.8732   | <.0001 |
| hydroxyproline     | 12.4667  | 9.8897   | 16.9533  | 7.9553   | 6.6185   | 9.7634   | <.0001 |
| creatine           | 33.0460  | 22.3931  | 44.8298  | 38.4932  | 27.3322  | 50.7825  | 0.0003 |
| ile                | 66.8646  | 59.0025  | 78.0149  | 53.9487  | 46.2084  | 64.0857  | <.0001 |
| leu                | 153.7695 | 137.0353 | 170.1310 | 113.3951 | 97.0674  | 129.4709 | <.0001 |
| asn                | 58.4164  | 53.8317  | 63.1061  | 45.4244  | 40.7959  | 51.4163  | <.0001 |
| ornithine          | 82.0486  | 69.1657  | 94.1837  | 36.2452  | 31.3595  | 42.5361  | <.0001 |
| asp                | 43.1926  | 38.2682  | 49.1246  | 3.6761   | 2.8510   | 5.6428   | <.0001 |
| methylnicotinamide | 0.4726   | 0.3695   | 0.6433   | 0.4998   | 0.3457   | 0.6557   | 0.9747 |
| prolinebetaine     | 13.2619  | 3.7118   | 23.7585  | 2.1832   | 1.1707   | 4.7594   | <.0001 |
| gammabutyrobetaine | 1.1106   | 0.9260   | 1.2822   | 1.3666   | 1.1556   | 1.6462   | <.0001 |
| gln                | 601.5756 | 553.8508 | 642.1182 | 648.1966 | 596.3095 | 705.3124 | <.0001 |
| lys                | 218.7084 | 203.1406 | 242.9836 | 176.7810 | 155.9570 | 198.9044 | <.0001 |
| glu                | 133.2329 | 108.8419 | 159.3250 | 32.3027  | 24.1248  | 42.3827  | <.0001 |
| met                | 24.6544  | 20.5385  | 28.9156  | 18.9167  | 14.0114  | 22.7383  | <.0001 |
| triethanolamine    | 0.2419   | 0.1757   | 0.3233   | 1.2411   | 0.6884   | 2.0147   | <.0001 |
| his                | 79.0593  | 74.0377  | 86.4249  | 72.8119  | 66.3083  | 78.6838  | <.0001 |
| alphaaminoadipate  | 0.9738   | 0.7493   | 1.2086   | 1.0261   | 0.8226   | 1.2604   | 0.0217 |
| carnitine          | 52.7949  | 47.2295  | 60.9552  | 62.8674  | 54.5828  | 70.9440  | <.0001 |
| phe                | 90.6306  | 82.2757  | 97.8659  | 53.9027  | 48.8927  | 59.3404  | <.0001 |
| methylhistidine    | 15.7110  | 10.0726  | 23.3666  | 5.0232   | 3.6528   | 8.2025   | <.0001 |
| arg                | 101.1714 | 85.8017  | 113.2558 | 85.0822  | 74.7995  | 94.5621  | <.0001 |
| guanidinosuccinate | 0.4321   | 0.3318   | 0.5927   | 0.4698   | 0.3201   | 0.6286   | 0.9263 |
| indole3acetate     | 2.6360   | 2.1164   | 3.2311   | 4.8906   | 2.3905   | 7.5788   | <.0001 |
| citrulline         | 55.5717  | 47.4846  | 64.6817  | 43.5503  | 37.3095  | 49.1106  | <.0001 |
| tyr                | 73.4601  | 65.3192  | 84.1446  | 61.1412  | 54.5940  | 70.6574  | <.0001 |
| sdma               | 0.5747   | 0.4861   | 0.6820   | 0.5541   | 0.4502   | 0.6610   | 0.0065 |
| adma               | 0.5533   | 0.4891   | 0.6241   | 0.5395   | 0.4478   | 0.6415   | 0.0635 |
| oacetylcarnitine   | 0.6754   | 0.3360   | 1.1723   | 0.7855   | 0.4176   | 1.2814   | 0.0189 |

|                          |           |           |           |          |          |          |        |
|--------------------------|-----------|-----------|-----------|----------|----------|----------|--------|
| trp                      | 55.7179   | 49.8577   | 61.4163   | 46.6087  | 41.2667  | 52.2516  | <.0001 |
| kynurenine               | 1.8682    | 1.6059    | 2.1967    | 1.5778   | 1.3355   | 1.8940   | <.0001 |
| cystine                  | 51.1044   | 41.9651   | 60.3313   | 61.5781  | 55.2546  | 68.2158  | <.0001 |
| uridine                  | 23.6623   | 21.8393   | 25.5747   | 23.8182  | 19.9807  | 29.7288  | 0.2755 |
| glycerophosphorylcholine | 12.8277   | 10.8503   | 14.9936   | 5.9383   | 4.8798   | 7.4174   | <.0001 |
| pyruvate                 | 45.0313   | 33.9915   | 55.3932   | 63.5563  | 51.4585  | 77.6452  | <.0001 |
| lactate                  | 1736.1398 | 1447.8995 | 2032.6032 | 651.3902 | 531.1770 | 802.1482 | <.0001 |
| hydroxybutyrate_2        | 33.0740   | 26.8653   | 42.3531   | 35.5222  | 28.3317  | 44.2596  | 0.0523 |
| hydroxybutyrate_3        | 56.1272   | 39.2703   | 85.8255   | 84.3078  | 53.0616  | 148.7473 | <.0001 |
| fumarate                 | 1.8792    | 1.5442    | 2.2563    | 1.7207   | 1.3698   | 2.1605   | 0.0017 |
| oxoisopentanoate         | 12.2004   | 10.7138   | 13.5754   | 13.4588  | 11.6178  | 15.1734  | <.0001 |
| hexanoate                | 5.9453    | 5.1856    | 6.7386    | 8.3493   | 7.0132   | 9.8724   | <.0001 |
| succinate                | 11.9939   | 10.1058   | 14.0248   | 9.5699   | 8.1109   | 11.2661  | <.0001 |
| oxoproline               | 47.0167   | 41.0473   | 54.0453   | 27.9016  | 24.1717  | 32.1348  | <.0001 |
| methyl2oxopentanoate     | 47.2239   | 40.1845   | 55.0041   | 49.8576  | 41.7089  | 57.8870  | 0.0022 |
| acetylbutyrate           | 1.7842    | 1.5137    | 2.0462    | 1.6535   | 1.1657   | 2.0909   | 0.0049 |
| glutarate                | 4.3100    | 2.8687    | 5.5270    | 4.5841   | 3.5591   | 5.8675   | 0.0006 |
| malate                   | 7.2647    | 5.8644    | 8.6264    | 6.2071   | 5.2270   | 7.3108   | <.0001 |
| threonate                | 32.1082   | 26.3712   | 37.8609   | 30.5966  | 25.8203  | 35.5713  | 0.0243 |
| octanoate                | 1.6839    | 1.3643    | 1.9985    | 2.4633   | 2.0958   | 2.8823   | <.0001 |
| oxoglutarate             | 10.8199   | 8.3835    | 14.1896   | 13.3713  | 11.6281  | 15.8200  | <.0001 |
| pelargonate              | 3.3506    | 2.2807    | 4.2772    | 3.3923   | 2.9236   | 4.1151   | 0.0103 |
| terephthalate            | 1.4947    | 1.2870    | 1.7757    | 0.6860   | 0.5373   | 0.8572   | <.0001 |
| urate                    | 283.5751  | 238.7524  | 334.0695  | 259.6904 | 215.9469 | 305.6050 | <.0001 |
| glycerophosphate         | 4.6515    | 3.3747    | 5.8516    | 2.5489   | 2.0420   | 3.0992   | <.0001 |
| decanoate                | 3.2544    | 2.7880    | 3.8525    | 7.3086   | 6.0607   | 8.7219   | <.0001 |
| cisaconitate             | 2.5629    | 2.2462    | 3.1854    | 5.7546   | 4.8667   | 6.6105   | <.0001 |
| nacetylaspargate         | 0.5536    | 0.4675    | 0.6582    | 0.7407   | 0.6057   | 0.8945   | <.0001 |
| hippurate                | 5.7742    | 2.9516    | 9.7600    | 4.1811   | 1.5200   | 6.8677   | <.0001 |
| azelate                  | 55.3257   | 1.0007    | 75.5652   | 0.9414   | 0.7811   | 1.1826   | <.0001 |

|                  |         |         |         |          |         |          |        |
|------------------|---------|---------|---------|----------|---------|----------|--------|
| isocitrate       | 4.3289  | 3.6953  | 5.2476  | 5.3206   | 4.3231  | 6.6892   | <.0001 |
| citrate          | 81.4959 | 71.3022 | 93.0391 | 105.4264 | 87.9522 | 128.1160 | <.0001 |
| glucuronate      | 4.5203  | 3.9433  | 5.7970  | 3.7086   | 2.9678  | 4.5770   | <.0001 |
| cysteinessulfate | 1.6015  | 1.2300  | 4.0881  | 1.0159   | 0.2399  | 1.3372   | <.0001 |
| mucate           | 9.6127  | 6.8518  | 12.0668 | 8.1004   | 6.5964  | 9.5099   | <.0001 |
| indoxylsulfate   | 4.4620  | 3.0948  | 6.2289  | 3.9497   | 2.6277  | 5.6507   | 0.0017 |

\*Units for metabolite concentrations are  $\mu\text{M}$ .

Supplementary Table 3a. Logistic regression model results for BLSA cohort.

MetS: Metabolic syndrome; OR: odds ratio; WC: waist circumference; TG: triglyceride; BP: blood pressure; FG: fasting glucose.

| Metabolite          | MetS OR | MetS p-value | MetS FDR p-value | WC OR | WC p-value | WC FDR p-value | Elevated TGs OR | Elevated TGs p-value | Elevated TGs FDR p-value | Reduced HDL-c OR | Reduced HDL-c p-value | Reduced HDL-c FDR p-value | BP OR | BP p-value | BP FDR p-value | Elevated FG OR | Elevated FG p-value | Elevated FG FDR p-value |
|---------------------|---------|--------------|------------------|-------|------------|----------------|-----------------|----------------------|--------------------------|------------------|-----------------------|---------------------------|-------|------------|----------------|----------------|---------------------|-------------------------|
| urate+              | 2.86    | 1.55e-05     | 0.0012749        | 3.12  | 6.8e-06    | 0.0002781      | 1.79            | 0.0121316            | 0.110532                 | 1.46             | 0.0835315             | 0.3678401                 | 1.46  | 0.1016421  | 0.5556437      | 2.57           | 0.0001303           | 0.0001303               |
| alpha aminoadipate* | 2.48    | 4.06e-05     | 0.0016659        | 2.04  | 0.0010448  | 0.0154273      | 1.8             | 0.0068657            | 0.0703738                | 1.41             | 0.0836582             | 0.3678401                 | 1.58  | 0.0278568  | 0.2855326      | 2.46           | 7.36e-05            | 7.36e-05                |
| phe*                | 2.03    | 0.0002112    | 0.0043297        | 1.65  | 0.0063231  | 0.0345665      | 1.82            | 0.0020797            | 0.0426343                | 1.71             | 0.0034914             | 0.095431                  | 1.24  | 0.2353416  | 0.7132589      | 1.26           | 0.1859604           | 0.1859604               |
| oxoglutarate        | 2.19    | 0.0001775    | 0.0043297        | 1.9   | 0.0014604  | 0.017107       | 2.02            | 0.0011848            | 0.0323834                | 1.83             | 0.0023635             | 0.095431                  | 1.26  | 0.2377419  | 0.7132589      | 1.68           | 0.0098953           | 0.0098953               |
| glu*                | 2.24    | 0.0003067    | 0.004775         | 2.3   | 0.000298   | 0.0081459      | 1.63            | 0.0248187            | 0.1356754                | 1.98             | 0.0014406             | 0.095431                  | 1.18  | 0.4472154  | 0.8929173      | 1.62           | 0.024978            | 0.024978                |
| glucuronate         | 2.02    | 0.0003494    | 0.004775         | 1.45  | 0.0483555  | 0.158606       | 1.76            | 0.0042913            | 0.0502699                | 1.34             | 0.1064271             | 0.3678401                 | 1.48  | 0.0434141  | 0.3955502      | 1.65           | 0.0096971           | 0.0096971               |
| hydroxy             | 1.96    | 0.0004903    | 0.0057433        | 1.92  | 0.0008692  | 0.0154273      | 1.45            | 0.0507587            | 0.209999                 | 1.45             | 0.0419114             | 0.2863942                 | 1.6   | 0.0147153  | 0.2855326      | 2.18           | 0.0001256           | 0.0001256               |

|                                       |      |               |               |      |               |               |      |               |               |      |           |               |      |               |               |      |               |               |
|---------------------------------------|------|---------------|---------------|------|---------------|---------------|------|---------------|---------------|------|-----------|---------------|------|---------------|---------------|------|---------------|---------------|
| utyra<br>te_2*                        |      |               |               |      |               |               |      |               |               |      |           |               |      |               |               |      |               |               |
| cysti<br>ne*                          | 2.11 | 0.00081<br>49 | 0.008352<br>7 | 2.15 | 0.0011<br>288 | 0.01542<br>73 | 2.12 | 0.00117<br>57 | 0.03238<br>34 | 1.76 | 0.0063302 | 0.10381<br>53 | 1.64 | 0.021<br>9236 | 0.2855<br>326 | 1.15 | 0.49510<br>75 | 0.49510<br>75 |
| asnt                                  | 0.56 | 0.00164<br>65 | 0.013500<br>9 | 0.57 | 0.0020<br>046 | 0.01826<br>41 | 0.71 | 0.05990<br>85 | 0.23392<br>84 | 0.76 | 0.1164713 | 0.36784<br>01 | 0.77 | 0.141<br>1488 | 0.6935<br>139 | 0.94 | 0.71494<br>29 | 0.71494<br>29 |
| meth<br>yl2ox<br>opent<br>anoat<br>e* | 2.05 | 0.00153<br>37 | 0.013500<br>9 | 2.01 | 0.0024<br>752 | 0.01845<br>18 | 1.75 | 0.01523<br>24 | 0.11355<br>04 | 1.57 | 0.038201  | 0.28477<br>11 | 1.48 | 0.082<br>0901 | 0.5177<br>988 | 2.5  | 0.00015<br>43 | 0.00015<br>43 |
| ile*                                  | 1.96 | 0.00316<br>86 | 0.021655<br>3 | 1.99 | 0.0033<br>765 | 0.02307<br>25 | 1.38 | 0.16994<br>63 | 0.47385<br>01 | 1.5  | 0.0665351 | 0.36784<br>01 | 0.98 | 0.947<br>1096 | 0.9830<br>758 | 1.92 | 0.00491<br>99 | 0.00491<br>99 |
| leu*                                  | 1.93 | 0.00316<br>91 | 0.021655<br>3 | 1.81 | 0.0086<br>406 | 0.04428<br>29 | 1.55 | 0.05121<br>93 | 0.20999<br>9  | 1.77 | 0.0088087 | 0.12038<br>58 | 1.32 | 0.210<br>5313 | 0.7132<br>589 | 1.64 | 0.02402<br>18 | 0.02402<br>18 |
| oxois<br>opent<br>anoat<br>e*         | 1.76 | 0.00364<br>62 | 0.022999      | 1.83 | 0.0024<br>743 | 0.01845<br>18 | 1.64 | 0.01366<br>46 | 0.11204<br>96 | 1.31 | 0.1463558 | 0.40003<br>92 | 1.67 | 0.009<br>4109 | 0.2855<br>326 | 1.82 | 0.00269<br>77 | 0.00269<br>77 |
| gln*                                  | 0.55 | 0.00436<br>07 | 0.025541<br>4 | 0.63 | 0.0278<br>492 | 0.10854<br>88 | 0.76 | 0.18678<br>39 | 0.47385<br>01 | 0.84 | 0.38161   | 0.65191<br>71 | 0.69 | 0.067<br>2048 | 0.4934<br>755 | 0.8  | 0.28658<br>75 | 0.28658<br>75 |
| guani<br>dinoa<br>cetat<br>et         | 0.54 | 0.00681<br>09 | 0.037232<br>7 | 0.82 | 0.3833<br>299 | 0.65485<br>52 | 0.62 | 0.03525<br>68 | 0.17006<br>23 | 0.73 | 0.1419583 | 0.40003<br>92 | 0.72 | 0.151<br>6246 | 0.6935<br>139 | 1.15 | 0.51984<br>16 | 0.51984<br>16 |
| carni<br>tinet                        | 1.66 | 0.00816<br>34 | 0.040628<br>3 | 1.25 | 0.2440<br>806 | 0.55596<br>15 | 1.56 | 0.02192<br>07 | 0.13567<br>54 | 1.29 | 0.1632407 | 0.43179<br>79 | 1.63 | 0.014<br>6088 | 0.2855<br>326 | 1.62 | 0.01442<br>79 | 0.01442<br>79 |
| tyr*                                  | 1.65 | 0.00842<br>29 | 0.040628<br>3 | 1.85 | 0.0018<br>745 | 0.01826<br>41 | 1.76 | 0.00407<br>9  | 0.05026<br>99 | 1.36 | 0.0968901 | 0.36784<br>01 | 1.28 | 0.196<br>2907 | 0.7132<br>589 | 1.41 | 0.07125<br>58 | 0.07125<br>58 |
| gly*                                  | 0.57 | 0.01099<br>62 | 0.050093<br>8 | 0.64 | 0.0424<br>553 | 0.14505<br>55 | 0.6  | 0.02479<br>37 | 0.13567<br>54 | 0.93 | 0.7252369 | 0.85831<br>58 | 0.61 | 0.027<br>5791 | 0.2855<br>326 | 1.03 | 0.90754<br>03 | 0.90754<br>03 |
| uridi<br>net                          | 1.62 | 0.01594<br>85 | 0.065388<br>7 | 1.45 | 0.0680<br>407 | 0.20664<br>22 | 1.37 | 0.12816<br>42 | 0.38923<br>94 | 1.36 | 0.1166322 | 0.36784<br>01 | 1.65 | 0.015<br>4208 | 0.2855<br>326 | 1.83 | 0.00364<br>66 | 0.00364<br>66 |
| pro*                                  | 1.62 | 0.01556<br>48 | 0.065388<br>7 | 1.26 | 0.2546<br>814 | 0.56442<br>9  | 2    | 0.00116<br>68 | 0.03238<br>34 | 1.63 | 0.013614  | 0.15947<br>84 | 1.08 | 0.702<br>3314 | 0.9581<br>81  | 1.47 | 0.05536<br>05 | 0.05536<br>05 |
| ala*                                  | 1.59 | 0.02153<br>72 | 0.084097<br>7 | 1.84 | 0.0044<br>653 | 0.02816<br>57 | 1.31 | 0.18506<br>24 | 0.47385<br>01 | 1.27 | 0.2107447 | 0.46705<br>59 | 1.05 | 0.794<br>9921 | 0.9581<br>81  | 1.71 | 0.01053<br>76 | 0.01053<br>76 |
| pyru<br>vate*                         | 1.48 | 0.02281<br>4  | 0.085034      | 1.65 | 0.0056<br>176 | 0.03290<br>32 | 1.48 | 0.02931<br>09 | 0.15021<br>83 | 1.24 | 0.1971317 | 0.46705<br>59 | 1.1  | 0.589<br>3669 | 0.9529<br>254 | 1.32 | 0.11243<br>55 | 0.11243<br>55 |
| isocit<br>rate*                       | 1.55 | 0.02721<br>06 | 0.097011<br>5 | 1.27 | 0.2310<br>166 | 0.55086<br>08 | 1.22 | 0.32663<br>01 | 0.56662<br>33 | 0.97 | 0.8887592 | 0.93308<br>36 | 1.59 | 0.024<br>0846 | 0.2855<br>326 | 1.06 | 0.75792<br>31 | 0.75792<br>31 |
| lactat<br>e*                          | 1.61 | 0.02887<br>57 | 0.098658<br>6 | 3.16 | 6.6e-<br>06   | 0.00027<br>81 | 1.24 | 0.32735<br>95 | 0.56662<br>33 | 1.6  | 0.0290942 | 0.28477<br>11 | 1.17 | 0.467<br>1827 | 0.8929<br>173 | 1.79 | 0.01092<br>41 | 0.01092<br>41 |
| val*                                  | 1.51 | 0.03842<br>47 | 0.125020<br>4 | 1.57 | 0.0291<br>228 | 0.10854<br>88 | 1.45 | 0.07318<br>48 | 0.27230<br>44 | 1.38 | 0.0995825 | 0.36784<br>01 | 1.19 | 0.397<br>656  | 0.8929<br>173 | 1.66 | 0.01403<br>39 | 0.01403<br>39 |



|                   |      |           |           |      |           |           |      |           |           |      |           |           |      |           |           |       |           |           |
|-------------------|------|-----------|-----------|------|-----------|-----------|------|-----------|-----------|------|-----------|-----------|------|-----------|-----------|-------|-----------|-----------|
| asp               | 1.44 | 0.0396406 | 0.1250204 | 1.41 | 0.0559126 | 0.1763398 | 1.18 | 0.3489762 | 0.5666233 | 1.45 | 0.0360764 | 0.2847711 | 0.97 | 0.885247  | 0.9690342 | 1.01  | 0.9401103 | 0.9401103 |
| taurine           | 0.7  | 0.0487181 | 0.1479588 | 0.87 | 0.4479851 | 0.694422  | 0.85 | 0.3817128 | 0.5905745 | 1.17 | 0.3804769 | 0.6519171 | 0.87 | 0.4693061 | 0.8929173 | 0.74  | 0.1002705 | 0.1002705 |
| kynurenine        | 1.42 | 0.059985  | 0.1756703 | 1.5  | 0.036755  | 0.1310396 | 1.4  | 0.0836536 | 0.2858166 | 1.32 | 0.1263946 | 0.3701555 | 1.42 | 0.0722159 | 0.4934755 | 0.97  | 0.8737608 | 0.8737608 |
| betaalanine       | 1.45 | 0.066824  | 0.1889505 | 1.23 | 0.3170903 | 0.6459306 | 1.24 | 0.2995782 | 0.5666233 | 1.25 | 0.270682  | 0.5284743 | 1.2  | 0.3910166 | 0.8929173 | 1.37  | 0.1234898 | 0.1234898 |
| creatine          | 1.54 | 0.0989546 | 0.2704758 | 1.01 | 0.9682452 | 0.9801988 | 1.35 | 0.2736941 | 0.5473882 | 0.96 | 0.8657615 | 0.9330836 | 1.36 | 0.2516465 | 0.7132589 | 1.05  | 0.8408483 | 0.8408483 |
| methyldiamine     | 1.36 | 0.1035021 | 0.2737797 | 0.96 | 0.8247282 | 0.9084175 | 1.48 | 0.0468146 | 0.209999  | 1.2  | 0.3292477 | 0.5869198 | 1.27 | 0.2237699 | 0.7132589 | 1.28  | 0.2009708 | 0.2009708 |
| glycerophosphate  | 0.66 | 0.1078394 | 0.2763386 | 0.55 | 0.0240341 | 0.103726  | 0.65 | 0.1117298 | 0.3523787 | 1.04 | 0.8640148 | 0.9330836 | 1    | 0.9945072 | 0.9945072 | 1.04  | 0.8914283 | 0.8914283 |
| hydroxyproline    | 1.35 | 0.1172216 | 0.2912779 | 1.29 | 0.1873698 | 0.4801352 | 1.1  | 0.6195232 | 0.8024185 | 0.85 | 0.3950907 | 0.6611722 | 1.45 | 0.0597757 | 0.4901607 | 1.36  | 0.1280557 | 0.1280557 |
| oxoprolinone      | 0.73 | 0.1226328 | 0.2957615 | 0.89 | 0.5824415 | 0.7654511 | 0.61 | 0.02331   | 0.1356754 | 0.78 | 0.2195247 | 0.4737113 | 1.04 | 0.8589644 | 0.9690342 | 1.29  | 0.2312121 | 0.2312121 |
| azelate           | 4.26 | 0.1774736 | 0.4157953 | 0.99 | 0.9926722 | 0.9926722 | 6.42 | 0.0996082 | 0.3267151 | 2.32 | 0.4378325 | 0.6648568 | 1.8  | 0.5926731 | 0.9529254 | 10.02 | 0.0383527 | 0.0383527 |
| indoxylsulfate    | 1.26 | 0.2148111 | 0.4892918 | 1.21 | 0.3019977 | 0.6459306 | 1.27 | 0.2237079 | 0.5091814 | 1.1  | 0.5901207 | 0.7763451 | 1.07 | 0.7264501 | 0.958181  | 1.21  | 0.3242103 | 0.3242103 |
| ndimethylglycine  | 1.25 | 0.2362706 | 0.4967741 | 1.32 | 0.1553875 | 0.4306571 | 1.28 | 0.2100594 | 0.5066139 | 1.38 | 0.0956774 | 0.3678401 | 1.08 | 0.7140729 | 0.958181  | 1.33  | 0.1536487 | 0.1536487 |
| hydroxybutyrate_3 | 1.25 | 0.2361668 | 0.4967741 | 1.07 | 0.7388596 | 0.8513989 | 1.29 | 0.1906958 | 0.4738501 | 1.16 | 0.436311  | 0.6648568 | 1.06 | 0.7551738 | 0.958181  | 1.36  | 0.1169592 | 0.1169592 |
| nacetylaspartate  | 0.8  | 0.2318173 | 0.4967741 | 0.88 | 0.4943413 | 0.723857  | 0.56 | 0.0041343 | 0.0502699 | 0.6  | 0.0058294 | 0.1038153 | 1.06 | 0.7476071 | 0.958181  | 0.98  | 0.9289166 | 0.9289166 |

|                    |      |           |           |      |           |           |      |           |           |      |           |           |      |           |           |      |           |           |
|--------------------|------|-----------|-----------|------|-----------|-----------|------|-----------|-----------|------|-----------|-----------|------|-----------|-----------|------|-----------|-----------|
| creatine           | 1.29 | 0.243625  | 0.4994261 | 1.17 | 0.4664378 | 0.7082945 | 1.11 | 0.6267624 | 0.8024185 | 1.19 | 0.4052188 | 0.6645589 | 1.37 | 0.1580975 | 0.6935139 | 2.01 | 0.0030579 | 0.0030579 |
| mucaite            | 0.84 | 0.3490046 | 0.6980092 | 0.89 | 0.5440174 | 0.7633417 | 1    | 0.989196  | 0.989196  | 0.98 | 0.9103255 | 0.9330836 | 1.24 | 0.2784016 | 0.7609644 | 0.77 | 0.1898986 | 0.1898986 |
| trp                | 1.17 | 0.4245057 | 0.7911243 | 1.1  | 0.6249143 | 0.7764087 | 1.21 | 0.3447414 | 0.5666233 | 1.39 | 0.0934689 | 0.3678401 | 1.16 | 0.4716655 | 0.8929173 | 1.34 | 0.1467392 | 0.1467392 |
| glutamate          | 0.85 | 0.4094869 | 0.7911243 | 1.2  | 0.3465969 | 0.6459306 | 0.92 | 0.6822048 | 0.8349372 | 0.93 | 0.7018101 | 0.8463004 | 1.16 | 0.4610684 | 0.8929173 | 0.85 | 0.4096753 | 0.4096753 |
| malate             | 1.19 | 0.4160483 | 0.7911243 | 1.66 | 0.025703  | 0.1053825 | 0.78 | 0.2632299 | 0.5396213 | 1.1  | 0.6434038 | 0.811267  | 1.15 | 0.533362  | 0.9305464 | 1.71 | 0.0186557 | 0.0186557 |
| lys                | 0.86 | 0.4393884 | 0.8006633 | 0.76 | 0.1575575 | 0.4306571 | 1.02 | 0.9082876 | 0.9500554 | 1.05 | 0.8154076 | 0.9159373 | 1.05 | 0.814966  | 0.958181  | 1.12 | 0.5581157 | 0.5581157 |
| arg                | 1.14 | 0.4782816 | 0.8525889 | 1.32 | 0.1642071 | 0.4343544 | 0.91 | 0.6231361 | 0.8024185 | 0.79 | 0.2103075 | 0.4670559 | 1.06 | 0.7634363 | 0.958181  | 1.72 | 0.0079272 | 0.0079272 |
| succinate          | 1.16 | 0.4903142 | 0.8554419 | 1.73 | 0.0152019 | 0.0733268 | 0.99 | 0.9545284 | 0.9783916 | 0.92 | 0.68518   | 0.8385786 | 1.36 | 0.1716971 | 0.6935139 | 1.33 | 0.1984308 | 0.1984308 |
| ab                 | 1.12 | 0.5571995 | 0.8767424 | 1.12 | 0.5512701 | 0.7633417 | 1.16 | 0.4397447 | 0.6677605 | 1.27 | 0.2028021 | 0.4670559 | 1.12 | 0.5468875 | 0.9342662 | 1.76 | 0.005708  | 0.005708  |
| betaine            | 1.11 | 0.5682087 | 0.8767424 | 0.84 | 0.3390809 | 0.6459306 | 1.26 | 0.2253792 | 0.5091814 | 1.23 | 0.2565532 | 0.5173559 | 1.04 | 0.8296445 | 0.958181  | 0.97 | 0.8911876 | 0.8911876 |
| thr                | 0.91 | 0.5901895 | 0.8767424 | 0.96 | 0.8308697 | 0.9084175 | 0.98 | 0.9126284 | 0.9500554 | 0.91 | 0.5780688 | 0.7763451 | 1.2  | 0.2987126 | 0.790143  | 1.11 | 0.5342217 | 0.5342217 |
| ornithine          | 1.1  | 0.6302656 | 0.8767424 | 1.19 | 0.3738122 | 0.6548552 | 0.97 | 0.8966096 | 0.9500554 | 1.5  | 0.0324277 | 0.2847711 | 0.99 | 0.9373607 | 0.9830758 | 1.16 | 0.4346935 | 0.4346935 |
| methylnicotinamide | 1.09 | 0.6477893 | 0.8767424 | 0.83 | 0.3345405 | 0.6459306 | 1.4  | 0.0763781 | 0.2723044 | 1    | 0.9799502 | 0.9906333 | 1.05 | 0.808185  | 0.958181  | 0.75 | 0.1306787 | 0.1306787 |
| prolinebetaine     | 0.92 | 0.6522108 | 0.8767424 | 1.16 | 0.4759311 | 0.70957   | 0.79 | 0.2359621 | 0.5091814 | 0.95 | 0.8008471 | 0.9120759 | 0.91 | 0.6540075 | 0.958181  | 0.87 | 0.4885932 | 0.4885932 |
| indoleacetate      | 1.09 | 0.6390022 | 0.8767424 | 1.62 | 0.0165376 | 0.075338  | 1.23 | 0.3073066 | 0.5666233 | 0.91 | 0.6059279 | 0.7763451 | 0.99 | 0.9649766 | 0.9891011 | 1.18 | 0.399878  | 0.399878  |
| adma               | 0.9  | 0.5835007 | 0.8767424 | 1.28 | 0.2031784 | 0.5048675 | 1.04 | 0.8437136 | 0.9500554 | 1.12 | 0.5471842 | 0.7703047 | 1    | 0.9888073 | 0.9945072 | 0.85 | 0.4112826 | 0.4112826 |
| fumarate           | 1.1  | 0.625998  | 0.8767424 | 1.37 | 0.1346424 | 0.39431   | 0.96 | 0.8298361 | 0.9500554 | 1.21 | 0.3270308 | 0.5869198 | 1.05 | 0.8285653 | 0.958181  | 1.19 | 0.3912086 | 0.3912086 |
| acetylbutyrate     | 1.13 | 0.5286296 | 0.8767424 | 1.02 | 0.9051377 | 0.9277662 | 1.15 | 0.4729548 | 0.692541  | 1.03 | 0.8685751 | 0.9330836 | 1.09 | 0.6719824 | 0.958181  | 1.14 | 0.4933298 | 0.4933298 |
| decanoate          | 1.1  | 0.6085615 | 0.8767424 | 0.88 | 0.507233  | 0.7297036 | 1.1  | 0.6251906 | 0.8024185 | 0.86 | 0.4146538 | 0.6648568 | 1.13 | 0.5328012 | 0.9305464 | 1.21 | 0.3406765 | 0.3406765 |

|                                    |      |               |               |      |               |               |      |               |               |      |           |               |      |               |               |      |               |               |
|------------------------------------|------|---------------|---------------|------|---------------|---------------|------|---------------|---------------|------|-----------|---------------|------|---------------|---------------|------|---------------|---------------|
| cisac<br>onita<br>te               | 1.11 | 0.57733<br>16 | 0.876742<br>4 | 1.1  | 0.6068<br>133 | 0.76551<br>83 | 0.95 | 0.77239<br>46 | 0.91791<br>82 | 0.8  | 0.2036275 | 0.46705<br>59 | 1.29 | 0.175<br>7319 | 0.6935<br>139 | 1.11 | 0.56359<br>85 | 0.56359<br>85 |
| hipp<br>urate                      | 0.93 | 0.65217<br>78 | 0.876742<br>4 | 1.02 | 0.8993<br>822 | 0.92776<br>62 | 0.98 | 0.91529<br>73 | 0.95005<br>54 | 0.84 | 0.3011394 | 0.56727<br>66 | 0.96 | 0.812<br>4084 | 0.9581<br>81  | 1    | 0.99844<br>4  | 0.99844<br>4  |
| cystei<br>nessu<br>lfate           | 1.18 | 0.63217<br>21 | 0.876742<br>4 | 1.13 | 0.7112<br>498 | 0.83317<br>84 | 0.82 | 0.55397<br>1  | 0.78320<br>03 | 1.66 | 0.1242991 | 0.37015<br>55 | 0.85 | 0.615<br>611  | 0.9581<br>81  | 1.15 | 0.70083<br>06 | 0.70083<br>06 |
| trieth<br>anola<br>mine            | 1.1  | 0.67049<br>7  | 0.886786<br>4 | 1.04 | 0.8492<br>549 | 0.91630<br>14 | 1.25 | 0.31597<br>78 | 0.56662<br>33 | 1.42 | 0.1050324 | 0.36784<br>01 | 0.76 | 0.247<br>8779 | 0.7132<br>589 | 1.22 | 0.35909<br>53 | 0.35909<br>53 |
| sarco<br>sine                      | 0.94 | 0.73686<br>95 | 0.901840<br>3 | 0.85 | 0.3787<br>975 | 0.65485<br>52 | 1.24 | 0.23380<br>17 | 0.50918<br>14 | 1.09 | 0.6018628 | 0.77634<br>51 | 1.05 | 0.788<br>1221 | 0.9581<br>81  | 1.18 | 0.36132<br>33 | 0.36132<br>33 |
| gam<br>mab<br>utyro<br>betai<br>ne | 0.93 | 0.72740<br>59 | 0.901840<br>3 | 0.79 | 0.2351<br>235 | 0.55086<br>08 | 0.97 | 0.87529<br>62 | 0.95005<br>54 | 0.82 | 0.3043923 | 0.56727<br>66 | 0.87 | 0.496<br>1141 | 0.9040<br>302 | 1.04 | 0.85165<br>08 | 0.85165<br>08 |
| his                                | 0.93 | 0.70287<br>94 | 0.901840<br>3 | 0.91 | 0.5880<br>905 | 0.76545<br>11 | 1.31 | 0.14406<br>46 | 0.42190<br>34 | 1.12 | 0.5310666 | 0.77030<br>47 | 1.19 | 0.341<br>4171 | 0.8308<br>331 | 1.17 | 0.38141<br>72 | 0.38141<br>72 |
| citrul<br>line                     | 0.93 | 0.72157<br>74 | 0.901840<br>3 | 0.84 | 0.4298<br>674 | 0.69115<br>93 | 1.12 | 0.59370<br>74 | 0.80241<br>85 | 0.93 | 0.7327086 | 0.85831<br>58 | 0.78 | 0.252<br>2501 | 0.7132<br>589 | 1.23 | 0.34721<br>09 | 0.34721<br>09 |
| oacet<br>ylcar<br>nitin<br>e       | 1.07 | 0.72806<br>86 | 0.901840<br>3 | 0.88 | 0.5668<br>399 | 0.76334<br>17 | 1.15 | 0.50615<br>36 | 0.72815<br>08 | 1.03 | 0.8795215 | 0.93308<br>36 | 0.97 | 0.882<br>5241 | 0.9690<br>342 | 1.29 | 0.24189<br>03 | 0.24189<br>03 |
| sdma                               | 0.93 | 0.75361<br>04 | 0.908765<br>4 | 0.81 | 0.3338<br>43  | 0.64593<br>06 | 1.23 | 0.35932<br>21 | 0.56662<br>33 | 1.13 | 0.5542436 | 0.77030<br>47 | 0.85 | 0.461<br>1296 | 0.8929<br>173 | 0.89 | 0.61158<br>19 | 0.61158<br>19 |
| ser                                | 1.05 | 0.80460<br>92 | 0.929267      | 0.91 | 0.6720<br>198 | 0.80698<br>07 | 0.91 | 0.67608<br>6  | 0.83493<br>72 | 1.45 | 0.0829508 | 0.36784<br>01 | 0.74 | 0.177<br>6072 | 0.6935<br>139 | 1.16 | 0.49938<br>65 | 0.49938<br>65 |
| pipec<br>olate                     | 1.05 | 0.78845<br>79 | 0.929267      | 0.87 | 0.4488<br>337 | 0.69442<br>2  | 1.19 | 0.35868<br>24 | 0.56662<br>33 | 1    | 0.9906333 | 0.99063<br>33 | 1.21 | 0.322<br>3697 | 0.8260<br>723 | 1.04 | 0.83257<br>3  | 0.83257<br>3  |
| threo<br>nate                      | 0.95 | 0.79611<br>46 | 0.929267      | 0.97 | 0.8807<br>766 | 0.92776<br>62 | 1.27 | 0.25114<br>44 | 0.52804<br>71 | 1.4  | 0.0981808 | 0.36784<br>01 | 0.92 | 0.679<br>2021 | 0.9581<br>81  | 1.01 | 0.94347<br>64 | 0.94347<br>64 |
| guani<br>dinos<br>uccin<br>ate     | 1.04 | 0.83120<br>77 | 0.946653<br>2 | 0.92 | 0.6790<br>448 | 0.80698<br>07 | 1.01 | 0.97869<br>58 | 0.98919<br>6  | 0.85 | 0.4240695 | 0.66485<br>68 | 0.93 | 0.725<br>2214 | 0.9581<br>81  | 0.92 | 0.67656<br>1  | 0.67656<br>1  |
| pelar<br>gonat<br>e                | 0.95 | 0.86895<br>77 | 0.976089<br>4 | 1.28 | 0.4288<br>221 | 0.69115<br>93 | 1.27 | 0.45219<br>72 | 0.67418<br>49 | 0.85 | 0.5831674 | 0.77634<br>51 | 0.74 | 0.344<br>4918 | 0.8308<br>331 | 1.59 | 0.13352<br>59 | 0.13352<br>59 |
| trime<br>thyla                     | 0.98 | 0.91939<br>57 | 0.985291<br>8 | 1.11 | 0.5678<br>517 | 0.76334<br>17 | 0.92 | 0.63606<br>34 | 0.80241<br>85 | 0.88 | 0.4522394 | 0.67424<br>79 | 0.98 | 0.923<br>5115 | 0.9830<br>758 | 1.04 | 0.84605<br>22 | 0.84605<br>22 |

|                                              |      |               |               |      |               |               |      |               |               |      |           |               |      |               |               |      |               |               |
|----------------------------------------------|------|---------------|---------------|------|---------------|---------------|------|---------------|---------------|------|-----------|---------------|------|---------------|---------------|------|---------------|---------------|
| mine<br>noxi<br>de                           |      |               |               |      |               |               |      |               |               |      |           |               |      |               |               |      |               |               |
| amin<br>oisob<br>utyra<br>te                 | 1.02 | 0.91436<br>48 | 0.985291<br>8 | 0.97 | 0.8917<br>433 | 0.92776<br>62 | 1.11 | 0.61380<br>26 | 0.80241<br>85 | 1.26 | 0.2558316 | 0.51735<br>59 | 1.16 | 0.461<br>9424 | 0.8929<br>173 | 0.88 | 0.54876<br>35 | 0.54876<br>35 |
| met                                          | 0.97 | 0.90316<br>72 | 0.985291<br>8 | 0.89 | 0.6054<br>908 | 0.76551<br>83 | 0.97 | 0.89433<br>2  | 0.95005<br>54 | 0.91 | 0.652971  | 0.81126<br>7  | 1.07 | 0.761<br>834  | 0.9581<br>81  | 1.24 | 0.33565<br>61 | 0.33565<br>61 |
| glyce<br>roph<br>osph<br>orylc<br>holin<br>e | 1.01 | 0.96337<br>57 | 0.985291<br>8 | 0.95 | 0.8154<br>153 | 0.90841<br>75 | 0.96 | 0.84924<br>81 | 0.95005<br>54 | 0.89 | 0.5519454 | 0.77030<br>47 | 0.97 | 0.886<br>3118 | 0.9690<br>342 | 1.2  | 0.36235<br>29 | 0.36235<br>29 |
| hexa<br>noate                                | 0.99 | 0.94109<br>96 | 0.985291<br>8 | 0.94 | 0.7475<br>698 | 0.85139<br>89 | 0.78 | 0.19049<br>31 | 0.47385<br>01 | 0.79 | 0.2031546 | 0.46705<br>59 | 1.37 | 0.097<br>4794 | 0.5556<br>437 | 1.2  | 0.32547<br>88 | 0.32547<br>88 |
| octan<br>oate                                | 0.99 | 0.95965<br>11 | 0.985291<br>8 | 0.84 | 0.3724<br>342 | 0.65485<br>52 | 0.97 | 0.87001<br>39 | 0.95005<br>54 | 0.8  | 0.258678  | 0.51735<br>59 | 0.87 | 0.479<br>1264 | 0.8929<br>173 | 1.33 | 0.14791<br>76 | 0.14791<br>76 |
| terep<br>hthal<br>ate                        | 1.01 | 0.97327<br>6  | 0.985291<br>8 | 0.92 | 0.6455<br>011 | 0.79001<br>63 | 0.84 | 0.35500<br>24 | 0.56662<br>33 | 1.06 | 0.7467034 | 0.86238<br>99 | 1.01 | 0.938<br>2015 | 0.9830<br>758 | 1.15 | 0.44281<br>81 | 0.44281<br>81 |
| citrat<br>e                                  | 1.01 | 0.95285<br>37 | 0.985291<br>8 | 0.83 | 0.3230<br>478 | 0.64593<br>06 | 0.93 | 0.70880<br>63 | 0.85473<br>7  | 0.75 | 0.1149588 | 0.36784<br>01 | 1.11 | 0.592<br>0816 | 0.9529<br>254 | 0.84 | 0.36112<br>77 | 0.36112<br>77 |
| choli<br>ne                                  | 1    | 0.99102<br>8  | 0.991028      | 1.28 | 0.4089<br>838 | 0.68442<br>19 | 0.75 | 0.34443<br>88 | 0.56662<br>33 | 1.04 | 0.9035426 | 0.93308<br>36 | 1.15 | 0.654<br>1611 | 0.9581<br>81  | 1.24 | 0.46520<br>82 | 0.46520<br>82 |

\* Indicates a metabolite among the 25 most significant metabolites in both BLSA and TMCS.

† Indicates a metabolite which is among the 25 most significant metabolites in the BLSA cohort only.

Supplementary Table 3b. Logistic regression model results for TMCS cohort.

MetS: Metabolic syndrome; OR: odds ratio; WC: waist circumference; TG: triglyceride; BP: blood pressure; FG: fasting glucose.

| Meta<br>bolit<br>e | MetS<br>OR | MetS<br>p-<br>value | MetS<br>FDR p-<br>value | WC<br>OR | WC<br>p-<br>value | WC<br>FDR p-<br>value | Elev<br>ated<br>TGs<br>OR | Elevate<br>d TGs<br>p-value | Elevate<br>d TGs<br>FDR p-<br>value | Red<br>uced<br>HDL<br>-c<br>OR | Reduced<br>HDL-c p-<br>value | Reduce<br>d HDL-<br>c FDR<br>p-value | BP OR | BP p-<br>valu<br>e | BP<br>FDR<br>p-<br>value | Eleva<br>ted<br>FG<br>OR | Elevate<br>d FG p-<br>value | Elevate<br>d FG<br>FDR p-<br>value |
|--------------------|------------|---------------------|-------------------------|----------|-------------------|-----------------------|---------------------------|-----------------------------|-------------------------------------|--------------------------------|------------------------------|--------------------------------------|-------|--------------------|--------------------------|--------------------------|-----------------------------|------------------------------------|
|--------------------|------------|---------------------|-------------------------|----------|-------------------|-----------------------|---------------------------|-----------------------------|-------------------------------------|--------------------------------|------------------------------|--------------------------------------|-------|--------------------|--------------------------|--------------------------|-----------------------------|------------------------------------|

|                                       |      |           |           |      |           |           |      |           |           |      |           |           |      |           |           |      |           |           |
|---------------------------------------|------|-----------|-----------|------|-----------|-----------|------|-----------|-----------|------|-----------|-----------|------|-----------|-----------|------|-----------|-----------|
| glu*                                  | 2.62 | <1e-07    | <1e-07    | 2.36 | <1e-07    | 3e-07     | 2.16 | <1e-07    | 2e-07     | 1.89 | 1.6e-06   | 0.0001283 | 1.12 | 0.3523812 | 0.610458  | 1.57 | 0.0001596 | 0.0001596 |
| pro*                                  | 2.22 | <1e-07    | 2e-07     | 1.79 | 6.32e-05  | 0.0007683 | 1.61 | 0.0001991 | 0.0040822 | 1.57 | 0.000723  | 0.0197634 | 1.34 | 0.0265016 | 0.1552239 | 1.94 | 2e-07     | 2e-07     |
| meth<br>yl2ox<br>opent<br>anoat<br>e* | 2.18 | <1e-07    | 4e-07     | 1.46 | 0.0101364 | 0.0433872 | 1.76 | 2.07e-05  | 0.0008476 | 1.51 | 0.0026004 | 0.0388544 | 1.48 | 0.0043193 | 0.0698039 | 1.83 | 3.2e-06   | 3.2e-06   |
| ile*                                  | 2.15 | 1e-07     | 2.7e-06   | 1.89 | 7.5e-05   | 0.0007683 | 1.63 | 0.0004407 | 0.0060229 | 1.62 | 0.0010778 | 0.0220948 | 1.14 | 0.3469516 | 0.610458  | 1.52 | 0.0016959 | 0.0016959 |
| muca<br>tet†                          | 0.53 | 2e-07     | 2.7e-06   | 0.54 | 8.1e-06   | 0.000223  | 0.69 | 0.0016342 | 0.0121819 | 0.73 | 0.008216  | 0.0842138 | 0.61 | 9.65e-05  | 0.007535  | 0.72 | 0.0035501 | 0.0035501 |
| leu*                                  | 2.07 | 7e-07     | 9.2e-06   | 2.08 | 6.7e-06   | 0.000223  | 1.62 | 0.0007301 | 0.0073111 | 1.56 | 0.002843  | 0.0388544 | 1.18 | 0.2569146 | 0.5543947 | 1.66 | 0.0002218 | 0.0002218 |
| cysti<br>ne*                          | 1.84 | 1.1e-06   | 1.23e-05  | 1.37 | 0.0194199 | 0.0663514 | 1.5  | 0.000857  | 0.0073111 | 1.77 | 1.39e-05  | 0.0005712 | 1.37 | 0.0110338 | 0.1130964 | 1.43 | 0.0022987 | 0.0022987 |
| alpha<br>amin<br>oadi<br>pate*        | 1.89 | 1.2e-06   | 1.28e-05  | 1.69 | 0.0002892 | 0.0023712 | 1.44 | 0.0032412 | 0.0166114 | 1.36 | 0.0183331 | 0.1503312 | 1.24 | 0.0904601 | 0.3371693 | 1.87 | 6e-07     | 6e-07     |
| oxois<br>opent<br>anoat<br>e*         | 1.74 | 2.7e-06   | 2.47e-05  | 1.43 | 0.0049633 | 0.0254368 | 1.43 | 0.0020456 | 0.0133466 | 1.24 | 0.0748419 | 0.2360398 | 1.19 | 0.1356267 | 0.4277458 | 1.68 | 5.1e-06   | 5.1e-06   |
| ala*                                  | 1.78 | 1.04e-05  | 8.27e-05  | 1.81 | 6.67e-05  | 0.0007683 | 1.53 | 0.0008916 | 0.0073111 | 1.29 | 0.0594141 | 0.2079275 | 1.17 | 0.2397012 | 0.5312296 | 2.1  | 0         | 0         |
| ser†                                  | 0.6  | 1.15e-05  | 8.27e-05  | 0.62 | 0.0001547 | 0.0014096 | 0.68 | 0.0006696 | 0.0073111 | 0.92 | 0.4525585 | 0.6510491 | 0.72 | 0.0051076 | 0.0698039 | 0.93 | 0.5288011 | 0.5288011 |
| val*                                  | 1.8  | 1.21e-05  | 8.27e-05  | 1.86 | 4.26e-05  | 0.0006993 | 1.41 | 0.0084696 | 0.0365529 | 1.29 | 0.0626118 | 0.2079275 | 1.15 | 0.2946837 | 0.5893675 | 1.94 | 4e-07     | 4e-07     |
| gly*                                  | 0.6  | 1.91e-05  | 0.0001206 | 0.83 | 0.1525352 | 0.3474413 | 0.66 | 0.0003288 | 0.0053929 | 0.79 | 0.0502224 | 0.2059116 | 0.87 | 0.2240926 | 0.5312296 | 0.81 | 0.0621333 | 0.0621333 |
| pyru<br>vate*                         | 1.65 | 4.21e-05  | 0.0002467 | 1.18 | 0.2039538 | 0.3981954 | 1.58 | 0.000156  | 0.0040822 | 1.31 | 0.0309918 | 0.1588327 | 1.16 | 0.2380181 | 0.5312296 | 1.37 | 0.0068198 | 0.0068198 |
| phe*                                  | 1.65 | 6.54e-05  | 0.0003565 | 1.57 | 0.0013954 | 0.0081732 | 1.26 | 0.0592481 | 0.147997  | 1.29 | 0.0487467 | 0.2059116 | 1.17 | 0.2107374 | 0.5312296 | 1.48 | 0.0011762 | 0.0011762 |
| tyr*                                  | 1.65 | 6.96e-05  | 0.0003565 | 1.82 | 3.11e-05  | 0.0006379 | 1.2  | 0.132013  | 0.2517457 | 1.13 | 0.3252522 | 0.5674613 | 1.08 | 0.527372  | 0.7862636 | 1.63 | 6.71e-05  | 6.71e-05  |
| trp†                                  | 1.57 | 0.0005496 | 0.0026511 | 1.38 | 0.0280827 | 0.0822421 | 1.39 | 0.010788  | 0.0422899 | 1.22 | 0.1387539 | 0.3670264 | 0.85 | 0.2369036 | 0.5312296 | 1.24 | 0.0843374 | 0.0843374 |
| gln*                                  | 0.67 | 0.0007675 | 0.0034965 | 0.72 | 0.0121765 | 0.0475464 | 0.7  | 0.0023343 | 0.0133466 | 0.89 | 0.3396313 | 0.5683625 | 0.63 | 0.0001838 | 0.007535  | 1.13 | 0.269     | 0.269     |
| hydr<br>oxyb                          | 0.66 | 0.001037  | 0.0044755 | 0.62 | 0.0008483 | 0.0054861 | 0.68 | 0.0024415 | 0.0133466 | 0.77 | 0.0463788 | 0.2059116 | 1.13 | 0.3392838 | 0.610458  | 0.89 | 0.3506441 | 0.3506441 |

|                      |      |           |           |      |           |           |      |           |           |      |           |           |      |           |           |      |           |           |
|----------------------|------|-----------|-----------|------|-----------|-----------|------|-----------|-----------|------|-----------|-----------|------|-----------|-----------|------|-----------|-----------|
| utyrate_3†           |      |           |           |      |           |           |      |           |           |      |           |           |      |           |           |      |           |           |
| guanidinoacetic acid | 0.67 | 0.0014886 | 0.0061034 | 0.67 | 0.0042088 | 0.0230082 | 0.77 | 0.0372914 | 0.1054445 | 0.69 | 0.0044556 | 0.0521944 | 0.92 | 0.4819131 | 0.7456014 | 0.75 | 0.0174133 | 0.0174133 |
| isocitrate*          | 1.42 | 0.0015816 | 0.0061759 | 1.27 | 0.058854  | 0.1664149 | 1.32 | 0.0108303 | 0.0422899 | 1.33 | 0.01407   | 0.1281937 | 1.25 | 0.0492889 | 0.2245385 | 1.2  | 0.0830357 | 0.0830357 |
| hydroxybutyrate_2*   | 1.42 | 0.0016615 | 0.0061929 | 1.05 | 0.6627484 | 0.7978941 | 1.29 | 0.0209631 | 0.0747379 | 1.2  | 0.1129454 | 0.3193628 | 1.21 | 0.0992081 | 0.3536984 | 1.49 | 0.0002462 | 0.0002462 |
| cisacoinite†         | 1.38 | 0.0034581 | 0.0123289 | 1.23 | 0.0961581 | 0.2464052 | 1.2  | 0.0937353 | 0.1970846 | 1.29 | 0.0269692 | 0.1588327 | 1.35 | 0.0100384 | 0.1130964 | 1.26 | 0.0276847 | 0.0276847 |
| lactate*             | 1.38 | 0.0038706 | 0.0129578 | 1.25 | 0.072924  | 0.1993257 | 1.25 | 0.0414458 | 0.1132852 | 1.08 | 0.5055387 | 0.7026131 | 1.27 | 0.0417887 | 0.2119818 | 1.48 | 0.0003441 | 0.0003441 |
| cysteine†            | 1.74 | 0.0039506 | 0.0129578 | 0.9  | 0.6218341 | 0.7725818 | 1.22 | 0.2964591 | 0.4191318 | 1.36 | 0.1305168 | 0.3567459 | 1.32 | 0.1557546 | 0.4561384 | 1.59 | 0.0111618 | 0.0111618 |
| carbamate            | 1.41 | 0.0048575 | 0.0153199 | 1.13 | 0.3781655 | 0.5742513 | 1.3  | 0.0316049 | 0.1036639 | 1.17 | 0.2243061 | 0.4840289 | 1.33 | 0.0253736 | 0.1552239 | 1.31 | 0.0213755 | 0.0213755 |
| urate                | 1.41 | 0.0082618 | 0.0250913 | 1.38 | 0.0254302 | 0.0772324 | 1.12 | 0.361632  | 0.4706956 | 1.05 | 0.7152676 | 0.8146103 | 1.55 | 0.0012661 | 0.0259559 | 1.23 | 0.0910825 | 0.0910825 |
| proline              | 0.73 | 0.0085994 | 0.025184  | 0.99 | 0.9423483 | 0.9678252 | 0.77 | 0.0279537 | 0.0955084 | 0.86 | 0.2164228 | 0.4840289 | 0.97 | 0.7924101 | 0.8952902 | 0.87 | 0.2056081 | 0.2056081 |
| methioninamide       | 1.36 | 0.0100789 | 0.0284989 | 1.24 | 0.1186254 | 0.2947661 | 1.38 | 0.0070373 | 0.0320587 | 1.32 | 0.030222  | 0.1588327 | 0.89 | 0.3714452 | 0.6216022 | 1.19 | 0.1374414 | 0.1374414 |
| citrate              | 0.74 | 0.0105144 | 0.0287393 | 0.88 | 0.3316609 | 0.5230037 | 0.81 | 0.0653865 | 0.1576969 | 0.86 | 0.213209  | 0.4840289 | 0.99 | 0.9211423 | 0.9441708 | 0.98 | 0.8502059 | 0.8502059 |
| acetylbutyrate       | 0.74 | 0.0129538 | 0.0342648 | 0.85 | 0.2349845 | 0.428194  | 0.87 | 0.2467172 | 0.3817134 | 0.9  | 0.4003659 | 0.6258765 | 0.65 | 0.0010959 | 0.0259559 | 0.86 | 0.2126202 | 0.2126202 |
| decanoate            | 0.78 | 0.0138744 | 0.0355531 | 1.04 | 0.753874  | 0.8706714 | 0.81 | 0.034907  | 0.1054445 | 0.9  | 0.3097724 | 0.5644741 | 0.95 | 0.6298989 | 0.8330921 | 0.91 | 0.3370715 | 0.3370715 |
| gamma-tyrosine       | 0.75 | 0.0169674 | 0.0421615 | 0.83 | 0.1766324 | 0.3715661 | 0.79 | 0.0567951 | 0.147997  | 0.91 | 0.4402491 | 0.6446505 | 1.09 | 0.4766899 | 0.7456014 | 0.96 | 0.7365369 | 0.7365369 |

|                          |      |           |           |      |           |           |      |           |           |      |           |           |      |           |           |      |           |           |
|--------------------------|------|-----------|-----------|------|-----------|-----------|------|-----------|-----------|------|-----------|-----------|------|-----------|-----------|------|-----------|-----------|
| betaine                  |      |           |           |      |           |           |      |           |           |      |           |           |      |           |           |      |           |           |
| met                      | 1.27 | 0.0274465 | 0.0661945 | 1.19 | 0.1587971 | 0.3519287 | 1.21 | 0.0694759 | 0.1595625 | 1.29 | 0.0303441 | 0.1588327 | 1.2  | 0.0871191 | 0.3371693 | 1.06 | 0.5353396 | 0.5353396 |
| choline                  | 1.3  | 0.0340543 | 0.0775681 | 1.23 | 0.1321154 | 0.3186312 | 1.13 | 0.3188734 | 0.4357936 | 0.95 | 0.712924  | 0.8146103 | 1.34 | 0.0235181 | 0.1552239 | 1.14 | 0.2816198 | 0.2816198 |
| asn                      | 0.76 | 0.0338922 | 0.0775681 | 0.6  | 0.0004094 | 0.0030521 | 0.76 | 0.0353354 | 0.1054445 | 0.9  | 0.4378067 | 0.6446505 | 0.73 | 0.0218201 | 0.1552239 | 1.11 | 0.3981662 | 0.3981662 |
| betaine                  | 0.79 | 0.0372135 | 0.0824731 | 0.66 | 0.0008697 | 0.0054861 | 0.87 | 0.2259034 | 0.3632172 | 0.94 | 0.6155513 | 0.7765416 | 1.02 | 0.8489268 | 0.8952902 | 0.84 | 0.102113  | 0.102113  |
| threonate                | 0.78 | 0.038376  | 0.0828114 | 0.69 | 0.0060225 | 0.0290496 | 0.83 | 0.1155051 | 0.2310102 | 0.88 | 0.3003408 | 0.559726  | 0.78 | 0.0439474 | 0.2119818 | 0.87 | 0.2300136 | 0.2300136 |
| aminoisobutyrate         | 0.78 | 0.0410745 | 0.0863618 | 0.78 | 0.0882463 | 0.2334256 | 0.7  | 0.004075  | 0.0196557 | 0.78 | 0.0534971 | 0.2064748 | 1.06 | 0.662655  | 0.8530708 | 0.97 | 0.8242875 | 0.8242875 |
| adma                     | 0.79 | 0.0517317 | 0.10605   | 1.09 | 0.5239291 | 0.6874337 | 0.69 | 0.0021507 | 0.0133466 | 0.79 | 0.0633925 | 0.2079275 | 1.09 | 0.5006332 | 0.7602207 | 0.86 | 0.1852417 | 0.1852417 |
| creatine                 | 1.27 | 0.0554638 | 0.1109275 | 1.39 | 0.0214409 | 0.0703263 | 1.3  | 0.0371503 | 0.1054445 | 1.15 | 0.2806597 | 0.5479547 | 1.14 | 0.3233947 | 0.610458  | 1.16 | 0.2205363 | 0.2205363 |
| glycerophosphate         | 1.23 | 0.0575035 | 0.1122688 | 1.08 | 0.5261903 | 0.6874337 | 1.31 | 0.0135377 | 0.0504586 | 1.25 | 0.0553957 | 0.2064748 | 1.01 | 0.9505267 | 0.9505267 | 0.84 | 0.1035899 | 0.1035899 |
| glucuronate              | 1.24 | 0.0633615 | 0.120829  | 1.21 | 0.1436511 | 0.3365541 | 1.2  | 0.1125321 | 0.2306907 | 1.29 | 0.0371629 | 0.1792563 | 1.17 | 0.1962009 | 0.518983  | 1.12 | 0.2939067 | 0.2939067 |
| thr                      | 1.25 | 0.0678853 | 0.1265135 | 1.1  | 0.4759533 | 0.6874337 | 1.19 | 0.1494495 | 0.2785196 | 1.33 | 0.0290924 | 0.1588327 | 1.08 | 0.5451125 | 0.7914604 | 1.26 | 0.0457838 | 0.0457838 |
| succinate                | 0.81 | 0.0739253 | 0.1347083 | 0.71 | 0.0074314 | 0.0338543 | 0.82 | 0.0850456 | 0.1872036 | 0.86 | 0.2047318 | 0.4840289 | 0.98 | 0.8849366 | 0.9185418 | 1.01 | 0.9542538 | 0.9542538 |
| glycerophosphorylcholine | 1.21 | 0.1009621 | 0.1799758 | 0.88 | 0.338883  | 0.5243095 | 1.16 | 0.1995742 | 0.3339813 | 1.08 | 0.4997732 | 0.7026131 | 1.24 | 0.0734745 | 0.3131439 | 0.96 | 0.6774421 | 0.6774421 |
| hippurate                | 0.87 | 0.1418421 | 0.2474691 | 0.98 | 0.8156761 | 0.9038573 | 0.84 | 0.0595598 | 0.147997  | 0.89 | 0.2187963 | 0.4840289 | 0.96 | 0.6762147 | 0.8530708 | 1.06 | 0.4959014 | 0.4959014 |
| uridine                  | 0.86 | 0.1744223 | 0.2979715 | 1.08 | 0.5305258 | 0.6874337 | 0.9  | 0.3315009 | 0.4384367 | 1.02 | 0.8737165 | 0.9068956 | 0.88 | 0.2855774 | 0.5866809 | 0.92 | 0.4432149 | 0.4432149 |
| pipecolate               | 1.17 | 0.1908159 | 0.3193246 | 0.97 | 0.8064285 | 0.9038573 | 0.93 | 0.5546611 | 0.6714583 | 0.89 | 0.3607126 | 0.5799693 | 1.08 | 0.5501615 | 0.7914604 | 1.36 | 0.0098608 | 0.0098608 |

|                                      |      |               |               |      |               |               |      |               |               |      |           |               |      |               |               |      |               |               |
|--------------------------------------|------|---------------|---------------|------|---------------|---------------|------|---------------|---------------|------|-----------|---------------|------|---------------|---------------|------|---------------|---------------|
| trime<br>thyla<br>mine<br>noxi<br>de | 0.87 | 0.21991<br>77 | 0.360665<br>1 | 0.92 | 0.4977<br>627 | 0.68743<br>37 | 0.85 | 0.16131<br>97 | 0.28756<br>99 | 0.85 | 0.1784351 | 0.45724       | 0.93 | 0.567<br>839  | 0.8028<br>069 | 1.07 | 0.54359<br>34 | 0.54359<br>34 |
| terep<br>hthal<br>ate                | 0.88 | 0.26274<br>62 | 0.422454<br>7 | 1.06 | 0.6671<br>82  | 0.79789<br>41 | 0.92 | 0.46430<br>5  | 0.58896<br>07 | 1.01 | 0.9636014 | 0.97549<br>77 | 0.83 | 0.128<br>0571 | 0.4277<br>458 | 0.91 | 0.37614<br>91 | 0.37614<br>91 |
| hydr<br>oxyp<br>rolin<br>e           | 1.13 | 0.30108<br>39 | 0.474786<br>2 | 0.99 | 0.9362<br>399 | 0.96782<br>52 | 1.02 | 0.89451<br>86 | 0.92848<br>77 | 0.97 | 0.7775163 | 0.85008<br>45 | 1.01 | 0.939<br>515  | 0.9505<br>267 | 0.99 | 0.90439<br>27 | 0.90439<br>27 |
| tauri<br>ne                          | 1.12 | 0.31294<br>39 | 0.484177<br>4 | 1.39 | 0.0105<br>822 | 0.04338<br>72 | 1.13 | 0.29631<br>22 | 0.41913<br>18 | 1.32 | 0.0215621 | 0.15883<br>27 | 1.14 | 0.286<br>1858 | 0.5866<br>809 | 0.96 | 0.74230<br>42 | 0.74230<br>42 |
| sdma                                 | 0.89 | 0.32654<br>41 | 0.495863<br>3 | 0.99 | 0.9116<br>036 | 0.96782<br>52 | 0.82 | 0.08675<br>29 | 0.18720<br>36 | 0.81 | 0.0861805 | 0.26173<br>35 | 1.04 | 0.724<br>0414 | 0.8952<br>902 | 0.95 | 0.66702<br>24 | 0.66702<br>24 |
| ornit<br>hine                        | 1.12 | 0.34485<br>19 | 0.497254<br>5 | 1.02 | 0.9021<br>17  | 0.96782<br>52 | 0.96 | 0.69914<br>64 | 0.80111<br>96 | 1.02 | 0.8667852 | 0.90689<br>56 | 0.94 | 0.593<br>3707 | 0.8246<br>847 | 1.08 | 0.48822<br>93 | 0.48822<br>93 |
| his                                  | 1.12 | 0.34565<br>25 | 0.497254<br>5 | 1.19 | 0.2035<br>541 | 0.39819<br>54 | 1.14 | 0.26972<br>72 | 0.40213<br>87 | 1.05 | 0.6808693 | 0.79758<br>97 | 0.97 | 0.823<br>3662 | 0.8952<br>902 | 1.08 | 0.52604<br>47 | 0.52604<br>47 |
| oacet<br>ylcar<br>nitin<br>e         | 1.12 | 0.33812<br>97 | 0.497254<br>5 | 1.08 | 0.5396<br>197 | 0.68743<br>37 | 1.18 | 0.15572<br>41 | 0.28376<br>4  | 0.94 | 0.6259029 | 0.77763<br>69 | 1.19 | 0.146<br>949  | 0.4462<br>895 | 1.17 | 0.16692<br>88 | 0.16692<br>88 |
| trieth<br>anola<br>mine              | 0.92 | 0.36018<br>81 | 0.504029      | 1.1  | 0.3065<br>319 | 0.50271<br>24 | 1.01 | 0.87727<br>98 | 0.92848<br>77 | 1    | 0.9854451 | 0.98544<br>51 | 0.97 | 0.751<br>2542 | 0.8952<br>902 | 0.88 | 0.12163<br>78 | 0.12163<br>78 |
| oxop<br>rolin<br>e                   | 0.9  | 0.36265<br>5  | 0.504029      | 0.87 | 0.2736<br>673 | 0.46751<br>49 | 0.85 | 0.17858<br>91 | 0.31158<br>1  | 1.08 | 0.5285346 | 0.72101<br>63 | 1.03 | 0.794<br>1699 | 0.8952<br>902 | 1.1  | 0.38692<br>29 | 0.38692<br>29 |
| creati<br>nine                       | 0.88 | 0.38978<br>22 | 0.523969<br>5 | 1    | 0.9834<br>402 | 0.99558<br>14 | 0.79 | 0.12752<br>68 | 0.24898<br>08 | 0.88 | 0.435452  | 0.64465<br>05 | 1.22 | 0.219<br>9284 | 0.5312<br>296 | 0.94 | 0.67960<br>11 | 0.67960<br>11 |
| asp                                  | 1.1  | 0.38696<br>25 | 0.523969<br>5 | 1.17 | 0.1952<br>792 | 0.39819<br>54 | 1.11 | 0.32900<br>12 | 0.43843<br>67 | 1.03 | 0.8291434 | 0.88298<br>39 | 0.94 | 0.621<br>5293 | 0.8330<br>921 | 1.03 | 0.80962<br>31 | 0.80962<br>31 |
| indol<br>e3ace<br>tate               | 0.91 | 0.42893<br>96 | 0.561421<br>9 | 0.95 | 0.6713<br>987 | 0.79789<br>41 | 0.89 | 0.28867<br>57 | 0.41913<br>18 | 0.87 | 0.2451881 | 0.50263<br>56 | 0.96 | 0.742<br>0324 | 0.8952<br>902 | 0.98 | 0.88808<br>47 | 0.88808<br>47 |
| octan<br>oate                        | 0.92 | 0.43681<br>24 | 0.561421<br>9 | 0.85 | 0.2124<br>193 | 0.40507<br>87 | 0.99 | 0.91830<br>84 | 0.94126<br>61 | 1.12 | 0.3506689 | 0.57509<br>69 | 1.17 | 0.178<br>9133 | 0.5058<br>926 | 0.87 | 0.21665<br>76 | 0.21665<br>76 |
| oxogl<br>utara<br>te                 | 1.09 | 0.43818<br>29 | 0.561421<br>9 | 0.87 | 0.2427<br>369 | 0.43245<br>6  | 1.13 | 0.26385<br>82 | 0.40067<br>35 | 1.14 | 0.2435027 | 0.50263<br>56 | 1.1  | 0.426<br>0494 | 0.6850<br>206 | 1.01 | 0.93862<br>77 | 0.93862<br>77 |



|                  |      |           |           |      |           |           |      |           |           |      |           |           |      |           |           |      |           |           |
|------------------|------|-----------|-----------|------|-----------|-----------|------|-----------|-----------|------|-----------|-----------|------|-----------|-----------|------|-----------|-----------|
| kynu renine      | 1.1  | 0.4542953 | 0.5728306 | 1.41 | 0.0149833 | 0.0558469 | 1.02 | 0.892805  | 0.9284877 | 0.99 | 0.9138946 | 0.936742  | 1.04 | 0.7820113 | 0.8952902 | 0.85 | 0.164058  | 0.164058  |
| hexanoate        | 0.92 | 0.4610588 | 0.5728306 | 1.08 | 0.5409237 | 0.6874337 | 0.86 | 0.1857352 | 0.3172976 | 0.93 | 0.5658791 | 0.7250326 | 0.98 | 0.8503212 | 0.8952902 | 1    | 0.9798578 | 0.9798578 |
| fumarate         | 0.93 | 0.5338159 | 0.653327  | 0.73 | 0.0161325 | 0.0575158 | 0.94 | 0.5681161 | 0.6714583 | 0.97 | 0.7892515 | 0.8515609 | 1.03 | 0.7934598 | 0.8952902 | 1.03 | 0.7963404 | 0.7963404 |
| methyllistidine  | 1.07 | 0.5592648 | 0.6744076 | 0.85 | 0.2185219 | 0.4072454 | 0.94 | 0.5669478 | 0.6714583 | 0.88 | 0.2991676 | 0.559726  | 1.35 | 0.0193551 | 0.1552239 | 0.98 | 0.8395736 | 0.8395736 |
| betaalanine      | 0.93 | 0.5936341 | 0.7054781 | 1    | 0.9979192 | 0.9979192 | 0.86 | 0.2340482 | 0.3690759 | 0.88 | 0.3390235 | 0.5683625 | 1.03 | 0.8340677 | 0.8952902 | 1.13 | 0.3336538 | 0.3336538 |
| sarcosine        | 1.06 | 0.6372152 | 0.7464521 | 1.09 | 0.5027711 | 0.6874337 | 0.96 | 0.7034221 | 0.8011196 | 0.88 | 0.3224429 | 0.5674613 | 0.95 | 0.6710425 | 0.8530708 | 0.93 | 0.5043462 | 0.5043462 |
| lysine           | 1.06 | 0.6478354 | 0.7482043 | 1.17 | 0.2478711 | 0.432456  | 1.08 | 0.5207917 | 0.6470443 | 1.05 | 0.6716016 | 0.7975897 | 0.76 | 0.0334432 | 0.1828229 | 1.03 | 0.8210561 | 0.8210561 |
| arginine         | 0.96 | 0.7253828 | 0.8261304 | 0.93 | 0.544917  | 0.6874337 | 0.81 | 0.0700518 | 0.1595625 | 0.9  | 0.4045299 | 0.6258765 | 0.94 | 0.6070913 | 0.8296914 | 1.12 | 0.3135873 | 0.3135873 |
| alanine          | 0.96 | 0.7421823 | 0.8336843 | 1.01 | 0.9108972 | 0.9678252 | 0.89 | 0.3138768 | 0.4357936 | 0.86 | 0.2164228 | 0.4840289 | 1.03 | 0.8262343 | 0.8952902 | 1.35 | 0.006937  | 0.006937  |
| citruline        | 0.96 | 0.7532621 | 0.8346959 | 0.74 | 0.0224679 | 0.0708603 | 0.92 | 0.4668591 | 0.5889607 | 1.06 | 0.6498423 | 0.7953294 | 1.24 | 0.0763766 | 0.3131439 | 1.04 | 0.7246392 | 0.7246392 |
| methionine       | 1.03 | 0.7927607 | 0.8611343 | 0.99 | 0.9442197 | 0.9678252 | 0.98 | 0.859585  | 0.9274469 | 1.05 | 0.6641702 | 0.7975897 | 1.21 | 0.1307437 | 0.4277458 | 0.87 | 0.2274901 | 0.2274901 |
| aspartate        | 0.97 | 0.8086261 | 0.8611343 | 0.87 | 0.2862458 | 0.4790235 | 0.99 | 0.9480924 | 0.9513312 | 1.04 | 0.7665218 | 0.849389  | 1.13 | 0.3073078 | 0.599982  | 0.89 | 0.2889727 | 0.2889727 |
| azelaic acid     | 1.03 | 0.7997099 | 0.8611343 | 0.92 | 0.4976907 | 0.6874337 | 1.02 | 0.8563819 | 0.9274469 | 1.07 | 0.5400852 | 0.7210163 | 1.02 | 0.8516175 | 0.8952902 | 0.97 | 0.7499186 | 0.7499186 |
| proline          | 1.02 | 0.8390204 | 0.8820471 | 0.84 | 0.1767205 | 0.3715661 | 1.06 | 0.5731961 | 0.6714583 | 1.07 | 0.548299  | 0.7210163 | 1.17 | 0.1932492 | 0.518983  | 0.94 | 0.56432   | 0.56432   |
| malic acid       | 1.01 | 0.9530853 | 0.9892784 | 0.96 | 0.7266928 | 0.8512687 | 0.88 | 0.2243561 | 0.3632172 | 0.83 | 0.1118293 | 0.3193628 | 1.33 | 0.013918  | 0.1268087 | 1.29 | 0.0171709 | 0.0171709 |
| guanidinoacetate | 1    | 0.9947685 | 0.9947685 | 0.89 | 0.4414985 | 0.6582341 | 1.04 | 0.8045821 | 0.8915639 | 1.05 | 0.7516738 | 0.844346  | 1.15 | 0.3573413 | 0.610458  | 1.06 | 0.6793411 | 0.6793411 |
| glutamate        | 1    | 0.9764001 | 0.9947685 | 0.89 | 0.3238293 | 0.5206667 | 0.99 | 0.9513312 | 0.9513312 | 1.13 | 0.2771713 | 0.5479547 | 1.1  | 0.4047699 | 0.6638226 | 0.97 | 0.784439  | 0.784439  |

|                        |   |               |               |      |               |               |      |              |               |      |           |               |      |               |              |      |               |               |
|------------------------|---|---------------|---------------|------|---------------|---------------|------|--------------|---------------|------|-----------|---------------|------|---------------|--------------|------|---------------|---------------|
| indo<br>xylsu<br>lfate | 1 | 0.98877<br>84 | 0.994768<br>5 | 1.04 | 0.7791<br>947 | 0.88741<br>62 | 1.04 | 0.73458<br>4 | 0.82514<br>92 | 1.07 | 0.5539515 | 0.72101<br>63 | 0.89 | 0.338<br>9133 | 0.6104<br>58 | 0.92 | 0.46154<br>73 | 0.46154<br>73 |
|------------------------|---|---------------|---------------|------|---------------|---------------|------|--------------|---------------|------|-----------|---------------|------|---------------|--------------|------|---------------|---------------|

\* Indicates a metabolite among the 25 most significant metabolites in both BLSA and TMCS.

† Indicates a metabolite which is among the 25 most significant metabolites in the TMCS cohort only.

Supplementary Table 4a. Sensitivity analysis results for BLSA cohort. P-values are FDR-adjusted. Model includes smoking status and physical activity as covariates, in addition to age, sex, and sample storage time.

MetS: metabolic syndrome; OR: odds ratio; WC: waist circumference; TG: triglycerides; BP: blood pressure

| Metabolite            | MetS<br>OR | MetS p-<br>value | WC<br>OR | WC p-<br>value | TG<br>OR | TG p-<br>value | HDL-<br>C OR | HDL-C<br>p-value | BP<br>OR | BP p-<br>value | Elevated<br>Glucose<br>OR | Elevated<br>Glucose<br>p-value |
|-----------------------|------------|------------------|----------|----------------|----------|----------------|--------------|------------------|----------|----------------|---------------------------|--------------------------------|
| alphaaminoadipate*    | 2.59       | 0.003504         | 2.16     | 0.016959       | 1.71     | 0.168767       | 1.42         | 0.32553          | 1.52     | 0.511848       | 2.37                      | 0.000293                       |
| urate*                | 2.67       | 0.003504         | 3.03     | 0.000876       | 1.67     | 0.19345        | 1.45         | 0.328729         | 1.35     | 0.872155       | 2.54                      | 0.00029                        |
| oxoglutarate*         | 2.22       | 0.007516         | 1.94     | 0.016959       | 2.09     | 0.059736       | 2.17         | 0.030505         | 1.18     | 0.930454       | 1.66                      | 0.015762                       |
| hydroxybutyrate_2*    | 2.06       | 0.008992         | 2.01     | 0.016959       | 1.43     | 0.302552       | 1.56         | 0.223648         | 1.5      | 0.511848       | 2.17                      | 0.000319                       |
| glu*                  | 2.21       | 0.015586         | 2.23     | 0.016959       | 1.72     | 0.168767       | 2.18         | 0.042489         | 1.02     | 0.960241       | 1.63                      | 0.038901                       |
| phe*                  | 1.89       | 0.017502         | 1.55     | 0.100897       | 1.9      | 0.059736       | 1.8          | 0.073651         | 1.16     | 0.930454       | 1.15                      | 0.45676                        |
| asn*                  | 0.53       | 0.018051         | 0.54     | 0.016959       | 0.7      | 0.302552       | 0.76         | 0.397718         | 0.76     | 0.732393       | 0.93                      | 0.696113                       |
| methyl2oxopentanoate* | 2.07       | 0.023766         | 2.06     | 0.024128       | 1.7      | 0.192184       | 1.7          | 0.223648         | 1.32     | 0.872155       | 2.48                      | 0.000442                       |
| glucuronate*          | 1.84       | 0.023766         | 1.32     | 0.418777       | 1.72     | 0.093315       | 1.43         | 0.288718         | 1.36     | 0.732393       | 1.45                      | 0.062334                       |
| gly*                  | 0.51       | 0.029611         | 0.58     | 0.090524       | 0.54     | 0.093315       | 0.84         | 0.67919          | 0.6      | 0.511848       | 1.14                      | 0.564096                       |
| cystine*              | 1.91       | 0.031284         | 1.96     | 0.029289       | 1.95     | 0.081744       | 1.69         | 0.192278         | 1.6      | 0.511848       | 1.04                      | 0.861478                       |
| ile*                  | 1.97       | 0.033997         | 2.03     | 0.027269       | 1.39     | 0.492457       | 1.63         | 0.264243         | 0.87     | 0.950561       | 1.75                      | 0.022485                       |
| leu*                  | 1.85       | 0.044079         | 1.75     | 0.080657       | 1.57     | 0.244738       | 1.87         | 0.112628         | 1.19     | 0.930454       | 1.46                      | 0.094507                       |
| gln*                  | 0.57       | 0.049627         | 0.67     | 0.218875       | 0.79     | 0.553512       | 0.82         | 0.592118         | 0.75     | 0.832265       | 0.84                      | 0.415991                       |
| oxoisopentanoate*     | 1.7        | 0.049627         | 1.83     | 0.027269       | 1.62     | 0.168767       | 1.41         | 0.312099         | 1.52     | 0.511848       | 1.78                      | 0.005911                       |
| tyr*                  | 1.66       | 0.050039         | 1.9      | 0.016959       | 1.76     | 0.081744       | 1.45         | 0.288718         | 1.33     | 0.740073       | 1.3                       | 0.186388                       |

|                          |      |          |      |          |      |          |      |          |      |          |      |          |
|--------------------------|------|----------|------|----------|------|----------|------|----------|------|----------|------|----------|
| ala*                     | 1.73 | 0.052472 | 2.07 | 0.016959 | 1.3  | 0.520403 | 1.29 | 0.495407 | 1.06 | 0.960241 | 1.99 | 0.002691 |
| carnitine*               | 1.66 | 0.052472 | 1.22 | 0.65523  | 1.53 | 0.201019 | 1.37 | 0.32553  | 1.52 | 0.511848 | 1.65 | 0.015992 |
| guanidinoacetate*        | 0.58 | 0.094973 | 0.9  | 0.779568 | 0.64 | 0.271838 | 0.77 | 0.530895 | 0.7  | 0.732393 | 1.25 | 0.338188 |
| pro*                     | 1.59 | 0.104943 | 1.46 | 0.250727 | 1.32 | 0.492457 | 1.47 | 0.288718 | 1.57 | 0.511848 | 1.82 | 0.005966 |
| lactate*                 | 1.64 | 0.108633 | 3.37 | 0.000405 | 1.24 | 0.609962 | 1.65 | 0.223648 | 1.1  | 0.959654 | 1.79 | 0.013785 |
| pyruvate*                | 1.44 | 0.154223 | 1.63 | 0.046708 | 1.44 | 0.244738 | 1.29 | 0.412057 | 1.02 | 0.960241 | 1.31 | 0.13641  |
| val*                     | 1.47 | 0.220282 | 1.58 | 0.125266 | 1.48 | 0.297793 | 1.47 | 0.288718 | 1.04 | 0.960241 | 1.45 | 0.083642 |
| uridine*                 | 1.43 | 0.274623 | 1.12 | 0.75492  | 1.83 | 0.081744 | 1.55 | 0.264243 | 0.99 | 0.967436 | 1.31 | 0.203698 |
| betaala                  | 1.4  | 0.338084 | 1.16 | 0.713168 | 1.23 | 0.609962 | 1.24 | 0.586819 | 1.16 | 0.939396 | 1.4  | 0.125971 |
| taurine                  | 0.74 | 0.338084 | 0.95 | 0.856218 | 0.96 | 0.910765 | 1.25 | 0.530895 | 0.8  | 0.872155 | 0.68 | 0.051472 |
| asp                      | 1.34 | 0.338084 | 1.32 | 0.412959 | 1.22 | 0.573631 | 1.44 | 0.288718 | 0.87 | 0.930454 | 0.95 | 0.766987 |
| isocitrate               | 1.38 | 0.338084 | 1.16 | 0.713168 | 1.13 | 0.795265 | 1.03 | 0.950985 | 1.52 | 0.511848 | 0.95 | 0.815975 |
| nacetylaspartate         | 0.75 | 0.346995 | 0.84 | 0.67359  | 0.53 | 0.059736 | 0.59 | 0.112628 | 1.08 | 0.959654 | 0.9  | 0.597693 |
| hydroxyproline           | 1.35 | 0.349877 | 1.34 | 0.417447 | 1.11 | 0.795265 | 0.91 | 0.842973 | 1.37 | 0.732393 | 1.3  | 0.21741  |
| oxoproline               | 0.72 | 0.354158 | 0.9  | 0.763659 | 0.59 | 0.168767 | 0.79 | 0.530895 | 1.06 | 0.960241 | 1.24 | 0.32183  |
| kynurenine               | 1.31 | 0.429825 | 1.42 | 0.275095 | 1.31 | 0.492457 | 1.36 | 0.342989 | 1.48 | 0.511848 | 0.93 | 0.733171 |
| methylhistidine          | 1.27 | 0.517071 | 0.89 | 0.75492  | 1.4  | 0.344524 | 1.15 | 0.712023 | 1.22 | 0.899208 | 1.2  | 0.36131  |
| glycerophosphate         | 0.72 | 0.517071 | 0.59 | 0.218875 | 0.7  | 0.492457 | 1.02 | 0.954729 | 1.03 | 0.960241 | 1.08 | 0.778851 |
| trp                      | 1.28 | 0.539578 | 1.22 | 0.67359  | 1.23 | 0.609962 | 1.52 | 0.273272 | 1.18 | 0.930454 | 1.45 | 0.089062 |
| hydroxybutyrate_3        | 1.24 | 0.63987  | 1.05 | 0.87524  | 1.32 | 0.492457 | 1.24 | 0.539355 | 0.98 | 0.960241 | 1.2  | 0.382616 |
| creatine                 | 1.25 | 0.690127 | 1.14 | 0.75492  | 1.05 | 0.907318 | 1.15 | 0.756692 | 1.27 | 0.899208 | 2.11 | 0.002712 |
| ab                       | 1.19 | 0.742011 | 1.2  | 0.67359  | 1.12 | 0.795265 | 1.31 | 0.447818 | 1.07 | 0.960241 | 1.97 | 0.002501 |
| nndimethylglycine        | 1.2  | 0.742011 | 1.28 | 0.532224 | 1.27 | 0.53401  | 1.53 | 0.264243 | 0.97 | 0.960241 | 1.18 | 0.430743 |
| creatinine               | 1.28 | 0.742011 | 0.86 | 0.75492  | 1.22 | 0.762074 | 0.94 | 0.914243 | 1.24 | 0.930454 | 0.84 | 0.532389 |
| betaine                  | 1.17 | 0.742011 | 0.86 | 0.682365 | 1.32 | 0.492457 | 1.27 | 0.494304 | 1.12 | 0.950561 | 0.99 | 0.950471 |
| lys                      | 0.85 | 0.742011 | 0.73 | 0.411068 | 1.01 | 0.977739 | 1.04 | 0.914243 | 1.05 | 0.960241 | 1.14 | 0.511906 |
| glycerophosphorylcholine | 1.2  | 0.742011 | 1.07 | 0.836301 | 1.14 | 0.795265 | 0.99 | 0.954729 | 0.97 | 0.960241 | 1.34 | 0.18873  |
| glutarate                | 0.82 | 0.742011 | 1.25 | 0.631809 | 0.84 | 0.682553 | 0.87 | 0.756692 | 1.22 | 0.907867 | 0.95 | 0.825874 |
| indoxylsulfate           | 1.18 | 0.742011 | 1.17 | 0.682365 | 1.2  | 0.650787 | 1.09 | 0.850141 | 1.12 | 0.950561 | 1.24 | 0.287785 |
| adma                     | 0.85 | 0.745116 | 1.23 | 0.65523  | 1    | 0.997248 | 1.06 | 0.881884 | 0.97 | 0.960241 | 0.86 | 0.442076 |
| acetylbutyrate           | 1.16 | 0.771813 | 1.04 | 0.895267 | 1.16 | 0.761385 | 1.03 | 0.954729 | 1.1  | 0.959654 | 1.15 | 0.481276 |

|                      |      |          |      |          |      |          |      |          |      |          |      |          |
|----------------------|------|----------|------|----------|------|----------|------|----------|------|----------|------|----------|
| malate               | 1.18 | 0.791959 | 1.65 | 0.125266 | 0.76 | 0.53401  | 1.13 | 0.802358 | 1.13 | 0.950561 | 1.72 | 0.023626 |
| sdma                 | 0.86 | 0.83771  | 0.73 | 0.470717 | 1.12 | 0.795265 | 1.02 | 0.954729 | 0.82 | 0.930454 | 0.8  | 0.33801  |
| gammabutyrobetaine   | 0.88 | 0.83876  | 0.73 | 0.411068 | 0.95 | 0.903294 | 0.82 | 0.592118 | 0.9  | 0.952525 | 1    | 0.981483 |
| cysteinessulfate     | 1.26 | 0.83876  | 1.22 | 0.75492  | 0.91 | 0.903294 | 1.84 | 0.32553  | 0.94 | 0.960241 | 1.16 | 0.70594  |
| mucate               | 0.88 | 0.83876  | 0.94 | 0.836301 | 1.01 | 0.977739 | 0.95 | 0.881884 | 1.29 | 0.872155 | 0.83 | 0.359549 |
| indole3acetate       | 1.13 | 0.842548 | 1.74 | 0.047869 | 1.32 | 0.492457 | 1.02 | 0.954729 | 0.91 | 0.959654 | 1.08 | 0.729786 |
| azelate              | 1.95 | 0.842548 | 0.52 | 0.75492  | 4.79 | 0.492457 | 2.52 | 0.67919  | 1.25 | 0.960241 | 5.51 | 0.14314  |
| pipecolate           | 1.11 | 0.849698 | 0.92 | 0.779568 | 1.23 | 0.573631 | 1.06 | 0.881884 | 1.14 | 0.939396 | 1.07 | 0.744552 |
| ornithine            | 1.1  | 0.869292 | 1.19 | 0.67359  | 0.92 | 0.812255 | 1.38 | 0.32553  | 1.02 | 0.960241 | 1.17 | 0.43854  |
| triethanolamine      | 1.11 | 0.869292 | 1.03 | 0.920316 | 1.39 | 0.492457 | 1.5  | 0.312099 | 0.69 | 0.732393 | 1.03 | 0.901556 |
| his                  | 0.91 | 0.869292 | 0.91 | 0.768352 | 1.31 | 0.492457 | 1.11 | 0.772402 | 1.21 | 0.899208 | 1.23 | 0.275153 |
| citrulline           | 0.9  | 0.869292 | 0.81 | 0.67359  | 1.12 | 0.795265 | 0.98 | 0.954729 | 0.8  | 0.899208 | 1.16 | 0.507248 |
| pelargonate          | 0.86 | 0.869292 | 1.25 | 0.713168 | 1.17 | 0.795265 | 0.9  | 0.881884 | 0.72 | 0.899208 | 1.33 | 0.3727   |
| decanoate            | 1.1  | 0.869292 | 0.89 | 0.75492  | 1.04 | 0.910765 | 0.89 | 0.772402 | 1.19 | 0.930454 | 1.08 | 0.723956 |
| thr                  | 0.94 | 0.932001 | 1    | 0.989166 | 0.91 | 0.795265 | 0.89 | 0.756692 | 1.24 | 0.872155 | 1.17 | 0.396508 |
| sarcosine            | 0.96 | 0.938287 | 0.88 | 0.713168 | 1.25 | 0.53401  | 1.13 | 0.756692 | 1.08 | 0.959654 | 1.11 | 0.563201 |
| aminoisobutyrate     | 0.95 | 0.938287 | 0.89 | 0.75492  | 1.04 | 0.910765 | 1.18 | 0.67919  | 1.19 | 0.930454 | 0.88 | 0.557099 |
| ser                  | 1.05 | 0.938287 | 0.89 | 0.763659 | 0.92 | 0.857854 | 1.37 | 0.414364 | 0.71 | 0.732393 | 1.15 | 0.536164 |
| methylnicotinamide   | 1.06 | 0.938287 | 0.81 | 0.630215 | 1.37 | 0.396693 | 1.06 | 0.881884 | 1.05 | 0.960241 | 0.71 | 0.086909 |
| arg                  | 1.06 | 0.938287 | 1.28 | 0.545127 | 0.88 | 0.795265 | 0.78 | 0.495407 | 1.03 | 0.960241 | 1.75 | 0.010666 |
| guanidinosuccinate   | 0.95 | 0.938287 | 0.85 | 0.682365 | 0.91 | 0.795265 | 0.79 | 0.530895 | 0.91 | 0.959654 | 0.86 | 0.476406 |
| fumarate             | 1.07 | 0.938287 | 1.31 | 0.532224 | 0.9  | 0.795265 | 1.26 | 0.546855 | 1.02 | 0.960241 | 1.24 | 0.320285 |
| succinate            | 1.05 | 0.938287 | 1.64 | 0.125266 | 0.86 | 0.795265 | 0.99 | 0.954729 | 1.28 | 0.899208 | 1.17 | 0.503579 |
| threonate            | 0.94 | 0.938287 | 0.99 | 0.972536 | 1.24 | 0.586376 | 1.45 | 0.312099 | 0.89 | 0.950561 | 0.96 | 0.850221 |
| hippurate            | 0.95 | 0.938287 | 1.07 | 0.836301 | 1.06 | 0.886    | 0.9  | 0.772402 | 0.99 | 0.967436 | 0.96 | 0.812896 |
| citrate              | 0.94 | 0.938287 | 0.77 | 0.470717 | 0.9  | 0.795265 | 0.78 | 0.494304 | 1.15 | 0.939396 | 0.79 | 0.223846 |
| trimethylaminenoxide | 1.01 | 0.961168 | 1.18 | 0.67359  | 0.92 | 0.795265 | 0.84 | 0.643462 | 0.92 | 0.959654 | 1.1  | 0.627912 |
| prolinebetaine       | 0.97 | 0.961168 | 1.22 | 0.67359  | 0.83 | 0.621273 | 0.92 | 0.86509  | 0.89 | 0.950561 | 0.88 | 0.530471 |
| met                  | 1.02 | 0.961168 | 0.93 | 0.836301 | 0.99 | 0.977739 | 0.93 | 0.881884 | 1.14 | 0.950561 | 1.31 | 0.253366 |
| oacetylcarnitine     | 1.02 | 0.961168 | 0.84 | 0.708407 | 1.1  | 0.800396 | 1.1  | 0.849398 | 0.92 | 0.960241 | 1.17 | 0.473693 |
| hexanoate            | 1.01 | 0.961168 | 0.96 | 0.895267 | 0.75 | 0.492457 | 0.82 | 0.592118 | 1.45 | 0.522923 | 1.2  | 0.348128 |

|               |      |          |      |          |      |          |      |          |      |          |      |          |
|---------------|------|----------|------|----------|------|----------|------|----------|------|----------|------|----------|
| octanoate     | 1.02 | 0.961168 | 0.85 | 0.682365 | 1.02 | 0.977739 | 0.84 | 0.67919  | 0.88 | 0.950561 | 1.35 | 0.144585 |
| terephthalate | 1.03 | 0.961168 | 0.95 | 0.856218 | 0.8  | 0.53401  | 1.09 | 0.842973 | 1.02 | 0.960241 | 1.24 | 0.270408 |
| choline       | 1.02 | 0.971392 | 1.31 | 0.67359  | 0.83 | 0.795265 | 1.11 | 0.881884 | 1.03 | 0.960241 | 1.16 | 0.646545 |
| cisaconitate  | 1    | 0.980559 | 1.01 | 0.97549  | 0.89 | 0.795265 | 0.86 | 0.67919  | 1.26 | 0.872155 | 1.05 | 0.790358 |

\* Indicates metabolite among the top 25 highest ranked metabolites in original and sensitivity analyses.

Supplementary Table 4b. Sensitivity analysis results for TMCS cohort. P-values are FDR-adjusted. Model includes smoking status, physical activity, and diet quality (DASH score) as covariates, in addition to age and sex.

MetS: metabolic syndrome; OR: odds ratio; WC: waist circumference; TG: triglycerides; BP: blood pressure

| Metabolite            | MetS OR | MetS p-value | WC OR | WC p-value | TG OR | TG p-value | HDL-C OR | HDL-C p-value | BP OR | BP p-value | Elevated Glucose OR | Elevated Glucose p-value |
|-----------------------|---------|--------------|-------|------------|-------|------------|----------|---------------|-------|------------|---------------------|--------------------------|
| glu*                  | 2.64    | 0.00000000   | 2.38  | 0.00000036 | 2.16  | 0.00000021 | 1.91     | 0.00010283    | 1.13  | 0.60431881 | 1.57                | 0.0001775                |
| pro*                  | 2.22    | 0.00000024   | 1.8   | 0.00082675 | 1.6   | 0.00507551 | 1.57     | 0.01923624    | 1.36  | 0.14417664 | 1.97                | 0.0000002                |
| methyl2oxopentanoate* | 2.2     | 0.00000040   | 1.47  | 0.03901921 | 1.75  | 0.00101217 | 1.52     | 0.03583563    | 1.49  | 0.06585662 | 1.83                | 0.00000345               |
| mucate*               | 0.52    | 0.00000227   | 0.54  | 0.00025569 | 0.69  | 0.00938861 | 0.71     | 0.05732442    | 0.6   | 0.00572203 | 0.72                | 0.00316642               |
| ile*                  | 2.16    | 0.00000241   | 1.89  | 0.00082675 | 1.63  | 0.00724953 | 1.64     | 0.01923624    | 1.15  | 0.5989992  | 1.51                | 0.00200291               |
| leu*                  | 2.08    | 0.00000961   | 2.09  | 0.00025569 | 1.61  | 0.00773205 | 1.58     | 0.03583563    | 1.19  | 0.536308   | 1.66                | 0.00026311               |
| cystine*              | 1.85    | 0.00001077   | 1.38  | 0.06422082 | 1.51  | 0.0075247  | 1.77     | 0.00057377    | 1.37  | 0.11633573 | 1.43                | 0.00202566               |
| alphaaminoadipate*    | 1.89    | 0.00001308   | 1.69  | 0.00254758 | 1.44  | 0.01843843 | 1.37     | 0.13943564    | 1.25  | 0.31241677 | 1.86                | 0.00000037               |
| oxoisopentanoate*     | 1.74    | 0.00002808   | 1.45  | 0.02324752 | 1.42  | 0.01425581 | 1.23     | 0.27361095    | 1.19  | 0.42148781 | 1.69                | 0.00000517               |
| val*                  | 1.82    | 0.00008569   | 1.88  | 0.00071557 | 1.4   | 0.04294591 | 1.3      | 0.21560531    | 1.16  | 0.54145667 | 1.95                | 0.00000046               |
| ala*                  | 1.78    | 0.00009032   | 1.82  | 0.00082675 | 1.52  | 0.00938861 | 1.28     | 0.21560531    | 1.17  | 0.536308   | 2.12                | 0.00000001               |
| ser*                  | 0.6     | 0.00009032   | 0.62  | 0.00151072 | 0.68  | 0.0075247  | 0.92     | 0.66866017    | 0.72  | 0.07307326 | 0.93                | 0.51979248               |
| gly*                  | 0.6     | 0.00013582   | 0.83  | 0.31971331 | 0.66  | 0.00672587 | 0.8      | 0.21560531    | 0.87  | 0.536308   | 0.81                | 0.06369461               |
| phe*                  | 1.67    | 0.00028291   | 1.55  | 0.01110651 | 1.26  | 0.14790556 | 1.32     | 0.16592128    | 1.2   | 0.47839015 | 1.47                | 0.00148564               |
| pyruvate*             | 1.64    | 0.00028455   | 1.19  | 0.37874834 | 1.57  | 0.00507551 | 1.3      | 0.17473316    | 1.15  | 0.54145667 | 1.37                | 0.00708499               |
| tyr*                  | 1.65    | 0.00037221   | 1.81  | 0.00071557 | 1.2   | 0.2599817  | 1.15     | 0.54230726    | 1.1   | 0.73072897 | 1.63                | 0.00006902               |

|                          |      |            |      |            |      |            |      |            |      |            |      |            |
|--------------------------|------|------------|------|------------|------|------------|------|------------|------|------------|------|------------|
| trp*                     | 1.57 | 0.00301103 | 1.37 | 0.09423389 | 1.39 | 0.04395856 | 1.22 | 0.36558574 | 0.85 | 0.536308   | 1.24 | 0.0857992  |
| gln*                     | 0.67 | 0.00335107 | 0.72 | 0.04734143 | 0.7  | 0.0141255  | 0.89 | 0.58179287 | 0.63 | 0.00748416 | 1.13 | 0.27965159 |
| hydroxybutyrate_3*       | 0.66 | 0.00455086 | 0.62 | 0.00670049 | 0.68 | 0.01418798 | 0.76 | 0.17473316 | 1.13 | 0.62189875 | 0.89 | 0.34851697 |
| hydroxybutyrate_2*       | 1.43 | 0.0058531  | 1.06 | 0.7565462  | 1.29 | 0.07730852 | 1.21 | 0.30098789 | 1.22 | 0.31241677 | 1.48 | 0.00026842 |
| guanidinosuccinate*      | 0.67 | 0.00676526 | 0.67 | 0.02335239 | 0.77 | 0.11541309 | 0.69 | 0.05732442 | 0.92 | 0.73072897 | 0.75 | 0.01593072 |
| isocitrate*              | 1.41 | 0.0078071  | 1.26 | 0.17456347 | 1.32 | 0.04395856 | 1.33 | 0.1334042  | 1.25 | 0.24875312 | 1.2  | 0.08516526 |
| cisaconitate*            | 1.38 | 0.01280508 | 1.23 | 0.23537282 | 1.2  | 0.19955341 | 1.29 | 0.16018882 | 1.34 | 0.11633573 | 1.27 | 0.02615708 |
| cysteinessulfate*        | 1.75 | 0.01295669 | 0.89 | 0.74426822 | 1.22 | 0.42123835 | 1.38 | 0.3181341  | 1.34 | 0.42148781 | 1.58 | 0.01265173 |
| carnitine                | 1.42 | 0.01485775 | 1.13 | 0.58944292 | 1.3  | 0.10284549 | 1.17 | 0.48670012 | 1.34 | 0.14417664 | 1.3  | 0.02273369 |
| lactate                  | 1.37 | 0.01632867 | 1.27 | 0.17456347 | 1.24 | 0.13966941 | 1.06 | 0.78420522 | 1.26 | 0.24875312 | 1.49 | 0.00030211 |
| prolinebetaine           | 0.73 | 0.02340085 | 0.99 | 0.97941508 | 0.77 | 0.09817972 | 0.85 | 0.48010038 | 0.96 | 0.87253997 | 0.87 | 0.22390034 |
| methylnicotinamide       | 1.37 | 0.02558004 | 1.24 | 0.27728975 | 1.38 | 0.03313579 | 1.32 | 0.16018882 | 0.89 | 0.64207586 | 1.18 | 0.13997823 |
| urate                    | 1.4  | 0.02558004 | 1.4  | 0.06643281 | 1.11 | 0.51402745 | 1.04 | 0.88473577 | 1.54 | 0.02817807 | 1.23 | 0.09474488 |
| citrate                  | 0.74 | 0.02842781 | 0.9  | 0.6207563  | 0.8  | 0.14882144 | 0.84 | 0.43371405 | 0.98 | 0.87929535 | 0.98 | 0.855367   |
| acetylbutyrate           | 0.74 | 0.03672802 | 0.85 | 0.42323082 | 0.87 | 0.41306541 | 0.9  | 0.63514625 | 0.65 | 0.02817807 | 0.86 | 0.21512872 |
| decanoate                | 0.78 | 0.03672802 | 1.04 | 0.83225828 | 0.81 | 0.10294496 | 0.89 | 0.54230726 | 0.95 | 0.83606271 | 0.91 | 0.31257922 |
| gammabutyrobetaine       | 0.75 | 0.04078593 | 0.83 | 0.35750186 | 0.8  | 0.14882144 | 0.91 | 0.66672024 | 1.09 | 0.73072897 | 0.97 | 0.7708093  |
| met                      | 1.27 | 0.06451336 | 1.19 | 0.35750186 | 1.21 | 0.16504596 | 1.3  | 0.16018882 | 1.22 | 0.2986555  | 1.06 | 0.56278541 |
| choline                  | 1.31 | 0.06691132 | 1.22 | 0.31971331 | 1.14 | 0.42123835 | 0.96 | 0.88473577 | 1.36 | 0.14417664 | 1.14 | 0.28074314 |
| asn                      | 0.76 | 0.0788237  | 0.59 | 0.00271157 | 0.76 | 0.10658931 | 0.9  | 0.66866017 | 0.73 | 0.14417664 | 1.11 | 0.40751165 |
| threonate                | 0.78 | 0.08231969 | 0.69 | 0.03465907 | 0.83 | 0.21761762 | 0.87 | 0.54230726 | 0.77 | 0.19479229 | 0.87 | 0.2343162  |
| aminoisobutyrate         | 0.78 | 0.09809048 | 0.79 | 0.23537282 | 0.7  | 0.02094377 | 0.78 | 0.21560531 | 1.06 | 0.83606271 | 0.97 | 0.81015559 |
| betaine                  | 0.8  | 0.09809048 | 0.65 | 0.0049452  | 0.89 | 0.42123835 | 0.96 | 0.8436845  | 1.03 | 0.87253997 | 0.84 | 0.11359415 |
| adma                     | 0.79 | 0.09809048 | 1.08 | 0.72654379 | 0.69 | 0.01425581 | 0.79 | 0.21560531 | 1.09 | 0.73072897 | 0.85 | 0.17653904 |
| glycerophosphate         | 1.24 | 0.10568615 | 1.07 | 0.72654379 | 1.32 | 0.04395856 | 1.26 | 0.17776922 | 1.01 | 0.90062258 | 0.84 | 0.10021517 |
| creatine                 | 1.27 | 0.1129115  | 1.39 | 0.06643281 | 1.3  | 0.11426202 | 1.15 | 0.54230726 | 1.14 | 0.5989992  | 1.16 | 0.22059926 |
| thr                      | 1.25 | 0.12144457 | 1.09 | 0.72654379 | 1.2  | 0.26732714 | 1.34 | 0.15680586 | 1.09 | 0.73072897 | 1.26 | 0.04891578 |
| glucuronate              | 1.24 | 0.12144457 | 1.21 | 0.33201496 | 1.21 | 0.21687033 | 1.29 | 0.17473316 | 1.18 | 0.48673411 | 1.13 | 0.28741221 |
| succinate                | 0.82 | 0.15387944 | 0.71 | 0.03505722 | 0.83 | 0.19955341 | 0.86 | 0.49776373 | 0.98 | 0.90062258 | 1.01 | 0.93463158 |
| glycerophosphorylcholine | 1.2  | 0.18959284 | 0.89 | 0.56557374 | 1.16 | 0.33471847 | 1.07 | 0.74699525 | 1.23 | 0.31241677 | 0.96 | 0.70960523 |
| hippurate                | 0.87 | 0.25213492 | 0.98 | 0.91771705 | 0.84 | 0.15248053 | 0.89 | 0.49533297 | 0.96 | 0.84322506 | 1.07 | 0.47478475 |
| uridine                  | 0.85 | 0.27811066 | 1.09 | 0.71371864 | 0.89 | 0.42271879 | 1.01 | 0.96203809 | 0.88 | 0.54145667 | 0.92 | 0.44911107 |
| pipecolate               | 1.18 | 0.2974047  | 0.97 | 0.90851633 | 0.94 | 0.68991995 | 0.89 | 0.58586768 | 1.08 | 0.77473483 | 1.37 | 0.00889799 |

|                      |      |            |      |            |      |            |      |            |      |            |      |            |
|----------------------|------|------------|------|------------|------|------------|------|------------|------|------------|------|------------|
| trimethylaminenoxide | 0.87 | 0.36210681 | 0.91 | 0.70944136 | 0.85 | 0.29118846 | 0.85 | 0.45478014 | 0.93 | 0.79627603 | 1.07 | 0.54612565 |
| terephthalate        | 0.88 | 0.45834363 | 1.05 | 0.83225828 | 0.92 | 0.62889763 | 1.02 | 0.90375286 | 0.84 | 0.45524655 | 0.9  | 0.33949598 |
| hydroxyproline       | 1.13 | 0.4792436  | 0.98 | 0.93761491 | 1.02 | 0.92011798 | 0.97 | 0.88473577 | 1.02 | 0.90062258 | 0.99 | 0.92383448 |
| taurine              | 1.12 | 0.4868834  | 1.39 | 0.0445761  | 1.12 | 0.42123835 | 1.32 | 0.15680586 | 1.14 | 0.57629548 | 0.96 | 0.7372267  |
| sdma                 | 0.89 | 0.4868834  | 0.98 | 0.93761491 | 0.82 | 0.19828081 | 0.81 | 0.27535167 | 1.05 | 0.84419154 | 0.95 | 0.67773323 |
| oacetylcarnitine     | 1.12 | 0.4868834  | 1.08 | 0.72654379 | 1.18 | 0.27825409 | 0.95 | 0.81590113 | 1.2  | 0.42148781 | 1.17 | 0.1736462  |
| ornithine            | 1.12 | 0.49121407 | 1.01 | 0.97941508 | 0.96 | 0.81359652 | 1.03 | 0.88572635 | 0.94 | 0.83606271 | 1.08 | 0.48708459 |
| creatinine           | 0.87 | 0.50311349 | 1    | 0.98980912 | 0.79 | 0.22565794 | 0.87 | 0.60247446 | 1.21 | 0.536308   | 0.94 | 0.68073668 |
| triethanolamine      | 0.92 | 0.50311349 | 1.11 | 0.4685006  | 1.01 | 0.92011798 | 1    | 0.99226349 | 0.97 | 0.87253997 | 0.88 | 0.11922928 |
| his                  | 1.12 | 0.50311349 | 1.19 | 0.40481225 | 1.14 | 0.42123835 | 1.05 | 0.82070676 | 0.97 | 0.87929535 | 1.08 | 0.53709214 |
| oxoproline           | 0.9  | 0.50311349 | 0.87 | 0.4685006  | 0.85 | 0.30441025 | 1.08 | 0.7347356  | 1.03 | 0.87253997 | 1.1  | 0.39505706 |
| asp                  | 1.1  | 0.52394535 | 1.17 | 0.40481225 | 1.11 | 0.44390663 | 1.03 | 0.88473577 | 0.95 | 0.84322506 | 1.02 | 0.82271078 |
| octanoate            | 0.91 | 0.55737179 | 0.85 | 0.40481225 | 0.98 | 0.92011798 | 1.11 | 0.58586768 | 1.17 | 0.48673411 | 0.87 | 0.210154   |
| indole3acetate       | 0.92 | 0.57022444 | 0.94 | 0.7565462  | 0.89 | 0.42123835 | 0.88 | 0.54230726 | 0.97 | 0.87253997 | 0.98 | 0.86906543 |
| kynurenine           | 1.1  | 0.57022444 | 1.4  | 0.05874894 | 1.02 | 0.92011798 | 1    | 0.9895794  | 1.05 | 0.87253997 | 0.84 | 0.14404972 |
| hexanoate            | 0.92 | 0.5719347  | 1.08 | 0.72654379 | 0.86 | 0.31631916 | 0.93 | 0.74699525 | 0.98 | 0.87929535 | 1    | 0.98501085 |
| oxoglutarate         | 1.08 | 0.61144602 | 0.87 | 0.44134931 | 1.12 | 0.42123835 | 1.13 | 0.54230726 | 1.08 | 0.73072897 | 1.01 | 0.93446827 |
| fumarate             | 0.93 | 0.65158693 | 0.73 | 0.05272217 | 0.94 | 0.68362928 | 0.98 | 0.88572635 | 1.04 | 0.87253997 | 1.03 | 0.81019025 |
| methylhistidine      | 1.07 | 0.70426923 | 0.85 | 0.41155281 | 0.93 | 0.67572438 | 0.87 | 0.54230726 | 1.35 | 0.14417664 | 0.98 | 0.84564104 |
| betaala              | 0.94 | 0.7109633  | 1    | 0.98980912 | 0.86 | 0.36223795 | 0.88 | 0.58533655 | 1.04 | 0.87253997 | 1.12 | 0.355246   |
| lys                  | 1.06 | 0.7340336  | 1.17 | 0.44134931 | 1.08 | 0.63095466 | 1.06 | 0.79603694 | 0.77 | 0.19479229 | 1.02 | 0.8312358  |
| sarcosine            | 1.06 | 0.74273496 | 1.08 | 0.72654379 | 0.96 | 0.81359652 | 0.89 | 0.58179287 | 0.95 | 0.86478055 | 0.92 | 0.49035048 |
| ab                   | 0.96 | 0.82661083 | 1.01 | 0.98712874 | 0.89 | 0.42271879 | 0.87 | 0.5134017  | 1.03 | 0.87253997 | 1.35 | 0.00713671 |
| arg                  | 0.96 | 0.82661083 | 0.93 | 0.74426822 | 0.81 | 0.16504596 | 0.89 | 0.58533655 | 0.93 | 0.77473483 | 1.13 | 0.28579463 |
| citruiline           | 0.96 | 0.82661083 | 0.75 | 0.07554382 | 0.92 | 0.59454357 | 1.05 | 0.82070676 | 1.23 | 0.31241677 | 1.04 | 0.7113077  |
| nndimethylglycine    | 1.04 | 0.8335904  | 0.99 | 0.97941508 | 0.98 | 0.92011798 | 1.06 | 0.78420522 | 1.21 | 0.40606762 | 0.87 | 0.22040661 |
| azelate              | 1.03 | 0.83878625 | 0.91 | 0.65682679 | 1.03 | 0.89548857 | 1.09 | 0.66866017 | 1.03 | 0.87929535 | 0.97 | 0.76121497 |
| nacetylaspartate     | 0.97 | 0.86413811 | 0.87 | 0.50638276 | 0.99 | 0.93241037 | 1.03 | 0.88473577 | 1.13 | 0.5989992  | 0.89 | 0.2856236  |
| pelargonate          | 1.02 | 0.89756838 | 0.85 | 0.37604171 | 1.06 | 0.68362928 | 1.07 | 0.75592437 | 1.16 | 0.53054962 | 0.94 | 0.57843152 |
| guanidinoacetate     | 1    | 0.99209489 | 0.9  | 0.70944136 | 1.04 | 0.8819145  | 1.03 | 0.88572635 | 1.13 | 0.67313285 | 1.07 | 0.6282324  |
| glutarate            | 1    | 0.99209489 | 0.89 | 0.54092631 | 0.99 | 0.94803337 | 1.13 | 0.54230726 | 1.09 | 0.72990326 | 0.97 | 0.80776319 |
| malate               | 1    | 0.99209489 | 0.96 | 0.88134776 | 0.87 | 0.34263748 | 0.82 | 0.28507795 | 1.32 | 0.14417664 | 1.29 | 0.01722124 |
| indoxylsulfate       | 1    | 0.99209489 | 1.04 | 0.8552303  | 1.04 | 0.84424596 | 1.07 | 0.75237462 | 0.89 | 0.5989992  | 0.92 | 0.45205397 |

\* Indicates metabolite among 25 highest ranked metabolites in original and sensitivity analyses.

Supplementary Table 5a. Sex-stratified logistic regression: BLSA Male Participants Only. Model includes age and sample storage time as covariates.

| Metabolite         | Me<br>tS<br>OR | MetS<br>p-<br>value | MetS<br>FDR<br>p-<br>value | W<br>C<br>O<br>R | WC p-<br>value | WC<br>FDR<br>p-<br>value | Elevat<br>ed<br>TGs<br>OR | Elevat<br>ed<br>TGs<br>p-<br>value | Elevat<br>ed<br>TGs<br>FDR<br>p-<br>value | Redu<br>ced<br>HDL-<br>c OR | Reduc<br>ed<br>HDL-<br>c p-<br>value | Reduc<br>ed<br>HDL-<br>c FDR<br>p-<br>value | B<br>P<br>O<br>R | BP p-<br>value | BP<br>FDR<br>p-<br>value | Elevat<br>ed<br>FG<br>OR | Elevat<br>ed FG<br>p-<br>value | Elevat<br>ed FG<br>FDR<br>p-<br>value |
|--------------------|----------------|---------------------|----------------------------|------------------|----------------|--------------------------|---------------------------|------------------------------------|-------------------------------------------|-----------------------------|--------------------------------------|---------------------------------------------|------------------|----------------|--------------------------|--------------------------|--------------------------------|---------------------------------------|
| alphaaminoadipate* | 2.87           | 0.0005182           | 0.0227631                  | 1.55             | 0.1059652      | 0.4760536                | 2.19                      | 0.0095168                          | 0.1950934                                 | 2.38                        | 0.0027552                            | 0.1498713                                   | 1.85             | 0.030548       | 0.8349797                | 1.79                     | 0.0265599                      | 0.0265599                             |
| glucuronate*       | 3              | 0.0005552           | 0.0227631                  | 1.9              | 0.0251289      | 0.3257099                | 2.37                      | 0.0059687                          | 0.1631448                                 | 1.82                        | 0.0350901                            | 0.2615804                                   | 2.22             | 0.0109745      | 0.8349797                | 2.7                      | 0.0012353                      | 0.0012353                             |
| urate*             | 2.67           | 0.0011812           | 0.0322856                  | 2.09             | 0.0123954      | 0.3257099                | 1.89                      | 0.0312603                          | 0.3010162                                 | 1.31                        | 0.3203896                            | 0.6153199                                   | 1.29             | 0.368971       | 0.9375829                | 2.62                     | 0.0014674                      | 0.0014674                             |
| glu*               | 2.6            | 0.0073975           | 0.1516492                  | 1.97             | 0.0520086      | 0.4738565                | 1.87                      | 0.0829518                          | 0.3607329                                 | 2.84                        | 0.0036554                            | 0.1498713                                   | 1.24             | 0.5526388      | 0.9375829                | 1.69                     | 0.1137052                      | 0.1137052                             |
| uridine*           | 2.07           | 0.0118669           | 0.1946179                  | 1.15             | 0.6025297      | 0.8374141                | 2.7                       | 0.0017576                          | 0.0862167                                 | 2.07                        | 0.0117426                            | 0.1925789                                   | 1.36             | 0.2811878      | 0.9375829                | 1.71                     | 0.0501043                      | 0.0501043                             |
| hydroxybutyrate_2* | 1.81           | 0.0205951           | 0.2814665                  | 1.58             | 0.070924       | 0.4760536                | 1.71                      | 0.0470796                          | 0.3509572                                 | 1.63                        | 0.0548578                            | 0.2646083                                   | 1.35             | 0.2514264      | 0.9375829                | 1.68                     | 0.0342173                      | 0.0342173                             |
| ile*               | 1.99           | 0.024785            | 0.2903381                  | 1.74             | 0.0665591      | 0.4760536                | 1.7                       | 0.1066432                          | 0.3860282                                 | 2.27                        | 0.0088177                            | 0.1807636                                   | 0.92             | 0.7968721      | 0.9375829                | 1.75                     | 0.0512286                      | 0.0512286                             |
| asn*               | 0.58           | 0.0456432           | 0.3742741                  | 0.56             | 0.0317766      | 0.3257099                | 0.91                      | 0.7263914                          | 0.891485                                  | 1.02                        | 0.9427818                            | 0.954421                                    | 0.81             | 0.4224954      | 0.9375829                | 0.73                     | 0.2101272                      | 0.2101272                             |
| phe*               | 1.71           | 0.0446288           | 0.3742741                  | 1.51             | 0.1219586      | 0.4760536                | 1.65                      | 0.0731521                          | 0.3607329                                 | 1.82                        | 0.0256115                            | 0.2183242                                   | 1.09             | 0.7496855      | 0.9375829                | 1.23                     | 0.402108                       | 0.402108                              |
| kynurenine         | 1.76           | 0.037387            | 0.3742741                  | 1.54             | 0.1116768      | 0.4760536                | 1.7                       | 0.0641233                          | 0.3607329                                 | 1.68                        | 0.0500624                            | 0.2646083                                   | 1.78             | 0.0492713      | 0.8980987                | 1.18                     | 0.5044163                      | 0.5044163                             |
| creatine           | 1.65           | 0.0553838           | 0.3832439                  | 1.36             | 0.2322582      | 0.6339386                | 1.68                      | 0.0649265                          | 0.3607329                                 | 1.58                        | 0.0844555                            | 0.3847415                                   | 1.14             | 0.6040098      | 0.9375829                | 1.66                     | 0.0496098                      | 0.0496098                             |
| carnitine*         | 1.67           | 0.0607582           | 0.3832439                  | 1.28             | 0.3588687      | 0.7356809                | 1.86                      | 0.0330384                          | 0.3010162                                 | 1.34                        | 0.2601642                            | 0.6153199                                   | 1.69             | 0.0685817      | 0.8980987                | 1.51                     | 0.114041                       | 0.114041                              |
| cystine*           | 1.68           | 0.0591507           | 0.3832439                  | 1.39             | 0.227749       | 0.6339386                | 2.64                      | 0.0021028                          | 0.0862167                                 | 1.82                        | 0.0266249                            | 0.2183242                                   | 1.56             | 0.1192872      | 0.9155642                | 1.34                     | 0.2553953                      | 0.2553953                             |
| taurine            | 0.62           | 0.0766625           | 0.4490233                  | 0.78             | 0.3506579      | 0.7356809                | 0.8                       | 0.4443516                          | 0.814809                                  | 1.2                         | 0.4924028                            | 0.7673194                                   | 0.85             | 0.5514529      | 0.9375829                | 0.53                     | 0.018379                       | 0.018379                              |



|                           |          |               |               |          |               |               |      |               |               |      |               |               |          |               |               |      |               |               |
|---------------------------|----------|---------------|---------------|----------|---------------|---------------|------|---------------|---------------|------|---------------|---------------|----------|---------------|---------------|------|---------------|---------------|
| pro*                      | 1.4<br>4 | 0.1229<br>039 | 0.4912<br>559 | 1.<br>02 | 0.9248<br>66  | 0.9479<br>877 | 1.55 | 0.0768<br>732 | 0.3607<br>329 | 1.44 | 0.1177<br>798 | 0.4132<br>523 | 1.<br>71 | 0.0304<br>828 | 0.8349<br>797 | 1.62 | 0.0392<br>575 | 0.0392<br>575 |
| val*                      | 1.5<br>7 | 0.1198<br>799 | 0.4912<br>559 | 1.<br>59 | 0.1116<br>104 | 0.4760<br>536 | 1.86 | 0.0533<br>218 | 0.3607<br>329 | 1.84 | 0.0392<br>984 | 0.2646<br>083 | 1.<br>14 | 0.6550<br>685 | 0.9375<br>829 | 1.44 | 0.1858<br>299 | 0.1858<br>299 |
| hydroxybutyrate<br>_3     | 1.5<br>3 | 0.1132<br>676 | 0.4912<br>559 | 1        | 0.9859<br>589 | 0.9859<br>589 | 1.8  | 0.0436<br>825 | 0.3509<br>572 | 1.29 | 0.3332<br>269 | 0.6153<br>199 | 1.<br>27 | 0.3622<br>664 | 0.9375<br>829 | 1.27 | 0.3375<br>159 | 0.3375<br>159 |
| glutarate*                | 0.6      | 0.1186<br>921 | 0.4912<br>559 | 0.<br>85 | 0.5816<br>799 | 0.8368<br>027 | 0.97 | 0.9257<br>279 | 0.9608<br>821 | 0.92 | 0.7979<br>716 | 0.9544<br>21  | 1.<br>11 | 0.7326<br>043 | 0.9375<br>829 | 0.52 | 0.0368<br>224 | 0.0368<br>224 |
| nacetylaspargate          | 0.6<br>6 | 0.1258<br>094 | 0.4912<br>559 | 0.<br>79 | 0.3966<br>181 | 0.7477<br>834 | 0.5  | 0.0280<br>694 | 0.3010<br>162 | 0.46 | 0.0079<br>543 | 0.1807<br>636 | 1.<br>15 | 0.6281<br>431 | 0.9375<br>829 | 0.73 | 0.2242<br>784 | 0.2242<br>784 |
| isocitrate*               | 1.6<br>4 | 0.1218<br>631 | 0.4912<br>559 | 1.<br>16 | 0.6356<br>087 | 0.8517<br>74  | 1.26 | 0.4826<br>937 | 0.8289<br>967 | 1.23 | 0.5046<br>74  | 0.7673<br>194 | 1.<br>92 | 0.0556<br>614 | 0.8980<br>987 | 1.24 | 0.4741<br>177 | 0.4741<br>177 |
| indoxylsulfate            | 1.5<br>3 | 0.1138<br>288 | 0.4912<br>559 | 1.<br>51 | 0.1269<br>946 | 0.4760<br>536 | 1.31 | 0.3396<br>588 | 0.7753<br>657 | 0.99 | 0.9557<br>632 | 0.9557<br>632 | 1.<br>09 | 0.7578<br>329 | 0.9375<br>829 | 1.26 | 0.3543<br>877 | 0.3543<br>877 |
| leu*                      | 1.5<br>4 | 0.1405<br>881 | 0.5127<br>05  | 1.<br>94 | 0.0312<br>418 | 0.3257<br>099 | 1.48 | 0.2236<br>92  | 0.5998<br>54  | 1.99 | 0.0226<br>942 | 0.2183<br>242 | 1.<br>2  | 0.5469<br>251 | 0.9375<br>829 | 1.4  | 0.2189<br>849 | 0.2189<br>849 |
| triethanolamine           | 1.6<br>8 | 0.1438<br>075 | 0.5127<br>05  | 0.<br>94 | 0.8595<br>982 | 0.9398<br>273 | 1.86 | 0.1056<br>434 | 0.3860<br>282 | 2.46 | 0.0195<br>627 | 0.2183<br>242 | 0.<br>88 | 0.7204<br>918 | 0.9375<br>829 | 1.68 | 0.1247<br>015 | 0.1247<br>015 |
| methyl2oxopenta<br>noate* | 1.5<br>5 | 0.1508<br>776 | 0.5154<br>984 | 1.<br>4  | 0.2717<br>263 | 0.6553<br>399 | 1.24 | 0.5054<br>858 | 0.8289<br>967 | 1.33 | 0.3331<br>277 | 0.6153<br>199 | 1.<br>25 | 0.4517<br>378 | 0.9375<br>829 | 2.96 | 0.0009<br>521 | 0.0009<br>521 |
| gln*                      | 0.6<br>5 | 0.1596<br>409 | 0.5236<br>222 | 0.<br>7  | 0.2396<br>597 | 0.6339<br>386 | 0.96 | 0.8919<br>957 | 0.9473<br>496 | 1.03 | 0.9141<br>409 | 0.9544<br>21  | 0.<br>83 | 0.5331<br>16  | 0.9375<br>829 | 0.91 | 0.7284<br>116 | 0.7284<br>116 |
| oxoglutarate              | 1.4<br>1 | 0.1864<br>007 | 0.5878<br>791 | 1.<br>18 | 0.4937<br>006 | 0.8008<br>577 | 1.65 | 0.0883<br>696 | 0.3623<br>153 | 1.7  | 0.0430<br>672 | 0.2646<br>083 | 1.<br>04 | 0.8833<br>677 | 0.9375<br>829 | 1.36 | 0.2082<br>447 | 0.2082<br>447 |
| guanidinoacetate          | 0.7      | 0.2039<br>335 | 0.6193<br>535 | 1.<br>19 | 0.5276<br>761 | 0.8215<br>456 | 0.87 | 0.6419<br>177 | 0.8586<br>636 | 0.92 | 0.7727<br>817 | 0.9544<br>21  | 0.<br>63 | 0.1013<br>534 | 0.9155<br>642 | 1.1  | 0.7200<br>527 | 0.7200<br>527 |
| methylhistidine           | 1.4<br>1 | 0.2185<br>922 | 0.6401<br>628 | 0.<br>79 | 0.4103<br>689 | 0.7477<br>834 | 1.99 | 0.0259<br>33  | 0.3010<br>162 | 1.31 | 0.3270<br>874 | 0.6153<br>199 | 1.<br>11 | 0.7247<br>495 | 0.9375<br>829 | 1.33 | 0.2886<br>845 | 0.2886<br>845 |
| nndimethylglycin<br>e     | 1.3<br>5 | 0.2286<br>206 | 0.6464<br>444 | 1.<br>47 | 0.1321<br>475 | 0.4760<br>536 | 1.23 | 0.4396<br>562 | 0.8148<br>09  | 1.31 | 0.2894<br>43  | 0.6153<br>199 | 1.<br>51 | 0.1339<br>85  | 0.9155<br>642 | 1.14 | 0.6010<br>285 | 0.6010<br>285 |
| oxoisopentanoate          | 1.4      | 0.2587<br>964 | 0.7073<br>769 | 1.<br>7  | 0.0810<br>393 | 0.4760<br>536 | 1.29 | 0.4341<br>091 | 0.8148<br>09  | 0.93 | 0.7968<br>543 | 0.9544<br>21  | 1.<br>35 | 0.3206<br>438 | 0.9375<br>829 | 2.01 | 0.0188<br>879 | 0.0188<br>879 |
| gly                       | 0.7<br>4 | 0.2821<br>344 | 0.7396<br>209 | 0.<br>64 | 0.1169<br>085 | 0.4760<br>536 | 0.7  | 0.2414<br>047 | 0.5998<br>54  | 1.24 | 0.4210<br>67  | 0.7431<br>617 | 0.<br>61 | 0.0876<br>194 | 0.8980<br>987 | 0.78 | 0.3271<br>542 | 0.3271<br>542 |
| prolinebetaine            | 1.2<br>7 | 0.2886<br>326 | 0.7396<br>209 | 1.<br>22 | 0.4012<br>846 | 0.7477<br>834 | 0.86 | 0.4961<br>588 | 0.8289<br>967 | 1.08 | 0.7304<br>986 | 0.9472<br>311 | 1.<br>38 | 0.1856<br>695 | 0.9375<br>829 | 0.93 | 0.7332<br>178 | 0.7332<br>178 |
| betaala                   | 1.2<br>4 | 0.4090<br>278 | 0.8228<br>161 | 1.<br>08 | 0.7632<br>677 | 0.9192<br>225 | 1.41 | 0.2293<br>871 | 0.5998<br>54  | 1.29 | 0.3230<br>881 | 0.6153<br>199 | 0.<br>95 | 0.8537<br>725 | 0.9375<br>829 | 1.06 | 0.8006<br>574 | 0.8006<br>574 |
| ala                       | 1.2<br>2 | 0.4642<br>354 | 0.8228<br>161 | 1.<br>44 | 0.1910<br>81  | 0.5803<br>2   | 1.25 | 0.4471<br>513 | 0.8148<br>09  | 1.3  | 0.3292<br>363 | 0.6153<br>199 | 0.<br>82 | 0.4830<br>913 | 0.9375<br>829 | 1.52 | 0.1151<br>118 | 0.1151<br>118 |
| creatinine                | 1.2<br>8 | 0.3339<br>221 | 0.8228<br>161 | 0.<br>95 | 0.8336<br>079 | 0.9363<br>815 | 1.2  | 0.4950<br>381 | 0.8289<br>967 | 0.98 | 0.9404<br>505 | 0.9544<br>21  | 1.<br>19 | 0.5150<br>605 | 0.9375<br>829 | 0.95 | 0.8492<br>586 | 0.8492<br>586 |

|                      |          |               |               |          |               |               |      |               |               |      |               |               |          |               |               |      |               |               |
|----------------------|----------|---------------|---------------|----------|---------------|---------------|------|---------------|---------------|------|---------------|---------------|----------|---------------|---------------|------|---------------|---------------|
| ornithine            | 1.1<br>6 | 0.5418<br>545 | 0.8228<br>161 | 1.<br>03 | 0.9126<br>25  | 0.9479<br>877 | 0.99 | 0.9788<br>079 | 0.9991<br>888 | 1.34 | 0.2295<br>963 | 0.6153<br>199 | 1.<br>15 | 0.5871<br>348 | 0.9375<br>829 | 1.26 | 0.3310<br>589 | 0.3310<br>589 |
| asp                  | 1.1<br>7 | 0.5368<br>995 | 0.8228<br>161 | 1.<br>46 | 0.1460<br>983 | 0.4991<br>693 | 1    | 0.9927<br>543 | 0.9991<br>888 | 1.32 | 0.2741<br>987 | 0.6153<br>199 | 0.<br>97 | 0.9208<br>958 | 0.9558<br>665 | 0.79 | 0.3254<br>519 | 0.3254<br>519 |
| methylnicotinamide   | 1.1<br>9 | 0.4770<br>784 | 0.8228<br>161 | 0.<br>78 | 0.3383<br>392 | 0.7301<br>003 | 1.8  | 0.0309<br>74  | 0.3010<br>162 | 1.47 | 0.1194<br>996 | 0.4132<br>523 | 0.<br>95 | 0.8423<br>023 | 0.9375<br>829 | 0.85 | 0.5112<br>785 | 0.5112<br>785 |
| citrulline           | 1.2<br>4 | 0.5139<br>32  | 0.8228<br>161 | 0.<br>86 | 0.6335<br>817 | 0.8517<br>74  | 1.4  | 0.3404<br>044 | 0.7753<br>657 | 1.07 | 0.8445<br>931 | 0.9544<br>21  | 0.<br>78 | 0.4611<br>423 | 0.9375<br>829 | 1.1  | 0.7494<br>456 | 0.7494<br>456 |
| tyr                  | 1.2<br>7 | 0.3783<br>846 | 0.8228<br>161 | 1.<br>53 | 0.1335<br>272 | 0.4760<br>536 | 1.67 | 0.0835<br>845 | 0.3607<br>329 | 1.32 | 0.3019<br>701 | 0.6153<br>199 | 1.<br>36 | 0.2781<br>785 | 0.9375<br>829 | 1.44 | 0.1681<br>91  | 0.1681<br>91  |
| trp                  | 1.3<br>1 | 0.3533<br>616 | 0.8228<br>161 | 1.<br>03 | 0.9214<br>83  | 0.9479<br>877 | 1.19 | 0.5699<br>894 | 0.8407<br>384 | 2.05 | 0.0188<br>156 | 0.2183<br>242 | 1.<br>07 | 0.8100<br>994 | 0.9375<br>829 | 1.62 | 0.1000<br>741 | 0.1000<br>741 |
| pyruvate             | 1.1<br>6 | 0.5188<br>455 | 0.8228<br>161 | 1.<br>22 | 0.3973<br>49  | 0.7477<br>834 | 1.22 | 0.4212<br>423 | 0.8148<br>09  | 0.97 | 0.9055<br>742 | 0.9544<br>21  | 0.<br>91 | 0.6921<br>398 | 0.9375<br>829 | 1.48 | 0.0854<br>348 | 0.0854<br>348 |
| lactate              | 1.2      | 0.5229<br>569 | 0.8228<br>161 | 2.<br>16 | 0.0126<br>766 | 0.3257<br>099 | 1.19 | 0.5650<br>191 | 0.8407<br>384 | 1.33 | 0.3077<br>528 | 0.6153<br>199 | 1.<br>12 | 0.7141<br>074 | 0.9375<br>829 | 1.37 | 0.2513<br>152 | 0.2513<br>152 |
| hexanoate            | 0.8<br>5 | 0.4821<br>674 | 0.8228<br>161 | 1.<br>06 | 0.8024<br>167 | 0.9267<br>348 | 0.65 | 0.1082<br>762 | 0.3860<br>282 | 0.62 | 0.0502<br>801 | 0.2646<br>083 | 1.<br>06 | 0.8143<br>592 | 0.9375<br>829 | 1.09 | 0.6879<br>549 | 0.6879<br>549 |
| oxoproline           | 0.8<br>6 | 0.5417<br>506 | 0.8228<br>161 | 0.<br>71 | 0.1671<br>655 | 0.5483<br>029 | 0.63 | 0.0795<br>741 | 0.3607<br>329 | 0.87 | 0.5763<br>935 | 0.8074<br>547 | 0.<br>94 | 0.8061<br>574 | 0.9375<br>829 | 1.23 | 0.3883<br>684 | 0.3883<br>684 |
| malate               | 1.2<br>1 | 0.4873<br>991 | 0.8228<br>161 | 1.<br>25 | 0.4333<br>31  | 0.7702<br>891 | 0.9  | 0.7284<br>085 | 0.8914<br>85  | 1.19 | 0.5240<br>23  | 0.7673<br>194 | 1.<br>41 | 0.2521<br>241 | 0.9375<br>829 | 1.41 | 0.2011<br>92  | 0.2011<br>92  |
| threonate            | 1.2      | 0.4829<br>078 | 0.8228<br>161 | 1.<br>21 | 0.4690<br>252 | 0.7889<br>96  | 1.39 | 0.2377<br>174 | 0.5998<br>54  | 1.47 | 0.1378<br>59  | 0.4521<br>776 | 1.<br>04 | 0.8787<br>982 | 0.9375<br>829 | 1.01 | 0.9746<br>12  | 0.9746<br>12  |
| octanoate            | 0.7<br>9 | 0.3938<br>16  | 0.8228<br>161 | 0.<br>61 | 0.0812<br>975 | 0.4760<br>536 | 0.92 | 0.7845<br>394 | 0.9099<br>239 | 0.73 | 0.2718<br>476 | 0.6153<br>199 | 0.<br>71 | 0.2430<br>755 | 0.9375<br>829 | 0.87 | 0.6053<br>152 | 0.6053<br>152 |
| pelargonate          | 0.7<br>9 | 0.4634<br>209 | 0.8228<br>161 | 1.<br>02 | 0.9575<br>235 | 0.9693<br>448 | 1.36 | 0.3835<br>055 | 0.8148<br>09  | 0.81 | 0.5183<br>024 | 0.7673<br>194 | 0.<br>55 | 0.0870<br>738 | 0.8980<br>987 | 1.39 | 0.2975<br>204 | 0.2975<br>204 |
| glycerophosphate     | 0.7<br>7 | 0.4960<br>053 | 0.8228<br>161 | 0.<br>39 | 0.0224<br>679 | 0.3257<br>099 | 0.57 | 0.1652<br>972 | 0.5462<br>392 | 1.03 | 0.9361<br>158 | 0.9544<br>21  | 1.<br>31 | 0.4901<br>569 | 0.9375<br>829 | 0.94 | 0.8544<br>168 | 0.8544<br>168 |
| cisaconitate         | 1.2<br>3 | 0.4051<br>703 | 0.8228<br>161 | 1.<br>39 | 0.2027<br>339 | 0.5937<br>208 | 0.95 | 0.8543<br>671 | 0.9379<br>77  | 0.78 | 0.3237<br>956 | 0.6153<br>199 | 1.<br>22 | 0.4546<br>615 | 0.9375<br>829 | 1.68 | 0.0424<br>189 | 0.0424<br>189 |
| hippurate            | 0.8<br>4 | 0.5151<br>715 | 0.8228<br>161 | 1.<br>03 | 0.9011<br>795 | 0.9479<br>877 | 1.09 | 0.7629<br>39  | 0.9066<br>811 | 0.65 | 0.1209<br>519 | 0.4132<br>523 | 1.<br>22 | 0.4814<br>917 | 0.9375<br>829 | 0.99 | 0.9653<br>035 | 0.9653<br>035 |
| azelate              | 3.2<br>3 | 0.4451<br>099 | 0.8228<br>161 | 0.<br>65 | 0.7847<br>022 | 0.9192<br>225 | 6.96 | 0.2341<br>393 | 0.5998<br>54  | 2.04 | 0.6464<br>677 | 0.8550<br>056 | 0.<br>99 | 0.9961<br>55  | 0.9961<br>55  | 9.19 | 0.1451<br>891 | 0.1451<br>891 |
| citrate              | 0.8<br>3 | 0.4654<br>322 | 0.8228<br>161 | 0.<br>76 | 0.2884<br>7   | 0.6641<br>092 | 0.79 | 0.3933<br>307 | 0.8148<br>09  | 0.78 | 0.3376<br>756 | 0.6153<br>199 | 0.<br>96 | 0.8654<br>206 | 0.9375<br>829 | 0.82 | 0.4348<br>631 | 0.4348<br>631 |
| trimethylaminenoxide | 0.8<br>7 | 0.5797<br>14  | 0.8643<br>009 | 0.<br>87 | 0.5730<br>551 | 0.8368<br>027 | 0.92 | 0.7543<br>657 | 0.9066<br>811 | 1.15 | 0.5652<br>952 | 0.8074<br>547 | 1.<br>01 | 0.9752<br>216 | 0.9872<br>613 | 1.11 | 0.6586<br>467 | 0.6586<br>467 |
| muicate              | 1.1<br>5 | 0.5944<br>694 | 0.8704<br>73  | 1.<br>12 | 0.6647<br>992 | 0.8517<br>74  | 1.47 | 0.1794<br>46  | 0.5656<br>627 | 1.54 | 0.0977<br>513 | 0.4132<br>523 | 1.<br>22 | 0.4597<br>259 | 0.9375<br>829 | 0.7  | 0.1572<br>11  | 0.1572<br>11  |

|                              |            |               |               |          |               |               |      |               |               |      |               |               |          |               |               |      |               |               |
|------------------------------|------------|---------------|---------------|----------|---------------|---------------|------|---------------|---------------|------|---------------|---------------|----------|---------------|---------------|------|---------------|---------------|
| aminoisobutyrate             | 1.1<br>2   | 0.6255<br>769 | 0.8792<br>114 | 1.<br>06 | 0.8141<br>59  | 0.9272<br>367 | 1.07 | 0.7878<br>609 | 0.9099<br>239 | 1.28 | 0.3047<br>796 | 0.6153<br>199 | 1.<br>19 | 0.4831<br>851 | 0.9375<br>829 | 0.72 | 0.1713<br>997 | 0.1713<br>997 |
| pipecolate                   | 0.8<br>8   | 0.6244<br>406 | 0.8792<br>114 | 0.<br>73 | 0.2606<br>118 | 0.6475<br>808 | 1    | 0.9991<br>888 | 0.9991<br>888 | 1.05 | 0.8505<br>069 | 0.9544<br>21  | 1.<br>44 | 0.2071<br>498 | 0.9375<br>829 | 1.15 | 0.5990<br>525 | 0.5990<br>525 |
| hydroxyproline               | 1.1<br>4   | 0.6326<br>034 | 0.8792<br>114 | 1.<br>04 | 0.8986<br>496 | 0.9479<br>877 | 1.05 | 0.8693<br>446 | 0.9379<br>77  | 0.81 | 0.4415<br>304 | 0.7431<br>617 | 1.<br>49 | 0.1711<br>072 | 0.9375<br>829 | 1.55 | 0.1144<br>173 | 0.1144<br>173 |
| ab                           | 1.1<br>3   | 0.6465<br>546 | 0.8836<br>246 | 0.<br>81 | 0.4415<br>072 | 0.7702<br>891 | 1.39 | 0.2537<br>842 | 0.6120<br>677 | 1.55 | 0.1178<br>827 | 0.4132<br>523 | 1.<br>09 | 0.7590<br>605 | 0.9375<br>829 | 1.38 | 0.2260<br>693 | 0.2260<br>693 |
| sarcosine                    | 1.1<br>1   | 0.6719<br>988 | 0.8940<br>828 | 0.<br>93 | 0.7585<br>847 | 0.9192<br>225 | 1.12 | 0.6701<br>765 | 0.8586<br>636 | 0.98 | 0.9206<br>081 | 0.9544<br>21  | 1.<br>23 | 0.4091<br>087 | 0.9375<br>829 | 1.45 | 0.1258<br>337 | 0.1258<br>337 |
| thr                          | 0.9<br>1   | 0.6978<br>208 | 0.8940<br>828 | 0.<br>85 | 0.4980<br>944 | 0.8008<br>577 | 0.9  | 0.6646<br>337 | 0.8586<br>636 | 1.04 | 0.8537<br>262 | 0.9544<br>21  | 1.<br>39 | 0.1812<br>253 | 0.9375<br>829 | 1.04 | 0.8534<br>265 | 0.8534<br>265 |
| gammabutyrobeta<br>aine      | 0.9<br>1   | 0.6907<br>59  | 0.8940<br>828 | 0.<br>72 | 0.1881<br>435 | 0.5803<br>2   | 1.14 | 0.6263<br>34  | 0.8586<br>636 | 0.87 | 0.5920<br>217 | 0.8090<br>963 | 0.<br>78 | 0.3307<br>597 | 0.9375<br>829 | 0.85 | 0.4752<br>942 | 0.4752<br>942 |
| his                          | 1.1<br>1   | 0.6810<br>817 | 0.8940<br>828 | 0.<br>89 | 0.6464<br>412 | 0.8517<br>74  | 1.42 | 0.1865<br>02  | 0.5656<br>627 | 1.35 | 0.2263<br>196 | 0.6153<br>199 | 1.<br>49 | 0.1277<br>016 | 0.9155<br>642 | 1.26 | 0.3416<br>56  | 0.3416<br>56  |
| adma                         | 1.1<br>1   | 0.7172<br>188 | 0.9047<br>99  | 1.<br>19 | 0.5594<br>151 | 0.8340<br>37  | 1.28 | 0.4291<br>27  | 0.8148<br>09  | 1.35 | 0.3094<br>191 | 0.6153<br>199 | 1.<br>34 | 0.3396<br>116 | 0.9375<br>829 | 0.76 | 0.3425<br>901 | 0.3425<br>901 |
| choline                      | 0.8<br>8   | 0.7584<br>937 | 0.9073<br>942 | 1.<br>24 | 0.5981<br>073 | 0.8374<br>141 | 0.56 | 0.1931<br>531 | 0.5656<br>627 | 0.77 | 0.5215<br>178 | 0.7673<br>194 | 1.<br>31 | 0.5211<br>217 | 0.9375<br>829 | 0.91 | 0.8034<br>006 | 0.8034<br>006 |
| betaine                      | 0.9<br>5   | 0.8335<br>277 | 0.9073<br>942 | 0.<br>56 | 0.0212<br>383 | 0.3257<br>099 | 1.42 | 0.1665<br>363 | 0.5462<br>392 | 1.14 | 0.5809<br>735 | 0.8074<br>547 | 1.<br>04 | 0.8812<br>846 | 0.9375<br>829 | 0.72 | 0.1679<br>463 | 0.1679<br>463 |
| lys                          | 1.0<br>5   | 0.8409<br>995 | 0.9073<br>942 | 0.<br>93 | 0.7786<br>979 | 0.9192<br>225 | 1.1  | 0.7238<br>965 | 0.8914<br>85  | 1.5  | 0.1040<br>85  | 0.4132<br>523 | 1.<br>01 | 0.9553<br>785 | 0.9792<br>629 | 0.94 | 0.7801<br>326 | 0.7801<br>326 |
| met                          | 1.1<br>909 | 0.7597<br>909 | 0.9073<br>942 | 0.<br>87 | 0.6559<br>625 | 0.8517<br>74  | 1.06 | 0.8672<br>591 | 0.9379<br>77  | 1.43 | 0.2471<br>683 | 0.6153<br>199 | 0.<br>94 | 0.8497<br>855 | 0.9375<br>829 | 0.83 | 0.5455<br>463 | 0.5455<br>463 |
| guanidinosuccina<br>te       | 1.0<br>6   | 0.8192<br>334 | 0.9073<br>942 | 0.<br>75 | 0.2915<br>602 | 0.6641<br>092 | 0.85 | 0.5780<br>186 | 0.8407<br>384 | 0.58 | 0.0524<br>718 | 0.2646<br>083 | 0.<br>88 | 0.6445<br>951 | 0.9375<br>829 | 0.86 | 0.5794<br>603 | 0.5794<br>603 |
| indole3acetate               | 1.0<br>7   | 0.7983<br>17  | 0.9073<br>942 | 2.<br>01 | 0.0130<br>254 | 0.3257<br>099 | 1.17 | 0.5844<br>157 | 0.8407<br>384 | 0.81 | 0.4302<br>314 | 0.7431<br>617 | 1.<br>06 | 0.8383<br>552 | 0.9375<br>829 | 1.34 | 0.2546<br>144 | 0.2546<br>144 |
| oacetyl carnitine            | 1.1<br>107 | 0.8093<br>107 | 0.9073<br>942 | 0.<br>65 | 0.2587<br>136 | 0.6475<br>808 | 0.83 | 0.6658<br>729 | 0.8586<br>636 | 1.09 | 0.8141<br>651 | 0.9544<br>21  | 1.<br>06 | 0.8918<br>471 | 0.9375<br>829 | 1.18 | 0.6570<br>759 | 0.6570<br>759 |
| glycerophosphor<br>ylcholine | 1.0<br>7   | 0.7839<br>469 | 0.9073<br>942 | 0.<br>86 | 0.5309<br>99  | 0.8215<br>456 | 1.21 | 0.4614<br>617 | 0.8226<br>056 | 1.02 | 0.9322<br>526 | 0.9544<br>21  | 0.<br>8  | 0.3728<br>85  | 0.9375<br>829 | 1.15 | 0.5284<br>825 | 0.5284<br>825 |
| fumarate                     | 0.9<br>4   | 0.8312<br>402 | 0.9073<br>942 | 1.<br>23 | 0.4714<br>732 | 0.7889<br>96  | 0.84 | 0.5653<br>681 | 0.8407<br>384 | 1.1  | 0.7393<br>023 | 0.9472<br>311 | 0.<br>88 | 0.6608<br>809 | 0.9375<br>829 | 0.92 | 0.7621<br>542 | 0.7621<br>542 |
| acetylbutyrate               | 1.0<br>5   | 0.8255<br>825 | 0.9073<br>942 | 1.<br>04 | 0.8572<br>891 | 0.9398<br>273 | 1.15 | 0.5673<br>844 | 0.8407<br>384 | 0.94 | 0.7784<br>98  | 0.9544<br>21  | 1.<br>06 | 0.8186<br>699 | 0.9375<br>829 | 0.97 | 0.8740<br>578 | 0.8740<br>578 |
| cysteine sulfate             | 1.1<br>5   | 0.8209<br>422 | 0.9073<br>942 | 1.<br>2  | 0.7598<br>854 | 0.9192<br>225 | 1.15 | 0.8310<br>956 | 0.9335<br>595 | 1.52 | 0.4794<br>605 | 0.7673<br>194 | 0.<br>73 | 0.6532<br>325 | 0.9375<br>829 | 0.87 | 0.8085<br>203 | 0.8085<br>203 |
| sdma                         | 0.9<br>6   | 0.8839<br>254 | 0.9413<br>231 | 0.<br>79 | 0.3850<br>45  | 0.7477<br>834 | 1.24 | 0.4383<br>009 | 0.8148<br>09  | 1.22 | 0.4531<br>474 | 0.7431<br>617 | 1.<br>08 | 0.7935<br>201 | 0.9375<br>829 | 0.71 | 0.1901<br>234 | 0.1901<br>234 |

|               |          |               |               |          |               |               |      |               |               |      |               |               |          |               |               |      |               |               |
|---------------|----------|---------------|---------------|----------|---------------|---------------|------|---------------|---------------|------|---------------|---------------|----------|---------------|---------------|------|---------------|---------------|
| ser           | 1.0<br>3 | 0.9062<br>694 | 0.9527<br>447 | 0.<br>91 | 0.7426<br>905 | 0.9192<br>225 | 0.94 | 0.8286<br>215 | 0.9335<br>595 | 1.41 | 0.2132<br>744 | 0.6153<br>199 | 0.<br>9  | 0.6940<br>241 | 0.9375<br>829 | 0.83 | 0.4700<br>148 | 0.4700<br>148 |
| arg           | 1.0<br>3 | 0.9287<br>117 | 0.9639<br>793 | 1.<br>67 | 0.1263<br>436 | 0.4760<br>536 | 0.81 | 0.5334<br>925 | 0.8407<br>384 | 0.79 | 0.4528<br>945 | 0.7431<br>617 | 0.<br>86 | 0.6457<br>718 | 0.9375<br>829 | 1.84 | 0.0551<br>004 | 0.0551<br>004 |
| succinate     | 1        | 0.9867<br>073 | 0.9870<br>297 | 1.<br>63 | 0.0831<br>024 | 0.4760<br>536 | 1.04 | 0.9011<br>374 | 0.9473<br>496 | 0.97 | 0.8951<br>163 | 0.9544<br>21  | 1.<br>08 | 0.7793<br>989 | 0.9375<br>829 | 0.99 | 0.9643<br>986 | 0.9643<br>986 |
| terephthalate | 1        | 0.9870<br>297 | 0.9870<br>297 | 1.<br>14 | 0.5505<br>53  | 0.8340<br>37  | 0.89 | 0.6204<br>191 | 0.8586<br>636 | 1.11 | 0.6253<br>677 | 0.8406<br>583 | 0.<br>81 | 0.3579<br>771 | 0.9375<br>829 | 1.18 | 0.4192<br>675 | 0.4192<br>675 |
| decanoate     | 1.0<br>1 | 0.9674<br>5   | 0.9870<br>297 | 0.<br>76 | 0.3154<br>817 | 0.6991<br>757 | 1.13 | 0.6600<br>199 | 0.8586<br>636 | 0.96 | 0.8830<br>534 | 0.9544<br>21  | 0.<br>87 | 0.5965<br>07  | 0.9375<br>829 | 1.12 | 0.6623<br>014 | 0.6623<br>014 |

\* Indicates metabolite among top 25 highest ranked metabolites in original and sex-stratified models.

Supplementary Table 5b. Sex-stratified logistic regression: BLSA Female Participants Only. Model includes age and sample storage time as covariates.

| Metabolite                | Me<br>tS<br>OR | MetS<br>p-<br>value | MetS<br>FDR<br>p-<br>value | W<br>C<br>O<br>R | WC p-<br>value | WC<br>FDR<br>p-<br>value | Eleva<br>ted<br>TGs<br>OR | Elevat<br>ed<br>TGs<br>p-<br>value | Elevat<br>ed<br>TGs<br>FDR<br>p-<br>value | Redu<br>ced<br>HDL-<br>c OR | Reduc<br>ed<br>HDL-<br>c p-<br>value | Reduc<br>ed<br>HDL-<br>c FDR<br>p-<br>value | B<br>P<br>O<br>R | BP p-<br>value | BP<br>FDR<br>p-<br>value | Eleva<br>ted<br>FG<br>OR | Elevat<br>ed FG<br>p-<br>value | Elevat<br>ed FG<br>FDR<br>p-<br>value |
|---------------------------|----------------|---------------------|----------------------------|------------------|----------------|--------------------------|---------------------------|------------------------------------|-------------------------------------------|-----------------------------|--------------------------------------|---------------------------------------------|------------------|----------------|--------------------------|--------------------------|--------------------------------|---------------------------------------|
| oxoglutarate*             | 3.5<br>4       | 0.0002<br>729       | 0.0223<br>807              | 3.<br>33         | 0.0004<br>488  | 0.0099<br>357            | 2.37                      | 0.0081<br>423                      | 0.2484<br>786                             | 1.91                        | 0.0280<br>82                         | 0.5888<br>033                               | 1.<br>29         | 0.3768<br>372  | 0.9394<br>137            | 1.84                     | 0.0559<br>38                   | 0.0559<br>38                          |
| urate*                    | 3.2<br>4       | 0.0008<br>552       | 0.0350<br>612              | 4.<br>64         | 8.59e-<br>05   | 0.0070<br>457            | 2.09                      | 0.0237<br>426                      | 0.2506<br>09                              | 1.9                         | 0.0396<br>526                        | 0.5888<br>033                               | 1.<br>64         | 0.1277<br>726  | 0.9394<br>137            | 2.22                     | 0.0269<br>403                  | 0.0269<br>403                         |
| alphaaminoadipa<br>te*    | 2.4<br>6       | 0.0020<br>493       | 0.0353<br>913              | 3                | 0.0004<br>847  | 0.0099<br>357            | 1.67                      | 0.0638<br>724                      | 0.3741<br>1                               | 1.19                        | 0.4853<br>944                        | 0.8428<br>31                                | 1.<br>36         | 0.2549<br>922  | 0.9394<br>137            | 2.22                     | 0.0110<br>715                  | 0.0110<br>715                         |
| phe*                      | 2.4<br>3       | 0.0021<br>58        | 0.0353<br>913              | 1.<br>7          | 0.0466<br>983  | 0.2127<br>369            | 2.13                      | 0.0090<br>907                      | 0.2484<br>786                             | 1.55                        | 0.0899<br>467                        | 0.5888<br>033                               | 1.<br>23         | 0.4334<br>733  | 0.9394<br>137            | 1.07                     | 0.8081<br>893                  | 0.8081<br>893                         |
| oxoisopentanoate<br>*     | 2.7<br>3       | 0.0019<br>132       | 0.0353<br>913              | 2.<br>16         | 0.0150<br>823  | 0.0951<br>346            | 2.81                      | 0.0016<br>489                      | 0.1352<br>111                             | 2.15                        | 0.0112<br>368                        | 0.5888<br>033                               | 2                | 0.0261<br>882  | 0.9394<br>137            | 1.56                     | 0.1708<br>617                  | 0.1708<br>617                         |
| leu*                      | 2.3<br>8       | 0.0046<br>124       | 0.0508<br>663              | 1.<br>85         | 0.0383<br>76   | 0.1851<br>08             | 1.8                       | 0.0464<br>952                      | 0.3493<br>174                             | 1.64                        | 0.0760<br>904                        | 0.5888<br>033                               | 1.<br>2          | 0.5253<br>069  | 0.9394<br>137            | 1.67                     | 0.1062<br>129                  | 0.1062<br>129                         |
| tyr*                      | 2.1            | 0.0061<br>158       | 0.0508<br>663              | 2.<br>26         | 0.0041<br>215  | 0.0559<br>184            | 1.85                      | 0.0208<br>433                      | 0.2506<br>09                              | 1.36                        | 0.2127<br>201                        | 0.6840<br>215                               | 1.<br>16         | 0.5629<br>594  | 0.9394<br>137            | 1.4                      | 0.2308<br>458                  | 0.2308<br>458                         |
| cystine*                  | 2.5<br>7       | 0.0043<br>142       | 0.0508<br>663              | 2.<br>63         | 0.0057<br>363  | 0.0583<br>231            | 1.48                      | 0.1748<br>368                      | 0.5749<br>453                             | 1.72                        | 0.0531<br>355                        | 0.5888<br>033                               | 1.<br>42         | 0.2245<br>503  | 0.9394<br>137            | 1.03                     | 0.9151<br>056                  | 0.9151<br>056                         |
| hydroxybutyrate<br>_2*    | 2.3            | 0.0062<br>032       | 0.0508<br>663              | 2.<br>29         | 0.0079<br>502  | 0.0592<br>652            | 1.44                      | 0.2004<br>766                      | 0.6322<br>723                             | 1.41                        | 0.2108<br>984                        | 0.6840<br>215                               | 1.<br>69         | 0.0747<br>568  | 0.9394<br>137            | 2.75                     | 0.0034<br>275                  | 0.0034<br>275                         |
| methyl2oxopenta<br>noate* | 2.2<br>1       | 0.0058<br>548       | 0.0508<br>663              | 2.<br>31         | 0.0047<br>735  | 0.0559<br>184            | 1.89                      | 0.0217<br>293                      | 0.2506<br>09                              | 1.45                        | 0.1533<br>711                        | 0.6773<br>984                               | 1.<br>32         | 0.3176<br>296  | 0.9394<br>137            | 1.64                     | 0.0981<br>005                  | 0.0981<br>005                         |

|                       |          |               |               |          |               |               |      |               |               |      |               |               |          |               |               |      |               |               |
|-----------------------|----------|---------------|---------------|----------|---------------|---------------|------|---------------|---------------|------|---------------|---------------|----------|---------------|---------------|------|---------------|---------------|
| gln*                  | 0.4<br>3 | 0.0105<br>035 | 0.0724<br>815 | 0.<br>53 | 0.0552<br>57  | 0.2384<br>774 | 0.62 | 0.1343<br>849 | 0.4975<br>073 | 0.7  | 0.2416<br>164 | 0.6840<br>215 | 0.<br>6  | 0.1097<br>841 | 0.9394<br>137 | 0.63 | 0.1923<br>096 | 0.1923<br>096 |
| pyruvate*             | 2.0<br>2 | 0.0106<br>07  | 0.0724<br>815 | 2.<br>17 | 0.0064<br>013 | 0.0583<br>231 | 1.87 | 0.0244<br>497 | 0.2506<br>09  | 1.65 | 0.0568<br>171 | 0.5888<br>033 | 1.<br>29 | 0.3440<br>203 | 0.9394<br>137 | 1.22 | 0.4881<br>74  | 0.4881<br>74  |
| pro*                  | 1.9<br>1 | 0.0115<br>193 | 0.0726<br>602 | 2.<br>03 | 0.0076<br>863 | 0.0592<br>652 | 1.52 | 0.0977<br>41  | 0.4975<br>073 | 1.42 | 0.1439<br>057 | 0.6773<br>984 | 1.<br>44 | 0.1555<br>544 | 0.9394<br>137 | 1.61 | 0.0833<br>127 | 0.0833<br>127 |
| ala*                  | 2.1<br>8 | 0.0161<br>318 | 0.0837<br>953 | 2.<br>46 | 0.0091<br>993 | 0.0628<br>62  | 1.46 | 0.2158<br>186 | 0.6467<br>106 | 1.24 | 0.4404<br>246 | 0.8428<br>31  | 1.<br>26 | 0.4434<br>433 | 0.9394<br>137 | 1.99 | 0.0574<br>121 | 0.0574<br>121 |
| guanidinoacetate<br>* | 0.4<br>9 | 0.0146<br>646 | 0.0837<br>953 | 0.<br>61 | 0.0864<br>342 | 0.3316<br>198 | 0.54 | 0.0303<br>077 | 0.2761<br>368 | 0.61 | 0.0713<br>472 | 0.5888<br>033 | 0.<br>78 | 0.3623<br>157 | 0.9394<br>137 | 1.11 | 0.7207<br>337 | 0.7207<br>337 |
| lactate*              | 2.1<br>5 | 0.0163<br>503 | 0.0837<br>953 | 4.<br>38 | 0.0001<br>78  | 0.0072<br>986 | 1.44 | 0.2264<br>617 | 0.6467<br>106 | 2.01 | 0.0239<br>499 | 0.5888<br>033 | 1<br>118 | 0.9896<br>118 | 0.9995<br>988 | 2.08 | 0.0382<br>615 | 0.0382<br>615 |
| betaala               | 2.1<br>3 | 0.0209<br>731 | 0.1011<br>644 | 1.<br>37 | 0.3175<br>994 | 0.6677<br>731 | 1.63 | 0.1322<br>102 | 0.4975<br>073 | 1.52 | 0.1744<br>905 | 0.6840<br>215 | 1.<br>1  | 0.7628<br>113 | 0.9394<br>137 | 1.43 | 0.2931<br>747 | 0.2931<br>747 |
| ile*                  | 2<br>518 | 0.0292<br>518 | 0.1332<br>58  | 2.<br>08 | 0.0253<br>736 | 0.1387<br>09  | 1.32 | 0.3808<br>372 | 0.7435<br>394 | 1.07 | 0.8234<br>556 | 0.8878<br>78  | 0.<br>91 | 0.7660<br>543 | 0.9394<br>137 | 1.7  | 0.1128<br>373 | 0.1128<br>373 |
| carnitine*            | 1.9<br>1 | 0.0311<br>244 | 0.1343<br>265 | 1.<br>21 | 0.5075<br>064 | 0.7532<br>822 | 1.7  | 0.0734<br>661 | 0.4016<br>148 | 1.42 | 0.2205<br>798 | 0.6840<br>215 | 1.<br>49 | 0.1845<br>906 | 0.9394<br>137 | 1.58 | 0.1519<br>636 | 0.1519<br>636 |
| asp                   | 1.6<br>8 | 0.0367<br>648 | 0.1507<br>357 | 1.<br>46 | 0.1250<br>673 | 0.3971<br>274 | 1.46 | 0.1209<br>971 | 0.4975<br>073 | 1.48 | 0.0933<br>469 | 0.5888<br>033 | 0.<br>95 | 0.8190<br>578 | 0.9394<br>137 | 1.32 | 0.2901<br>131 | 0.2901<br>131 |
| isocitrate*           | 1.7<br>8 | 0.0406<br>16  | 0.1585<br>957 | 1.<br>55 | 0.1259<br>185 | 0.3971<br>274 | 1.21 | 0.4922<br>732 | 0.7867<br>849 | 0.84 | 0.5183<br>682 | 0.8428<br>31  | 1.<br>75 | 0.0529<br>976 | 0.9394<br>137 | 1.04 | 0.9016<br>98  | 0.9016<br>98  |
| glu*                  | 1.7<br>8 | 0.0444<br>167 | 0.1655<br>531 | 2.<br>61 | 0.0032<br>697 | 0.0536<br>237 | 1.37 | 0.2448<br>432 | 0.6467<br>106 | 1.36 | 0.2487<br>31  | 0.6840<br>215 | 1.<br>07 | 0.8007<br>107 | 0.9394<br>137 | 1.58 | 0.1328<br>036 | 0.1328<br>036 |
| gly*                  | 0.5<br>8 | 0.0531<br>78  | 0.1895<br>499 | 0.<br>67 | 0.1555<br>139 | 0.4250<br>714 | 0.65 | 0.1200<br>684 | 0.4975<br>073 | 0.86 | 0.5553<br>423 | 0.8428<br>31  | 0.<br>77 | 0.3535<br>432 | 0.9394<br>137 | 1.38 | 0.2927<br>337 | 0.2927<br>337 |
| val*                  | 1.8<br>5 | 0.0554<br>78  | 0.1895<br>499 | 1.<br>75 | 0.0889<br>712 | 0.3316<br>198 | 1.66 | 0.1119<br>302 | 0.4975<br>073 | 1.32 | 0.3615<br>654 | 0.8428<br>31  | 1.<br>14 | 0.6920<br>742 | 0.9394<br>137 | 1.89 | 0.0735<br>149 | 0.0735<br>149 |
| asn*                  | 0.6<br>1 | 0.0593<br>199 | 0.1945<br>691 | 0.<br>55 | 0.0286<br>302 | 0.1467<br>296 | 0.75 | 0.2634<br>459 | 0.6467<br>106 | 0.72 | 0.1996<br>096 | 0.6840<br>215 | 0.<br>76 | 0.3150<br>693 | 0.9394<br>137 | 1.09 | 0.7395<br>033 | 0.7395<br>033 |
| glucuronate           | 1.5<br>4 | 0.0623<br>359 | 0.1965<br>977 | 1.<br>17 | 0.5047<br>582 | 0.7532<br>822 | 1.41 | 0.1395<br>447 | 0.4975<br>073 | 1.09 | 0.6955<br>866 | 0.8428<br>31  | 1.<br>11 | 0.6640<br>435 | 0.9394<br>137 | 1.09 | 0.7207<br>76  | 0.7207<br>76  |
| mucate                | 0.5<br>8 | 0.0668<br>632 | 0.2030<br>661 | 0.<br>64 | 0.1450<br>381 | 0.4250<br>714 | 0.71 | 0.2464<br>562 | 0.6467<br>106 | 0.6  | 0.0846<br>946 | 0.5888<br>033 | 1.<br>11 | 0.7300<br>999 | 0.9394<br>137 | 0.95 | 0.8612<br>608 | 0.8612<br>608 |
| oxoproline            | 0.4<br>9 | 0.0715<br>589 | 0.2095<br>654 | 1.<br>31 | 0.4891<br>766 | 0.7532<br>822 | 0.46 | 0.0579<br>725 | 0.3741<br>1   | 0.58 | 0.1569<br>582 | 0.6773<br>984 | 0.<br>67 | 0.2777<br>89  | 0.9394<br>137 | 1.4  | 0.4314<br>399 | 0.4314<br>399 |
| nndimethylglycin<br>e | 1.6<br>6 | 0.0973<br>152 | 0.2672<br>156 | 1.<br>57 | 0.1529<br>418 | 0.4250<br>714 | 1.85 | 0.0468<br>597 | 0.3493<br>174 | 1.61 | 0.1093<br>205 | 0.6403<br>056 | 1.<br>06 | 0.8396<br>561 | 0.9394<br>137 | 1.87 | 0.0712<br>914 | 0.0712<br>914 |
| hydroxyproline        | 1.5<br>9 | 0.0977<br>618 | 0.2672<br>156 | 1.<br>56 | 0.1243<br>202 | 0.3971<br>274 | 1.25 | 0.4282<br>162 | 0.7633<br>419 | 0.91 | 0.7194<br>899 | 0.8428<br>31  | 1.<br>29 | 0.3641<br>615 | 0.9394<br>137 | 1.04 | 0.8956<br>829 | 0.8956<br>829 |
| glutarate             | 0.7<br>4 | 0.1141<br>724 | 0.3020<br>045 | 1.<br>04 | 0.8500<br>923 | 0.9548<br>982 | 0.6  | 0.0137<br>662 | 0.2506<br>09  | 0.65 | 0.0315<br>756 | 0.5888<br>033 | 0.<br>94 | 0.7384<br>127 | 0.9394<br>137 | 1.16 | 0.4957<br>471 | 0.4957<br>471 |

|                    |          |               |               |          |               |               |      |               |               |      |               |               |          |               |               |       |               |               |
|--------------------|----------|---------------|---------------|----------|---------------|---------------|------|---------------|---------------|------|---------------|---------------|----------|---------------|---------------|-------|---------------|---------------|
| his                | 0.6<br>8 | 0.1402<br>084 | 0.3592<br>839 | 1        | 0.9869<br>053 | 0.9870<br>159 | 1.11 | 0.6982<br>864 | 0.8572<br>29  | 0.81 | 0.3920<br>518 | 0.8428<br>31  | 0.       | 0.5499<br>909 | 0.9394<br>137 | 1.01  | 0.9676<br>204 | 0.9676<br>204 |
| creatinine         | 1.5<br>7 | 0.1578<br>526 | 0.3922<br>397 | 1.<br>19 | 0.5810<br>62  | 0.7941<br>18  | 1.43 | 0.2668<br>602 | 0.6467<br>106 | 0.95 | 0.8662<br>224 | 0.8878<br>78  | 1.<br>15 | 0.6648<br>129 | 0.9394<br>137 | 1.14  | 0.6999<br>551 | 0.6999<br>551 |
| cisaconitate       | 1.4<br>9 | 0.1731<br>014 | 0.4174<br>799 | 1.<br>3  | 0.3778<br>84  | 0.7206<br>159 | 1.12 | 0.6971<br>016 | 0.8572<br>29  | 0.8  | 0.4106<br>277 | 0.8428<br>31  | 1.<br>62 | 0.0976<br>695 | 0.9394<br>137 | 1.15  | 0.6843<br>279 | 0.6843<br>279 |
| citrulline         | 0.7      | 0.2113<br>067 | 0.4950<br>615 | 0.<br>75 | 0.3283<br>098 | 0.6730<br>351 | 0.95 | 0.8393<br>602 | 0.9301<br>018 | 0.84 | 0.5036<br>682 | 0.8428<br>31  | 0.<br>73 | 0.2567<br>072 | 0.9394<br>137 | 1.35  | 0.3263<br>181 | 0.3263<br>181 |
| triethanolamine    | 0.7<br>5 | 0.2508<br>534 | 0.5512<br>18  | 1.<br>08 | 0.7548<br>852 | 0.9266<br>366 | 1.02 | 0.9443<br>614 | 0.9802<br>232 | 0.96 | 0.8594<br>695 | 0.8878<br>78  | 0.<br>65 | 0.1050<br>33  | 0.9394<br>137 | 0.81  | 0.4510<br>665 | 0.4510<br>665 |
| uridine            | 1.3<br>6 | 0.2592<br>063 | 0.5512<br>18  | 1.<br>45 | 0.1859<br>522 | 0.4620<br>63  | 1.7  | 0.0610<br>311 | 0.3741<br>1   | 1.37 | 0.2308<br>169 | 0.6840<br>215 | 0.<br>86 | 0.5991<br>183 | 0.9394<br>137 | 1.12  | 0.6906<br>025 | 0.6906<br>025 |
| glycerophosphate   | 0.6<br>6 | 0.2621<br>647 | 0.5512<br>18  | 0.<br>76 | 0.4716<br>979 | 0.7532<br>822 | 0.71 | 0.3671<br>944 | 0.7343<br>888 | 1.03 | 0.9429<br>815 | 0.9544<br>836 | 0.<br>82 | 0.5978<br>079 | 0.9394<br>137 | 1.25  | 0.5953<br>221 | 0.5953<br>221 |
| azelate            | 5.8<br>1 | 0.2508<br>341 | 0.5512<br>18  | 1.<br>61 | 0.7598<br>491 | 0.9266<br>366 | 5.18 | 0.2987<br>837 | 0.6630<br>946 | 2.32 | 0.5788<br>114 | 0.8428<br>31  | 3.<br>81 | 0.4041<br>225 | 0.9394<br>137 | 14.29 | 0.1016<br>193 | 0.1016<br>193 |
| threonate          | 0.7<br>2 | 0.2755<br>784 | 0.5649<br>357 | 0.<br>71 | 0.2738<br>048 | 0.6068<br>106 | 1.28 | 0.4236<br>154 | 0.7633<br>419 | 1.38 | 0.2795<br>99  | 0.7395<br>845 | 0.<br>66 | 0.1829<br>379 | 0.9394<br>137 | 0.91  | 0.7807<br>334 | 0.7807<br>334 |
| citrate            | 1.3<br>3 | 0.2835<br>433 | 0.5670<br>865 | 0.<br>95 | 0.8430<br>62  | 0.9548<br>982 | 1.13 | 0.6471<br>657 | 0.8572<br>29  | 0.74 | 0.2502<br>518 | 0.6840<br>215 | 1.<br>35 | 0.2606<br>754 | 0.9394<br>137 | 0.88  | 0.6501<br>567 | 0.6501<br>567 |
| methylhistidine    | 1.3<br>2 | 0.3203<br>283 | 0.6254<br>029 | 0.<br>98 | 0.9553<br>441 | 0.9870<br>159 | 1.33 | 0.2992<br>012 | 0.6630<br>946 | 1.17 | 0.5657<br>875 | 0.8428<br>31  | 1.<br>14 | 0.6407<br>099 | 0.9394<br>137 | 1.08  | 0.7911<br>057 | 0.7911<br>057 |
| lys                | 0.7<br>7 | 0.3472<br>144 | 0.6327<br>017 | 0.<br>63 | 0.1070<br>229 | 0.3815<br>598 | 1.13 | 0.6564<br>293 | 0.8572<br>29  | 0.75 | 0.2900<br>846 | 0.7433<br>418 | 1.<br>2  | 0.5249<br>744 | 0.9394<br>137 | 1.36  | 0.3282<br>165 | 0.3282<br>165 |
| fumarate           | 1.3<br>6 | 0.3403<br>04  | 0.6327<br>017 | 1.<br>48 | 0.2445<br>652 | 0.5898<br>337 | 1.29 | 0.4279<br>498 | 0.7633<br>419 | 1.5  | 0.1993<br>176 | 0.6840<br>215 | 1.<br>15 | 0.6816<br>147 | 0.9394<br>137 | 1.22  | 0.5782<br>221 | 0.5782<br>221 |
| hexanoate          | 1.3      | 0.3373<br>454 | 0.6327<br>017 | 0.<br>68 | 0.1655<br>895 | 0.4380<br>11  | 1.11 | 0.6976<br>692 | 0.8572<br>29  | 1.11 | 0.6949<br>426 | 0.8428<br>31  | 1.<br>75 | 0.0457<br>334 | 0.9394<br>137 | 1.15  | 0.6401<br>901 | 0.6401<br>901 |
| methylnicotinamide | 0.7<br>7 | 0.3662<br>831 | 0.6521<br>727 | 0.<br>79 | 0.4386<br>988 | 0.7532<br>822 | 1.04 | 0.8800<br>868 | 0.9525<br>044 | 0.7  | 0.2158<br>579 | 0.6840<br>215 | 0.<br>95 | 0.8646<br>341 | 0.9453<br>333 | 0.5   | 0.0477<br>122 | 0.0477<br>122 |
| succinate          | 1.3<br>5 | 0.3738<br>063 | 0.6521<br>727 | 1.<br>99 | 0.0600<br>904 | 0.2463<br>708 | 0.95 | 0.8828<br>09  | 0.9525<br>044 | 0.87 | 0.6670<br>288 | 0.8428<br>31  | 1.<br>54 | 0.2166<br>688 | 0.9394<br>137 | 2.13  | 0.0562<br>919 | 0.0562<br>919 |
| pipecolate         | 1.2      | 0.4488<br>255 | 0.7389<br>272 | 1        | 0.9870<br>159 | 0.9870<br>159 | 1.32 | 0.2681<br>483 | 0.6467<br>106 | 0.94 | 0.8032<br>229 | 0.8878<br>78  | 1.<br>15 | 0.5804<br>345 | 0.9394<br>137 | 1.04  | 0.8851<br>381 | 0.8851<br>381 |
| prolinebetaine     | 0.8      | 0.4505<br>653 | 0.7389<br>272 | 1.<br>21 | 0.5328<br>094 | 0.7532<br>822 | 0.9  | 0.7108<br>728 | 0.8572<br>29  | 0.89 | 0.6858<br>741 | 0.8428<br>31  | 0.<br>9  | 0.7397<br>723 | 0.9394<br>137 | 0.85  | 0.6144<br>253 | 0.6144<br>253 |
| arg                | 1.2      | 0.4363<br>428 | 0.7389<br>272 | 1.<br>06 | 0.7925<br>48  | 0.9418<br>686 | 1.09 | 0.7004<br>439 | 0.8572<br>29  | 0.86 | 0.5054<br>994 | 0.8428<br>31  | 1.<br>09 | 0.7240<br>175 | 0.9394<br>137 | 1.45  | 0.1666<br>297 | 0.1666<br>297 |
| adma               | 0.8<br>6 | 0.5085<br>288 | 0.8176<br>345 | 1.<br>16 | 0.5327<br>071 | 0.7532<br>822 | 1.14 | 0.5867<br>913 | 0.8572<br>29  | 1.13 | 0.5797<br>921 | 0.8428<br>31  | 0.<br>71 | 0.1690<br>53  | 0.9394<br>137 | 0.76  | 0.2668<br>747 | 0.2668<br>747 |
| malate             | 1.2<br>3 | 0.5327<br>517 | 0.8401<br>085 | 2.<br>31 | 0.0223<br>577 | 0.1309<br>524 | 0.78 | 0.4471<br>062 | 0.7634<br>059 | 1.12 | 0.7175<br>375 | 0.8428<br>31  | 0.<br>94 | 0.8411<br>423 | 0.9394<br>137 | 1.61  | 0.2031<br>505 | 0.2031<br>505 |

|                              |          |               |               |          |               |               |      |               |               |      |               |               |          |               |               |      |               |               |
|------------------------------|----------|---------------|---------------|----------|---------------|---------------|------|---------------|---------------|------|---------------|---------------|----------|---------------|---------------|------|---------------|---------------|
| ser                          | 0.8<br>8 | 0.6426<br>187 | 0.8638<br>48  | 1.<br>04 | 0.9023<br>714 | 0.9782<br>536 | 0.72 | 0.2603<br>782 | 0.6467<br>106 | 1.11 | 0.7092<br>261 | 0.8428<br>31  | 0.<br>63 | 0.1287<br>843 | 0.9394<br>137 | 1.93 | 0.0619<br>676 | 0.0619<br>676 |
| betaine                      | 1.1<br>3 | 0.6131<br>468 | 0.8638<br>48  | 0.<br>99 | 0.9604<br>354 | 0.9870<br>159 | 1.06 | 0.8191<br>013 | 0.9301<br>018 | 1.22 | 0.3963<br>727 | 0.8428<br>31  | 1<br>988 | 0.9995<br>988 | 0.9995<br>988 | 1.39 | 0.2276<br>959 | 0.2276<br>959 |
| indole3acetate               | 1.1<br>8 | 0.5797<br>282 | 0.8638<br>48  | 1.<br>32 | 0.3702<br>491 | 0.7206<br>159 | 1.26 | 0.4533<br>622 | 0.7634<br>059 | 0.93 | 0.8093<br>972 | 0.8878<br>78  | 0.<br>87 | 0.6414<br>363 | 0.9394<br>137 | 1.03 | 0.9258<br>652 | 0.9258<br>652 |
| glycerophosphor<br>ylcholine | 0.8<br>5 | 0.5638<br>481 | 0.8638<br>48  | 1.<br>01 | 0.9774<br>505 | 0.9870<br>159 | 0.9  | 0.7002<br>952 | 0.8572<br>29  | 0.85 | 0.5420<br>068 | 0.8428<br>31  | 0.<br>97 | 0.9185<br>995 | 0.9911<br>205 | 0.91 | 0.7509<br>332 | 0.7509<br>332 |
| acetylbutyrate               | 1.1<br>4 | 0.6244<br>749 | 0.8638<br>48  | 0.<br>97 | 0.9066<br>74  | 0.9782<br>536 | 1.09 | 0.7514<br>608 | 0.8678<br>843 | 1.12 | 0.6733<br>582 | 0.8428<br>31  | 1.<br>1  | 0.7191<br>157 | 0.9394<br>137 | 1.6  | 0.1329<br>498 | 0.1329<br>498 |
| octanoate                    | 1.1<br>6 | 0.6135<br>755 | 0.8638<br>48  | 1.<br>22 | 0.5022<br>206 | 0.7532<br>822 | 0.99 | 0.9675<br>177 | 0.9812<br>076 | 0.8  | 0.4256<br>502 | 0.8428<br>31  | 1.<br>13 | 0.6901<br>839 | 0.9394<br>137 | 1.76 | 0.0912<br>441 | 0.0912<br>441 |
| pelargonate                  | 1.3<br>3 | 0.5920<br>176 | 0.8638<br>48  | 1.<br>55 | 0.4276<br>786 | 0.7532<br>822 | 1.48 | 0.4785<br>897 | 0.7848<br>871 | 1.17 | 0.7682<br>627 | 0.8872<br>893 | 1.<br>02 | 0.9730<br>224 | 0.9995<br>988 | 1.35 | 0.6083<br>833 | 0.6083<br>833 |
| decanoate                    | 1.1<br>5 | 0.6324<br>734 | 0.8638<br>48  | 0.<br>83 | 0.5172<br>392 | 0.7532<br>822 | 1.27 | 0.4037<br>961 | 0.7633<br>419 | 0.82 | 0.4852<br>041 | 0.8428<br>31  | 1.<br>22 | 0.4940<br>273 | 0.9394<br>137 | 0.96 | 0.8921<br>044 | 0.8921<br>044 |
| indoxylsulfate               | 1.1<br>5 | 0.5935<br>161 | 0.8638<br>48  | 1.<br>02 | 0.9540<br>654 | 0.9870<br>159 | 1.45 | 0.1752<br>882 | 0.5749<br>453 | 1.23 | 0.4210<br>603 | 0.8428<br>31  | 1.<br>05 | 0.8450<br>378 | 0.9394<br>137 | 1.04 | 0.9024<br>527 | 0.9024<br>527 |
| sarcosine                    | 0.9<br>3 | 0.7641<br>125 | 0.9080<br>758 | 0.<br>92 | 0.7443<br>625 | 0.9266<br>366 | 1.48 | 0.1279<br>861 | 0.4975<br>073 | 1.16 | 0.5333<br>415 | 0.8428<br>31  | 0.<br>93 | 0.7804<br>722 | 0.9394<br>137 | 0.96 | 0.8799<br>956 | 0.8799<br>956 |
| ab                           | 1.1      | 0.7318<br>167 | 0.9080<br>758 | 1.<br>56 | 0.1465<br>854 | 0.4250<br>714 | 1.1  | 0.7397<br>13  | 0.8665<br>209 | 1.12 | 0.6894<br>379 | 0.8428<br>31  | 1.<br>01 | 0.9756<br>784 | 0.9995<br>988 | 2.29 | 0.0173<br>349 | 0.0173<br>349 |
| taurine                      | 0.9<br>2 | 0.7596<br>345 | 0.9080<br>758 | 0.<br>95 | 0.8436<br>146 | 0.9548<br>982 | 1.12 | 0.6633<br>439 | 0.8572<br>29  | 1.25 | 0.3983<br>474 | 0.8428<br>31  | 0.<br>89 | 0.6744<br>416 | 0.9394<br>137 | 0.83 | 0.5072<br>292 | 0.5072<br>292 |
| creatine                     | 0.9<br>2 | 0.7616<br>011 | 0.9080<br>758 | 0.<br>9  | 0.6979<br>126 | 0.9083<br>942 | 0.82 | 0.4561<br>816 | 0.7634<br>059 | 0.9  | 0.6817<br>181 | 0.8428<br>31  | 1.<br>38 | 0.2574<br>403 | 0.9394<br>137 | 1.81 | 0.0693<br>185 | 0.0693<br>185 |
| kynurenine                   | 1.0<br>9 | 0.7428<br>824 | 0.9080<br>758 | 1.<br>46 | 0.1809<br>503 | 0.4620<br>63  | 1.16 | 0.5903<br>75  | 0.8572<br>29  | 0.95 | 0.8535<br>722 | 0.8878<br>78  | 1.<br>14 | 0.6361<br>327 | 0.9394<br>137 | 0.94 | 0.8219<br>646 | 0.8219<br>646 |
| hydroxybutyrate<br>_3        | 1.1<br>3 | 0.6876<br>736 | 0.9080<br>758 | 1.<br>07 | 0.8140<br>148 | 0.9535<br>602 | 1.06 | 0.8390<br>382 | 0.9301<br>018 | 1.13 | 0.6743<br>8   | 0.8428<br>31  | 0.<br>78 | 0.4294<br>396 | 0.9394<br>137 | 1.52 | 0.1884<br>22  | 0.1884<br>22  |
| terephthalate                | 0.9<br>1 | 0.7348<br>754 | 0.9080<br>758 | 0.<br>77 | 0.3896<br>578 | 0.7261<br>805 | 0.75 | 0.3362<br>737 | 0.7070<br>37  | 0.95 | 0.8649<br>301 | 0.8878<br>78  | 1.<br>09 | 0.7623<br>785 | 0.9394<br>137 | 0.95 | 0.8716<br>244 | 0.8716<br>244 |
| hippurate                    | 0.8<br>9 | 0.7015<br>845 | 0.9080<br>758 | 1.<br>44 | 0.2673<br>769 | 0.6068<br>106 | 0.76 | 0.3647<br>869 | 0.7343<br>888 | 0.78 | 0.3959<br>454 | 0.8428<br>31  | 0.<br>93 | 0.8117<br>656 | 0.9394<br>137 | 0.86 | 0.6444<br>793 | 0.6444<br>793 |
| ornithine                    | 0.9<br>4 | 0.8101<br>895 | 0.9138<br>783 | 1.<br>2  | 0.5040<br>559 | 0.7532<br>822 | 0.91 | 0.7393<br>813 | 0.8665<br>209 | 1.49 | 0.1238<br>268 | 0.6769<br>2   | 0.<br>82 | 0.4573<br>933 | 0.9394<br>137 | 1.03 | 0.9183<br>063 | 0.9183<br>063 |
| met                          | 0.9<br>3 | 0.8135<br>746 | 0.9138<br>783 | 0.<br>9  | 0.7364<br>195 | 0.9266<br>366 | 1.03 | 0.9134<br>281 | 0.9602<br>705 | 0.65 | 0.1368<br>82  | 0.6773<br>984 | 1.<br>11 | 0.7279<br>138 | 0.9394<br>137 | 1.8  | 0.0863<br>845 | 0.0863<br>845 |
| oacetylcarnitine             | 1.0<br>7 | 0.8024<br>419 | 0.9138<br>783 | 1.<br>4  | 0.2720<br>379 | 0.6068<br>106 | 1    | 0.9989<br>156 | 0.9989<br>156 | 0.9  | 0.7187<br>662 | 0.8428<br>31  | 0.<br>98 | 0.9436<br>805 | 0.9942<br>817 | 1.02 | 0.9569<br>554 | 0.9569<br>554 |
| cysteinessulfate             | 1.0<br>5 | 0.7882<br>276 | 0.9138<br>783 | 0.<br>97 | 0.8634<br>397 | 0.9567<br>845 | 0.98 | 0.8990<br>086 | 0.9573<br>858 | 1.04 | 0.8381<br>843 | 0.8878<br>78  | 0.<br>88 | 0.5309<br>167 | 0.9394<br>137 | 0.78 | 0.3829<br>889 | 0.3829<br>889 |

|                       |      |           |           |      |           |           |      |           |           |      |           |           |      |           |           |      |           |           |
|-----------------------|------|-----------|-----------|------|-----------|-----------|------|-----------|-----------|------|-----------|-----------|------|-----------|-----------|------|-----------|-----------|
| trp                   | 1.06 | 0.8253974 | 0.9146295 | 1.18 | 0.5723358 | 0.794118  | 1.33 | 0.3220421 | 0.6949329 | 1.02 | 0.9544836 | 0.9544836 | 1.2  | 0.5394997 | 0.9394137 | 1    | 0.989795  | 0.989795  |
| aminoisobutyrate      | 0.96 | 0.8766879 | 0.9463527 | 0.8  | 0.4640074 | 0.7532822 | 1.21 | 0.5085317 | 0.7867849 | 1.25 | 0.4370628 | 0.842831  | 0.98 | 0.9457801 | 0.9942817 | 1.21 | 0.560514  | 0.560514  |
| choline               | 1.07 | 0.8819854 | 0.9463527 | 1.62 | 0.3393206 | 0.6786411 | 0.83 | 0.6936157 | 0.857229  | 1.25 | 0.6303842 | 0.842831  | 0.86 | 0.7569459 | 0.9394137 | 1.7  | 0.356939  | 0.356939  |
| gammabutyrobetaine    | 1.04 | 0.8886483 | 0.9463527 | 0.78 | 0.4263409 | 0.7532822 | 1.01 | 0.9692416 | 0.9812076 | 0.83 | 0.5031017 | 0.842831  | 0.84 | 0.5463529 | 0.9394137 | 1.16 | 0.6406343 | 0.6406343 |
| trimethylaminen oxide | 1.03 | 0.9112283 | 0.9469972 | 1.3  | 0.2861495 | 0.6174805 | 0.88 | 0.5749504 | 0.857229  | 0.67 | 0.0913512 | 0.5888033 | 0.9  | 0.6660484 | 0.9394137 | 1.15 | 0.6042212 | 0.6042212 |
| sdma                  | 0.97 | 0.912351  | 0.9469972 | 0.9  | 0.6866032 | 0.9080881 | 1.18 | 0.5082971 | 0.7867849 | 1.05 | 0.8285817 | 0.887878  | 0.74 | 0.2403919 | 0.9394137 | 1.24 | 0.4392508 | 0.4392508 |
| nacetylaspartate      | 0.98 | 0.9325742 | 0.9558886 | 0.84 | 0.5124913 | 0.7532822 | 0.75 | 0.2777149 | 0.6506463 | 0.89 | 0.6515842 | 0.842831  | 0.95 | 0.8477636 | 0.9394137 | 1.25 | 0.4687519 | 0.4687519 |
| thr                   | 0.98 | 0.9468146 | 0.9585036 | 1.08 | 0.7684303 | 0.9266366 | 1.14 | 0.5999851 | 0.857229  | 0.83 | 0.443821  | 0.842831  | 1.06 | 0.808759  | 0.9394137 | 1.32 | 0.3225564 | 0.3225564 |
| guanidosuccinate      | 0.99 | 0.9670176 | 0.9670176 | 1.12 | 0.6745828 | 0.9068162 | 1.14 | 0.6403164 | 0.857229  | 1.21 | 0.477073  | 0.842831  | 1.09 | 0.7499071 | 0.9394137 | 0.95 | 0.8697846 | 0.8697846 |

\* Indicates metabolite among top 25 highest ranked metabolites in original and sex-stratified models.

Supplementary Table 5c. Sex-stratified logistic regression: TMCS Male Participants Only. Model includes age as a covariate.

| Metabolite            | Me<br>tS<br>OR | MetS<br>p-<br>value | MetS<br>FDR<br>p-<br>value | W<br>C<br>O<br>R | WC p-<br>value | WC<br>FDR<br>p-<br>value | Eleva<br>ted<br>TGs<br>OR | Elevat<br>ed<br>TGs<br>p-<br>value | Elevat<br>ed<br>TGs<br>FDR<br>p-<br>value | Redu<br>ced<br>HDL-<br>c OR | Reduc<br>ed<br>HDL-<br>c p-<br>value | Reduc<br>ed<br>HDL-<br>c FDR<br>p-<br>value | B<br>P<br>O<br>R | BP<br>p-<br>value | BP<br>FDR<br>p-<br>value | Eleva<br>ted<br>FG<br>OR | Elevat<br>ed FG<br>p-<br>value | Elevat<br>ed FG<br>FDR<br>p-<br>value |
|-----------------------|----------------|---------------------|----------------------------|------------------|----------------|--------------------------|---------------------------|------------------------------------|-------------------------------------------|-----------------------------|--------------------------------------|---------------------------------------------|------------------|-------------------|--------------------------|--------------------------|--------------------------------|---------------------------------------|
| glu*                  | 2.75           | 1e-06               | 8.57e-05                   | 2.09             | 0.0028914      | 0.0592737                | 2.45                      | 7e-06                              | 0.0005701                                 | 2                           | 0.0014172                            | 0.1162065                                   | 1                | 0.989881          | 0.9972243                | 1.75                     | 0.0015479                      | 0.0015479                             |
| pro*                  | 1.94           | 8.11e-05            | 0.0024216                  | 1.97             | 0.0010988      | 0.0450526                | 1.76                      | 0.0005138                          | 0.0092671                                 | 1.7                         | 0.0031787                            | 0.1303283                                   | 0.99             | 0.9731995         | 0.9972243                | 1.49                     | 0.0077319                      | 0.0077319                             |
| mucate*               | 0.49           | 8.86e-05            | 0.0024216                  | 0.52             | 0.0026251      | 0.0592737                | 0.54                      | 0.0005651                          | 0.0092671                                 | 0.67                        | 0.035506                             | 0.4852484                                   | 0.55             | 0.0024691         | 0.1214105                | 0.76                     | 0.0934127                      | 0.0934127                             |
| methyl2oxopentanoate* | 2.12           | 0.0001623           | 0.0033278                  | 1.97             | 0.0059247      | 0.0809715                | 1.86                      | 0.0013459                          | 0.0183945                                 | 1.29                        | 0.2327827                            | 0.6582132                                   | 1.73             | 0.0060153         | 0.1233128                | 2.13                     | 5.33e-05                       | 5.33e-05                              |
| isocitrate*           | 2.01           | 0.000258            | 0.0042317                  | 1.75             | 0.0199643      | 0.1278572                | 1.48                      | 0.027367                           | 0.1380811                                 | 1.54                        | 0.0342646                            | 0.4852484                                   | 1.52             | 0.0254807         | 0.2415086                | 1.5                      | 0.0160698                      | 0.0160698                             |
| leu*                  | 1.9            | 0.0006732           | 0.0092006                  | 1.67             | 0.0286774      | 0.1679676                | 1.6                       | 0.009134                           | 0.0576145                                 | 1.43                        | 0.07426                              | 0.4898                                      | 1.26             | 0.2033795         | 0.555904                 | 1.63                     | 0.0038166                      | 0.0038166                             |



|                        |          |               |               |          |               |               |      |               |               |      |               |               |          |               |               |      |               |               |
|------------------------|----------|---------------|---------------|----------|---------------|---------------|------|---------------|---------------|------|---------------|---------------|----------|---------------|---------------|------|---------------|---------------|
| ala*                   | 1.9      | 0.0009<br>818 | 0.0115<br>015 | 2.<br>07 | 0.0037<br>816 | 0.0620<br>179 | 1.72 | 0.0041<br>065 | 0.0306<br>121 | 1.48 | 0.0629<br>032 | 0.4898        | 1.<br>38 | 0.0891<br>659 | 0.4216<br>744 | 1.83 | 0.0006<br>993 | 0.0006<br>993 |
| octanoate              | 0.5<br>4 | 0.0013<br>378 | 0.0137<br>122 | 0.<br>7  | 0.1290<br>395 | 0.4069<br>706 | 0.68 | 0.0338<br>409 | 0.1540<br>441 | 0.87 | 0.4903<br>865 | 0.8042<br>338 | 1.<br>2  | 0.3318<br>17  | 0.7558<br>053 | 0.86 | 0.3529<br>009 | 0.3529<br>009 |
| gly*                   | 0.5<br>4 | 0.0028<br>383 | 0.0258<br>602 | 0.<br>83 | 0.4593<br>949 | 0.6726<br>853 | 0.47 | 0.0003<br>074 | 0.0092<br>671 | 0.96 | 0.8584<br>834 | 0.9839<br>056 | 0.<br>68 | 0.0557<br>152 | 0.3807<br>204 | 0.78 | 0.1608<br>585 | 0.1608<br>585 |
| val*                   | 1.6<br>9 | 0.0034<br>078 | 0.0279<br>437 | 1.<br>57 | 0.0470<br>581 | 0.2411<br>729 | 1.43 | 0.0375<br>717 | 0.1540<br>441 | 1.19 | 0.3767<br>546 | 0.7396<br>741 | 1.<br>17 | 0.3810<br>7   | 0.8012<br>241 | 1.79 | 0.0004<br>641 | 0.0004<br>641 |
| oxoisopentanoate<br>*  | 1.6<br>4 | 0.0039<br>775 | 0.0296<br>502 | 1.<br>73 | 0.0116<br>294 | 0.1192<br>009 | 1.34 | 0.0774<br>425 | 0.2618<br>805 | 1.01 | 0.9435<br>925 | 0.9839<br>056 | 1.<br>35 | 0.0812<br>747 | 0.4216<br>744 | 2.06 | 2.02e-<br>05  | 2.02e-<br>05  |
| ile*                   | 1.7<br>2 | 0.0059<br>633 | 0.0375<br>935 | 1.<br>68 | 0.0381<br>779 | 0.2087<br>061 | 1.52 | 0.0286<br>266 | 0.1380<br>811 | 1.47 | 0.0782<br>995 | 0.4898        | 1.<br>09 | 0.6370<br>379 | 0.9198<br>292 | 1.31 | 0.1256<br>947 | 0.1256<br>947 |
| alphaaminoadipa<br>te* | 1.6<br>7 | 0.0064<br>184 | 0.0375<br>935 | 1.<br>26 | 0.3262<br>123 | 0.5613<br>922 | 1.42 | 0.0524<br>816 | 0.1956<br>131 | 1.21 | 0.3494<br>966 | 0.7396<br>741 | 1.<br>13 | 0.5168<br>464 | 0.8451<br>574 | 1.61 | 0.0056<br>969 | 0.0056<br>969 |
| pyruvate*              | 1.6<br>6 | 0.0058<br>693 | 0.0375<br>935 | 1.<br>31 | 0.2390<br>604 | 0.5026<br>398 | 1.79 | 0.0015<br>738 | 0.0184<br>364 | 1.2  | 0.3635<br>673 | 0.7396<br>741 | 1.<br>28 | 0.1807<br>473 | 0.5335<br>269 | 1.23 | 0.2034<br>005 | 0.2034<br>005 |
| ser*                   | 0.6<br>1 | 0.0071<br>04  | 0.0388<br>355 | 0.<br>69 | 0.1066<br>565 | 0.3975<br>378 | 0.52 | 0.0003<br>623 | 0.0092<br>671 | 1.09 | 0.6628<br>694 | 0.8841<br>883 | 0.<br>67 | 0.0265<br>07  | 0.2415<br>086 | 0.96 | 0.8214<br>274 | 0.8214<br>274 |
| lactate*               | 1.5<br>7 | 0.0102<br>332 | 0.0493<br>902 | 1.<br>72 | 0.0147<br>294 | 0.1255<br>316 | 1.54 | 0.0136<br>179 | 0.0797<br>62  | 1.11 | 0.5856<br>019 | 0.8774<br>242 | 1.<br>77 | 0.0029<br>612 | 0.1214<br>105 | 1.64 | 0.0033<br>184 | 0.0033<br>184 |
| cisaconitate*          | 1.5<br>8 | 0.0102<br>394 | 0.0493<br>902 | 1.<br>5  | 0.0735<br>154 | 0.3349<br>037 | 1.14 | 0.4545<br>817 | 0.6012<br>209 | 1.37 | 0.1135<br>968 | 0.5813<br>716 | 1.<br>62 | 0.0083<br>272 | 0.1365<br>664 | 1.44 | 0.0230<br>938 | 0.0230<br>938 |
| tyr*                   | 1.5<br>6 | 0.0130<br>614 | 0.0595<br>018 | 2.<br>24 | 0.0007<br>212 | 0.0450<br>526 | 1.25 | 0.1994<br>505 | 0.3634<br>431 | 1.17 | 0.4392<br>185 | 0.7396<br>741 | 0.<br>97 | 0.8771<br>841 | 0.9972<br>243 | 1.38 | 0.0545<br>048 | 0.0545<br>048 |
| cystine*               | 1.5<br>8 | 0.0174<br>156 | 0.0751<br>621 | 1.<br>43 | 0.1456<br>552 | 0.4265<br>617 | 1.09 | 0.6435<br>529 | 0.7508<br>404 | 1.38 | 0.1355<br>648 | 0.5813<br>716 | 1.<br>37 | 0.1019<br>079 | 0.4216<br>744 | 1.14 | 0.4593<br>525 | 0.4593<br>525 |
| acetylbutyrate         | 0.6<br>4 | 0.0192<br>553 | 0.0789<br>469 | 0.<br>95 | 0.8375<br>801 | 0.9281<br>293 | 0.75 | 0.1161<br>074 | 0.2912<br>645 | 0.7  | 0.0836<br>244 | 0.4898        | 0.<br>67 | 0.0346<br>29  | 0.2581<br>437 | 0.96 | 0.7946<br>02  | 0.7946<br>02  |
| gln*                   | 0.6<br>6 | 0.0253<br>904 | 0.0991<br>437 | 0.<br>94 | 0.7727<br>024 | 0.9003<br>749 | 0.56 | 0.0024<br>834 | 0.0254<br>544 | 0.96 | 0.8610<br>095 | 0.9839<br>056 | 0.<br>66 | 0.0294<br>553 | 0.2415<br>331 | 1.07 | 0.6830<br>154 | 0.6830<br>154 |
| threonate              | 0.6<br>8 | 0.0269<br>365 | 0.1003<br>997 | 0.<br>59 | 0.0201<br>423 | 0.1278<br>572 | 0.75 | 0.1022<br>275 | 0.2775<br>732 | 0.9  | 0.5885<br>163 | 0.8774<br>242 | 0.<br>58 | 0.0045<br>008 | 0.1230<br>23  | 0.88 | 0.4235<br>634 | 0.4235<br>634 |
| decanoate              | 0.7<br>1 | 0.0295<br>99  | 0.1055<br>269 | 1.<br>23 | 0.2817<br>106 | 0.5368<br>316 | 0.73 | 0.0369<br>431 | 0.1540<br>441 | 0.8  | 0.1987<br>207 | 0.6582<br>132 | 1.<br>06 | 0.7023<br>964 | 0.9289<br>758 | 0.94 | 0.6392<br>986 | 0.6392<br>986 |
| his                    | 1.4<br>7 | 0.0345<br>326 | 0.1179<br>864 | 1.<br>76 | 0.0153<br>087 | 0.1255<br>316 | 1.21 | 0.2804<br>363 | 0.4312<br>915 | 1.01 | 0.9455<br>432 | 0.9839<br>056 | 1.<br>17 | 0.4035<br>127 | 0.8036<br>663 | 1    | 0.9838<br>884 | 0.9838<br>884 |
| hydroxybutyrate<br>_2* | 1.4<br>6 | 0.0409<br>824 | 0.1344<br>221 | 1.<br>03 | 0.9118<br>95  | 0.9692<br>614 | 1.44 | 0.0451<br>325 | 0.1762<br>317 | 1.26 | 0.2619<br>864 | 0.7160<br>962 | 1.<br>29 | 0.1727<br>165 | 0.5335<br>269 | 1.44 | 0.0297<br>886 | 0.0297<br>886 |
| trp                    | 1.4<br>6 | 0.0461<br>792 | 0.1456<br>421 | 1.<br>37 | 0.1953<br>213 | 0.4730<br>107 | 1.37 | 0.0862<br>289 | 0.2618<br>805 | 1.18 | 0.4328<br>979 | 0.7396<br>741 | 0.<br>88 | 0.4973<br>46  | 0.8451<br>574 | 1.02 | 0.9086<br>656 | 0.9086<br>656 |
| phe                    | 1.4<br>1 | 0.0505<br>955 | 0.1536<br>604 | 1.<br>53 | 0.0583<br>682 | 0.2815<br>41  | 1.25 | 0.1989<br>577 | 0.3634<br>431 | 1.27 | 0.2283<br>498 | 0.6582<br>132 | 0.<br>98 | 0.8925<br>115 | 0.9972<br>243 | 1.26 | 0.1504<br>757 | 0.1504<br>757 |

|                    |      |           |           |      |           |           |      |           |           |      |           |           |      |           |           |      |           |           |
|--------------------|------|-----------|-----------|------|-----------|-----------|------|-----------|-----------|------|-----------|-----------|------|-----------|-----------|------|-----------|-----------|
| methylnicotinamide | 1.43 | 0.0582021 | 0.1590856 | 1.99 | 0.0078172 | 0.0915733 | 1.27 | 0.1868024 | 0.3634431 | 1.18 | 0.4234607 | 0.7396741 | 0.   | 0.97313   | 0.9972243 | 1.19 | 0.3217287 | 0.3217287 |
| gammabutyrobetaine | 0.71 | 0.0559189 | 0.1590856 | 0.93 | 0.7645565 | 0.9003749 | 0.63 | 0.0088045 | 0.0576145 | 0.76 | 0.1677044 | 0.6250801 | 1.23 | 0.255279  | 0.6338839 | 1.03 | 0.8543008 | 0.8543008 |
| citrulline         | 0.72 | 0.0569016 | 0.1590856 | 0.82 | 0.3663236 | 0.5832479 | 0.6  | 0.0035815 | 0.029368  | 0.92 | 0.6572093 | 0.8841883 | 1.07 | 0.6853907 | 0.9289758 | 0.97 | 0.8650805 | 0.8650805 |
| choline            | 1.38 | 0.0615751 | 0.1628761 | 1.1  | 0.642806  | 0.8330408 | 1.27 | 0.1597218 | 0.3446629 | 0.93 | 0.7183492 | 0.9203849 | 1.33 | 0.1028913 | 0.4216744 | 1.37 | 0.0491562 | 0.0491562 |
| asp                | 1.38 | 0.0688978 | 0.1765506 | 1.29 | 0.2516732 | 0.51593   | 1.35 | 0.0895644 | 0.2622957 | 1.21 | 0.3424455 | 0.7396741 | 0.95 | 0.8016645 | 0.9960074 | 1.07 | 0.6809821 | 0.6809821 |
| hexanoate          | 0.73 | 0.0779384 | 0.1936651 | 1    | 0.9852202 | 0.9852202 | 0.79 | 0.175204  | 0.3538038 | 0.74 | 0.1488878 | 0.5813716 | 1.04 | 0.8438608 | 0.9972243 | 1.09 | 0.5915317 | 0.5915317 |
| oxoproline         | 0.73 | 0.0854047 | 0.205976  | 0.94 | 0.7973777 | 0.9081246 | 0.73 | 0.0844966 | 0.2618805 | 1.11 | 0.6130699 | 0.8841883 | 1.02 | 0.9049082 | 0.9972243 | 1    | 0.9964665 | 0.9964665 |
| carnitine          | 1.38 | 0.0929121 | 0.2116331 | 1.37 | 0.1961264 | 0.4730107 | 1.29 | 0.1766076 | 0.3538038 | 0.92 | 0.6793154 | 0.8841883 | 1.4  | 0.0778105 | 0.4216744 | 1.26 | 0.1756068 | 0.1756068 |
| succinate          | 0.74 | 0.0913651 | 0.2116331 | 0.84 | 0.4524922 | 0.6726853 | 0.77 | 0.1464093 | 0.3430162 | 0.83 | 0.3539649 | 0.7396741 | 0.83 | 0.3277705 | 0.7558053 | 0.89 | 0.5052912 | 0.5052912 |
| cysteinessulfate   | 1.63 | 0.0998715 | 0.2213368 | 0.96 | 0.9164838 | 0.9692614 | 1.15 | 0.619966  | 0.7367711 | 1.52 | 0.2119271 | 0.6582132 | 0.86 | 0.6156569 | 0.9178885 | 1.44 | 0.1658033 | 0.1658033 |
| hydroxybutyrate_3  | 0.74 | 0.1114407 | 0.2404773 | 0.74 | 0.2203512 | 0.4883459 | 0.66 | 0.0275118 | 0.1380811 | 0.85 | 0.430869  | 0.7396741 | 1.1  | 0.6023659 | 0.9147038 | 0.94 | 0.7210901 | 0.7210901 |
| betaine            | 0.75 | 0.1211593 | 0.2487587 | 0.69 | 0.1231021 | 0.403775  | 0.73 | 0.0839527 | 0.2618805 | 0.69 | 0.0752459 | 0.4898805 | 1.24 | 0.2514826 | 0.6338839 | 0.84 | 0.3121875 | 0.3121875 |
| creatine           | 1.32 | 0.1213457 | 0.2487587 | 1.27 | 0.2989254 | 0.5447085 | 1.34 | 0.0959959 | 0.2714366 | 1.19 | 0.3844622 | 0.7396741 | 1.01 | 0.9770963 | 0.9972243 | 1.18 | 0.3113215 | 0.3113215 |
| hydroxyproline     | 1.3  | 0.1358525 | 0.2519213 | 0.75 | 0.2280083 | 0.4920178 | 1.28 | 0.1541115 | 0.3446629 | 1.27 | 0.2186485 | 0.6582132 | 0.89 | 0.5359409 | 0.8451574 | 0.81 | 0.2042843 | 0.2042843 |
| triethanolamine    | 1.24 | 0.1382495 | 0.2519213 | 1.27 | 0.2019455 | 0.4731295 | 1.16 | 0.2892809 | 0.4312915 | 1.27 | 0.1446164 | 0.5813716 | 1.22 | 0.1463598 | 0.5000627 | 0.96 | 0.7337198 | 0.7337198 |
| arg                | 0.76 | 0.1273905 | 0.2519213 | 1.36 | 0.1758757 | 0.4730107 | 0.59 | 0.0034622 | 0.029368  | 0.73 | 0.1250223 | 0.5813716 | 0.78 | 0.1670629 | 0.5335269 | 1.05 | 0.7499456 | 0.7499456 |
| oacetylcarnitine   | 1.32 | 0.1326364 | 0.2519213 | 1.24 | 0.3698645 | 0.5832479 | 1.25 | 0.2172602 | 0.3798348 | 0.81 | 0.3196893 | 0.7396741 | 1.29 | 0.1886864 | 0.5335269 | 1.18 | 0.3368885 | 0.3368885 |
| terephthalate      | 0.75 | 0.1305719 | 0.2519213 | 1.15 | 0.5585469 | 0.7762856 | 0.87 | 0.4407991 | 0.6012209 | 1.2  | 0.3815544 | 0.7396741 | 0.88 | 0.480746  | 0.8451574 | 0.78 | 0.1504097 | 0.1504097 |
| pipecolate         | 1.27 | 0.1584342 | 0.2824262 | 1.1  | 0.6758017 | 0.8525498 | 0.93 | 0.6810733 | 0.7547028 | 0.92 | 0.6699349 | 0.8841883 | 1.16 | 0.4076762 | 0.8036663 | 1.08 | 0.6345405 | 0.6345405 |
| glutarate          | 1.28 | 0.163356  | 0.285004  | 0.99 | 0.9574411 | 0.9692614 | 1.25 | 0.196505  | 0.3634431 | 1.72 | 0.0080094 | 0.2189234 | 0.86 | 0.4116339 | 0.8036663 | 1.16 | 0.3634675 | 0.3634675 |
| sarcosine          | 1.26 | 0.1778203 | 0.3037764 | 1.08 | 0.7334288 | 0.898975  | 1.04 | 0.8141066 | 0.8669707 | 0.99 | 0.9783734 | 0.9839056 | 0.97 | 0.8603455 | 0.9972243 | 1    | 0.9871804 | 0.9871804 |

|                          |          |               |               |          |               |               |      |               |               |      |               |               |          |               |               |      |               |               |
|--------------------------|----------|---------------|---------------|----------|---------------|---------------|------|---------------|---------------|------|---------------|---------------|----------|---------------|---------------|------|---------------|---------------|
| pelargonate              | 0.7<br>9 | 0.2043<br>726 | 0.3420<br>112 | 0.<br>74 | 0.2109<br>787 | 0.4805<br>627 | 0.83 | 0.3138<br>751 | 0.4596<br>029 | 0.72 | 0.1305<br>513 | 0.5813<br>716 | 1.<br>34 | 0.1284<br>261 | 0.4786<br>793 | 1.11 | 0.5250<br>441 | 0.5250<br>441 |
| prolinebetaine           | 0.7<br>9 | 0.2160<br>121 | 0.3473<br>136 | 0.<br>76 | 0.2671<br>872 | 0.5222<br>631 | 0.74 | 0.1049<br>362 | 0.2775<br>732 | 0.91 | 0.6352<br>2   | 0.8841<br>883 | 1.<br>13 | 0.5315<br>778 | 0.8451<br>574 | 0.98 | 0.8910<br>957 | 0.8910<br>957 |
| urate                    | 1.2<br>5 | 0.2153<br>656 | 0.3473<br>136 | 1.<br>12 | 0.6258<br>59  | 0.8277<br>491 | 1.03 | 0.8770<br>648 | 0.9220<br>424 | 0.96 | 0.8597<br>714 | 0.9839<br>056 | 1.<br>31 | 0.1417<br>585 | 0.5000<br>627 | 1.31 | 0.1015<br>802 | 0.1015<br>802 |
| glycerophosphorylcholine | 1.2<br>4 | 0.2441<br>104 | 0.3849<br>433 | 0.<br>78 | 0.2880<br>56  | 0.5368<br>316 | 1.33 | 0.1172<br>162 | 0.2912<br>645 | 1.33 | 0.1783<br>61  | 0.6358<br>956 | 1.<br>37 | 0.1011<br>156 | 0.4216<br>744 | 0.96 | 0.8242<br>29  | 0.8242<br>29  |
| taurine                  | 1.2<br>2 | 0.2850<br>529 | 0.4174<br>088 | 1.<br>51 | 0.0819<br>129 | 0.3498<br>573 | 1.25 | 0.2177<br>102 | 0.3798<br>348 | 1.51 | 0.0475<br>609 | 0.4898        | 1.<br>06 | 0.7437<br>613 | 0.9382<br>835 | 0.99 | 0.9568<br>189 | 0.9568<br>189 |
| guanidosuccinate         | 0.8<br>1 | 0.2850<br>596 | 0.4174<br>088 | 0.<br>79 | 0.3488<br>612 | 0.5721<br>323 | 0.83 | 0.3384<br>344 | 0.4868<br>706 | 0.68 | 0.0792<br>854 | 0.4898        | 0.<br>84 | 0.3753<br>526 | 0.8012<br>241 | 0.88 | 0.4666<br>303 | 0.4666<br>303 |
| fumarate                 | 0.8<br>2 | 0.2703<br>65  | 0.4174<br>088 | 0.<br>88 | 0.5873<br>046 | 0.8026<br>496 | 0.91 | 0.5983<br>165 | 0.7214<br>994 | 1.01 | 0.9566<br>534 | 0.9839<br>056 | 1.<br>35 | 0.1079<br>898 | 0.4216<br>744 | 0.95 | 0.7813<br>276 | 0.7813<br>276 |
| oxoglutarate             | 1.1<br>8 | 0.2832<br>198 | 0.4174<br>088 | 1.<br>17 | 0.4281<br>026 | 0.6500<br>818 | 1.18 | 0.2832<br>015 | 0.4312<br>915 | 1.15 | 0.4262<br>312 | 0.7396<br>741 | 1.<br>17 | 0.3415<br>781 | 0.7570<br>109 | 1.16 | 0.3077<br>423 | 0.3077<br>423 |
| citrate                  | 0.8<br>4 | 0.3163<br>77  | 0.4551<br>388 | 1.<br>46 | 0.0895<br>976 | 0.3498<br>573 | 0.83 | 0.2886<br>119 | 0.4312<br>915 | 0.93 | 0.7343<br>255 | 0.9263<br>798 | 1.<br>12 | 0.5377<br>379 | 0.8451<br>574 | 0.97 | 0.8723<br>388 | 0.8723<br>388 |
| aminoisobutyrate         | 0.8<br>3 | 0.3434<br>897 | 0.4856<br>234 | 0.<br>72 | 0.1842<br>604 | 0.4730<br>107 | 0.71 | 0.0741<br>838 | 0.2618<br>805 | 0.89 | 0.5819<br>339 | 0.8774<br>242 | 1<br>113 | 0.9947<br>243 | 0.9972        | 0.8  | 0.2173<br>973 | 0.2173<br>973 |
| sdma                     | 1.1<br>8 | 0.3596<br>492 | 0.4983<br>133 | 0.<br>98 | 0.9312<br>818 | 0.9692<br>614 | 1.14 | 0.4501<br>107 | 0.6012<br>209 | 1.18 | 0.4001<br>542 | 0.7396<br>741 | 0.<br>92 | 0.6506<br>109 | 0.9198<br>292 | 1.02 | 0.9240<br>793 | 0.9240<br>793 |
| glucuronate              | 1.1<br>7 | 0.3646<br>195 | 0.4983<br>133 | 1.<br>43 | 0.1164<br>284 | 0.4037<br>75  | 1.24 | 0.2311<br>912 | 0.3868<br>914 | 1.43 | 0.0744<br>787 | 0.4898        | 1.<br>16 | 0.4322<br>397 | 0.8242<br>711 | 1.06 | 0.7216<br>988 | 0.7216<br>988 |
| betaala                  | 1.1<br>6 | 0.4103<br>37  | 0.5340<br>894 | 1.<br>51 | 0.0861<br>291 | 0.3498<br>573 | 1.02 | 0.9204<br>002 | 0.9553<br>521 | 1.01 | 0.9694<br>348 | 0.9839<br>056 | 1.<br>08 | 0.6921<br>045 | 0.9289<br>758 | 1.24 | 0.2044<br>963 | 0.2044<br>963 |
| met                      | 1.1<br>5 | 0.4041<br>553 | 0.5340<br>894 | 1.<br>42 | 0.1353<br>706 | 0.4111<br>257 | 0.99 | 0.9567        | 0.9685<br>112 | 1.1  | 0.6190<br>416 | 0.8841<br>883 | 1.<br>33 | 0.0828<br>662 | 0.4216<br>744 | 1.01 | 0.9641<br>975 | 0.9641<br>975 |
| indoxylsulfate           | 1.1<br>6 | 0.4100<br>81  | 0.5340<br>894 | 1.<br>26 | 0.3286<br>198 | 0.5613<br>922 | 1.13 | 0.4667<br>515 | 0.6075<br>178 | 1.13 | 0.5435<br>346 | 0.8571<br>123 | 1.<br>02 | 0.9000<br>777 | 0.9972<br>243 | 1.05 | 0.7419<br>32  | 0.7419<br>32  |
| trimethylaminen oxide    | 0.8<br>7 | 0.4578<br>932 | 0.5776<br>499 | 0.<br>84 | 0.4718<br>036 | 0.6787<br>35  | 0.88 | 0.4847<br>847 | 0.6211<br>304 | 0.72 | 0.1295<br>544 | 0.5813<br>716 | 1.<br>02 | 0.9186<br>677 | 0.9972<br>243 | 1.07 | 0.6975<br>324 | 0.6975<br>324 |
| methylhistidine          | 1.1<br>4 | 0.4516<br>971 | 0.5776<br>499 | 1.<br>05 | 0.8305<br>74  | 0.9281<br>293 | 0.99 | 0.9409<br>798 | 0.9645<br>043 | 0.91 | 0.6631<br>93  | 0.8841<br>883 | 1.<br>14 | 0.4979<br>6   | 0.8451<br>574 | 0.88 | 0.4529<br>073 | 0.4529<br>073 |
| lys                      | 1.1<br>3 | 0.4818<br>7   | 0.5986<br>87  | 1.<br>36 | 0.1874<br>784 | 0.4730<br>107 | 1    | 0.9833<br>135 | 0.9833<br>135 | 0.95 | 0.7887<br>564 | 0.9653<br>437 | 0.<br>65 | 0.0255<br>16  | 0.2415<br>086 | 1.04 | 0.8240<br>446 | 0.8240<br>446 |
| uridine                  | 1.1<br>3 | 0.4954<br>634 | 0.6063<br>881 | 1.<br>42 | 0.1222<br>399 | 0.4037<br>75  | 0.93 | 0.6978<br>469 | 0.7629<br>793 | 1.28 | 0.2091<br>366 | 0.6582<br>132 | 1.<br>12 | 0.5462<br>603 | 0.8451<br>574 | 1.09 | 0.6159<br>949 | 0.6159<br>949 |
| adma                     | 0.9      | 0.5336<br>54  | 0.6435<br>24  | 1.<br>07 | 0.7795<br>929 | 0.9003<br>749 | 0.82 | 0.2637<br>054 | 0.4312<br>915 | 1.14 | 0.5035<br>619 | 0.8096<br>486 | 1        | 0.9972<br>243 | 0.9972<br>243 | 0.99 | 0.9495<br>874 | 0.9495<br>874 |
| glycerophosphate         | 1.1      | 0.5817<br>326 | 0.6913<br>344 | 1.<br>01 | 0.9529<br>066 | 0.9692<br>614 | 1.27 | 0.1567<br>588 | 0.3446<br>629 | 0.99 | 0.9759<br>328 | 0.9839<br>056 | 1.<br>22 | 0.2628<br>299 | 0.6338<br>839 | 0.81 | 0.1745<br>815 | 0.1745<br>815 |

|                   |          |               |               |          |               |               |      |               |               |      |               |               |          |               |               |      |               |               |
|-------------------|----------|---------------|---------------|----------|---------------|---------------|------|---------------|---------------|------|---------------|---------------|----------|---------------|---------------|------|---------------|---------------|
| kynurenine        | 1.1      | 0.5963<br>701 | 0.6986<br>05  | 1.<br>73 | 0.0202<br>7   | 0.1278<br>572 | 1.11 | 0.5483<br>449 | 0.6711<br>087 | 1.01 | 0.9760<br>421 | 0.9839<br>056 | 0.<br>89 | 0.5367<br>574 | 0.8451<br>574 | 0.83 | 0.2461<br>374 | 0.2461<br>374 |
| azelate           | 1.0<br>8 | 0.6547<br>467 | 0.7561<br>864 | 0.<br>83 | 0.3833<br>477 | 0.5931<br>039 | 1.26 | 0.1769<br>019 | 0.3538<br>038 | 1.52 | 0.0294<br>314 | 0.4852<br>484 | 0.<br>96 | 0.8158<br>795 | 0.9972<br>243 | 0.92 | 0.5830<br>889 | 0.5830<br>889 |
| creatinine        | 0.9<br>3 | 0.6785<br>224 | 0.7727<br>617 | 1.<br>26 | 0.3121<br>624 | 0.5564<br>634 | 0.77 | 0.1356<br>053 | 0.3270<br>482 | 0.94 | 0.7596<br>447 | 0.9438<br>01  | 1.<br>03 | 0.8532<br>831 | 0.9972<br>243 | 1.05 | 0.7533<br>669 | 0.7533<br>669 |
| ab                | 1.0<br>6 | 0.7442<br>473 | 0.8360<br>038 | 0.<br>87 | 0.5558<br>288 | 0.7762<br>856 | 0.89 | 0.5473<br>176 | 0.6711<br>087 | 1    | 0.9839<br>056 | 0.9839<br>056 | 1.<br>07 | 0.7404<br>651 | 0.9382<br>835 | 1.35 | 0.0910<br>694 | 0.0910<br>694 |
| guanidinoacetate  | 0.9<br>5 | 0.7754<br>104 | 0.8592<br>386 | 0.<br>98 | 0.9441<br>628 | 0.9692<br>614 | 0.83 | 0.2842<br>388 | 0.4312<br>915 | 0.86 | 0.4420<br>004 | 0.7396<br>741 | 0.<br>93 | 0.6687<br>821 | 0.9289<br>758 | 1.16 | 0.3638<br>64  | 0.3638<br>64  |
| asn               | 1.0<br>5 | 0.7864<br>771 | 0.8598<br>816 | 1.<br>01 | 0.9500<br>228 | 0.9692<br>614 | 0.86 | 0.3750<br>782 | 0.5212<br>952 | 1.2  | 0.3496<br>239 | 0.7396<br>741 | 0.<br>73 | 0.0809<br>805 | 0.4216<br>744 | 1.22 | 0.2203<br>27  | 0.2203<br>27  |
| nndimethylglycine | 0.9<br>7 | 0.8719<br>363 | 0.9407<br>734 | 0.<br>92 | 0.7384<br>661 | 0.8989<br>75  | 0.93 | 0.6676<br>837 | 0.7508<br>404 | 1.02 | 0.9077<br>597 | 0.9839<br>056 | 1.<br>07 | 0.7268<br>91  | 0.9382<br>835 | 0.95 | 0.7687<br>658 | 0.7687<br>658 |
| thr               | 0.9<br>8 | 0.9274<br>74  | 0.9510<br>357 | 1.<br>13 | 0.5972<br>817 | 0.8029<br>033 | 0.93 | 0.6684<br>31  | 0.7508<br>404 | 1.19 | 0.3803<br>915 | 0.7396<br>741 | 1.<br>01 | 0.9756<br>016 | 0.9972<br>243 | 1.02 | 0.9105<br>684 | 0.9105<br>684 |
| ornithine         | 0.9<br>9 | 0.9394<br>377 | 0.9510<br>357 | 1.<br>28 | 0.2675<br>006 | 0.5222<br>631 | 0.86 | 0.3667<br>134 | 0.5184<br>569 | 1.01 | 0.9701<br>572 | 0.9839<br>056 | 0.<br>79 | 0.1831<br>724 | 0.5335<br>269 | 0.92 | 0.5905<br>841 | 0.5905<br>841 |
| indole3acetate    | 0.9<br>9 | 0.9377<br>638 | 0.9510<br>357 | 1.<br>26 | 0.3442<br>591 | 0.5721<br>323 | 0.94 | 0.7178<br>488 | 0.7745<br>21  | 0.96 | 0.8511<br>773 | 0.9839<br>056 | 0.<br>79 | 0.2168<br>613 | 0.5736<br>332 | 1.06 | 0.7158<br>251 | 0.7158<br>251 |
| nacetylaspartate  | 1.0<br>2 | 0.9253<br>068 | 0.9510<br>357 | 0.<br>69 | 0.1594<br>088 | 0.4507<br>421 | 1.09 | 0.6624<br>036 | 0.7508<br>404 | 1.19 | 0.4367<br>109 | 0.7396<br>741 | 1.<br>16 | 0.4770<br>656 | 0.8451<br>574 | 0.93 | 0.7061<br>221 | 0.7061<br>221 |
| hippurate         | 0.9<br>8 | 0.9135<br>053 | 0.9510<br>357 | 0.<br>92 | 0.6501<br>782 | 0.8330<br>408 | 0.84 | 0.2237<br>255 | 0.3821<br>978 | 1.01 | 0.9743<br>715 | 0.9839<br>056 | 1.<br>07 | 0.6396<br>03  | 0.9198<br>292 | 1.05 | 0.7162<br>367 | 0.7162<br>367 |
| malate            | 1        | 0.9793<br>603 | 0.9793<br>603 | 1.<br>08 | 0.7454<br>915 | 0.8989<br>75  | 0.89 | 0.5141<br>407 | 0.6486<br>083 | 0.83 | 0.3350<br>275 | 0.7396<br>741 | 1.<br>54 | 0.0197<br>557 | 0.2415<br>086 | 1.23 | 0.2047<br>574 | 0.2047<br>574 |

\* Indicates metabolite among top 25 highest ranked metabolites in original and sex-stratified analyses.

Supplementary Table 5d. Sex-stratified logistic regression: TMCS Female Participants Only. Model includes age as a covariate.

| Metabolite | Me<br>tS<br>OR | MetS<br>p-<br>value | MetS<br>FDR<br>p-<br>value | W<br>C<br>O<br>R | WC p-<br>value | WC<br>FDR<br>p-<br>value | Eleva<br>ted<br>TGs<br>OR | Elevat<br>ed<br>TGs<br>p-<br>value | Elevat<br>ed<br>TGs<br>FDR<br>p-<br>value | Redu<br>ced<br>HDL-<br>c OR | Reduc<br>ed<br>HDL-<br>c p-<br>value | Reduc<br>ed<br>HDL-<br>c FDR<br>p-<br>value | B<br>P<br>O<br>R | BP p-<br>value | BP<br>FDR<br>p-<br>value | Eleva<br>ted<br>FG<br>OR | Elevat<br>ed FG<br>p-<br>value | Elevat<br>ed FG<br>FDR<br>p-<br>value |
|------------|----------------|---------------------|----------------------------|------------------|----------------|--------------------------|---------------------------|------------------------------------|-------------------------------------------|-----------------------------|--------------------------------------|---------------------------------------------|------------------|----------------|--------------------------|--------------------------|--------------------------------|---------------------------------------|
| glu*       | 2.4<br>3       | 4e-07               | 2.97e-<br>05               | 2.<br>59         | 2e-07          | 1.92e-<br>05             | 1.88                      | 0.0001<br>629                      | 0.0066<br>799                             | 1.76                        | 0.0006<br>828                        | 0.0186<br>621                               | 1.<br>21         | 0.2561<br>995  | 0.6565<br>113            | 1.37                     | 0.0482<br>356                  | 0.0482<br>356                         |
| pro*       | 2.1<br>9       | 8e-07               | 3.39e-<br>05               | 1.<br>54         | 0.0050<br>53   | 0.0295<br>961            | 1.39                      | 0.0224<br>203                      | 0.1521<br>035                             | 1.39                        | 0.0252<br>878                        | 0.1644<br>181                               | 1.<br>57         | 0.0041<br>45   | 0.1699<br>456            | 2.11                     | 1.9e-<br>06                    | 1.9e-<br>06                           |

|                       |      |           |           |      |           |           |      |           |           |      |           |           |      |           |           |      |           |           |
|-----------------------|------|-----------|-----------|------|-----------|-----------|------|-----------|-----------|------|-----------|-----------|------|-----------|-----------|------|-----------|-----------|
| methyl2oxopentanoate* | 2.05 | 7.2e-06   | 0.0001979 | 1.25 | 0.1526482 | 0.4037792 | 1.69 | 0.0007088 | 0.019373  | 1.71 | 0.0005282 | 0.0186621 | 1.23 | 0.1922805 | 0.6519156 | 1.51 | 0.0067459 | 0.0067459 |
| cystine*              | 2.08 | 1.44e-05  | 0.0002942 | 1.35 | 0.0702021 | 0.2398572 | 1.93 | 9.67e-05  | 0.0066799 | 2.08 | 1.92e-05  | 0.0015748 | 1.39 | 0.0500278 | 0.4558085 | 1.75 | 0.0007032 | 0.0007032 |
| ile*                  | 1.86 | 4.28e-05  | 0.0007025 | 1.55 | 0.004195  | 0.0280418 | 1.42 | 0.0154249 | 0.1521035 | 1.45 | 0.0113264 | 0.1203674 | 1.11 | 0.4895443 | 0.7955428 | 1.45 | 0.0111854 | 0.0111854 |
| leu*                  | 1.88 | 0.0001022 | 0.0013973 | 1.93 | 1e-04     | 0.0033918 | 1.46 | 0.01726   | 0.1521035 | 1.45 | 0.0197008 | 0.1615466 | 1.12 | 0.484904  | 0.7955428 | 1.61 | 0.0028719 | 0.0028719 |
| alphaaminoadipate*    | 1.78 | 0.0001655 | 0.0019382 | 1.67 | 0.0013877 | 0.0162556 | 1.36 | 0.0385086 | 0.1754279 | 1.39 | 0.0260663 | 0.1644181 | 1.36 | 0.0491221 | 0.4558085 | 1.78 | 0.0001651 | 0.0001651 |
| val*                  | 1.75 | 0.0003388 | 0.0033231 | 1.84 | 0.0002026 | 0.0038113 | 1.29 | 0.0917038 | 0.3133213 | 1.25 | 0.1383013 | 0.4200262 | 1.16 | 0.345577  | 0.7658734 | 1.91 | 5.1e-05   | 5.1e-05   |
| oxoisopentanoate*     | 1.78 | 0.0003647 | 0.0033231 | 1.33 | 0.0822891 | 0.2595272 | 1.44 | 0.0215826 | 0.1521035 | 1.44 | 0.0227178 | 0.1644181 | 1.08 | 0.6339653 | 0.7965831 | 1.55 | 0.0064909 | 0.0064909 |
| guanidinosuccinate*   | 0.57 | 0.0006039 | 0.004952  | 0.61 | 0.0028312 | 0.0211051 | 0.71 | 0.0296654 | 0.1715092 | 0.67 | 0.0117432 | 0.1203674 | 0.95 | 0.7527027 | 0.8817375 | 0.68 | 0.0156084 | 0.0156084 |
| ser*                  | 0.68 | 0.0007864 | 0.0058619 | 0.59 | 0.0007733 | 0.0105685 | 0.81 | 0.1586005 | 0.410798  | 0.86 | 0.2998789 | 0.5372029 | 0.77 | 0.0883024 | 0.5363373 | 0.93 | 0.5952978 | 0.5952978 |
| phe*                  | 1.68 | 0.0011269 | 0.0077007 | 1.6  | 0.0044457 | 0.0280418 | 1.21 | 0.2285388 | 0.4461947 | 1.22 | 0.200731  | 0.473351  | 1.18 | 0.3031179 | 0.710162  | 1.47 | 0.0148428 | 0.0148428 |
| tyr*                  | 1.58 | 0.0012623 | 0.0079619 | 1.58 | 0.002132  | 0.0194252 | 1.16 | 0.2862378 | 0.4835096 | 1.19 | 0.2018545 | 0.473351  | 1.08 | 0.5958743 | 0.7965831 | 1.5  | 0.0044179 | 0.0044179 |
| mucate*               | 0.63 | 0.0016945 | 0.009925  | 0.68 | 0.0132124 | 0.0601899 | 0.73 | 0.0329516 | 0.1715092 | 0.75 | 0.0549608 | 0.2371993 | 0.68 | 0.0143787 | 0.2155525 | 0.73 | 0.0282704 | 0.0282704 |
| gly*                  | 0.62 | 0.0020735 | 0.0113349 | 0.84 | 0.2718633 | 0.6064603 | 0.76 | 0.0788476 | 0.3109306 | 0.73 | 0.0424434 | 0.2047268 | 0.98 | 0.9060251 | 0.9393345 | 0.83 | 0.2323897 | 0.2323897 |
| pyruvate*             | 1.56 | 0.0031396 | 0.0160902 | 1.11 | 0.5097395 | 0.7759641 | 1.37 | 0.0334652 | 0.1715092 | 1.34 | 0.0485864 | 0.2213379 | 0.97 | 0.8235833 | 0.9126193 | 1.43 | 0.0174971 | 0.0174971 |
| ala*                  | 1.54 | 0.0034875 | 0.0168221 | 1.48 | 0.0099412 | 0.0479517 | 1.22 | 0.1753406 | 0.410798  | 1.14 | 0.3609941 | 0.56631   | 1.02 | 0.8976611 | 0.9393345 | 2.02 | 6.1e-06   | 6.1e-06   |
| trp*                  | 1.54 | 0.0051928 | 0.0224109 | 1.24 | 0.1799602 | 0.4471737 | 1.3  | 0.0869051 | 0.3109306 | 1.21 | 0.2106268 | 0.473351  | 0.93 | 0.6605811 | 0.7965831 | 1.3  | 0.0852344 | 0.0852344 |
| hydroxybutyrate_3*    | 0.63 | 0.0049855 | 0.0224109 | 0.58 | 0.0017653 | 0.0180942 | 0.72 | 0.0448524 | 0.1935733 | 0.74 | 0.07349   | 0.2896793 | 1.12 | 0.5179321 | 0.7955428 | 0.91 | 0.5417691 | 0.5417691 |
| gln*                  | 0.68 | 0.0069432 | 0.028467  | 0.57 | 0.0002324 | 0.0038113 | 0.82 | 0.1714416 | 0.410798  | 0.86 | 0.3070353 | 0.5372029 | 0.59 | 0.0007524 | 0.0616957 | 1.15 | 0.327812  | 0.327812  |
| hydroxybutyrate_2*    | 1.47 | 0.008098  | 0.0316206 | 1.12 | 0.4340137 | 0.7660635 | 1.23 | 0.1544986 | 0.410798  | 1.2  | 0.2036996 | 0.473351  | 1.24 | 0.1664998 | 0.6501421 | 1.68 | 0.0005421 | 0.0005421 |
| asn                   | 0.68 | 0.0089233 | 0.0332596 | 0.54 | 0.0001241 | 0.0033918 | 0.77 | 0.0799759 | 0.3109306 | 0.83 | 0.1987067 | 0.473351  | 0.82 | 0.212337  | 0.6529865 | 1.04 | 0.7734048 | 0.7734048 |
| thr                   | 1.45 | 0.0129747 | 0.0462577 | 1.1  | 0.5315095 | 0.7759641 | 1.46 | 0.0126887 | 0.1521035 | 1.45 | 0.0141369 | 0.1288027 | 1.13 | 0.4229692 | 0.7955428 | 1.46 | 0.011456  | 0.011456  |

|                    |          |               |               |          |               |               |      |               |               |      |               |               |          |               |               |      |               |               |
|--------------------|----------|---------------|---------------|----------|---------------|---------------|------|---------------|---------------|------|---------------|---------------|----------|---------------|---------------|------|---------------|---------------|
| urate              | 1.4<br>4 | 0.0174<br>327 | 0.0580<br>84  | 1.<br>36 | 0.0527<br>962 | 0.1882<br>299 | 1.22 | 0.2046<br>739 | 0.4329<br>051 | 1.15 | 0.3660<br>297 | 0.5663<br>1   | 1.<br>56 | 0.0076<br>06  | 0.2078<br>984 | 1.08 | 0.5954<br>561 | 0.5954<br>561 |
| cysteinessulfate*  | 1.8<br>3 | 0.0177<br>085 | 0.0580<br>84  | 0.<br>86 | 0.5789<br>34  | 0.7824<br>992 | 1.26 | 0.3591<br>814 | 0.5367<br>759 | 1.27 | 0.3537<br>936 | 0.5663<br>1   | 1.<br>89 | 0.0165<br>329 | 0.2155<br>525 | 1.75 | 0.0307<br>675 | 0.0307<br>675 |
| prolinebetaine     | 0.7      | 0.0212<br>539 | 0.0630<br>499 | 1.<br>09 | 0.5707<br>265 | 0.7824<br>992 | 0.79 | 0.1277<br>533 | 0.3879<br>914 | 0.84 | 0.2650<br>465 | 0.5054<br>375 | 0.<br>87 | 0.3974<br>712 | 0.7760<br>152 | 0.81 | 0.1692<br>083 | 0.1692<br>083 |
| triethanolamine    | 0.7<br>7 | 0.0221<br>79  | 0.0630<br>499 | 1.<br>05 | 0.6478<br>534 | 0.8172<br>92  | 0.94 | 0.6058<br>729 | 0.7306<br>114 | 0.89 | 0.3144<br>603 | 0.5372<br>029 | 0.<br>82 | 0.0968<br>018 | 0.5363<br>373 | 0.83 | 0.0955<br>76  | 0.0955<br>76  |
| uridine            | 0.7<br>2 | 0.0222<br>981 | 0.0630<br>499 | 0.<br>93 | 0.6421<br>73  | 0.8172<br>92  | 0.92 | 0.5526<br>931 | 0.6866<br>794 | 0.94 | 0.6653<br>13  | 0.8183<br>695 | 0.<br>75 | 0.0622<br>86  | 0.4805<br>872 | 0.79 | 0.1019<br>285 | 0.1019<br>285 |
| citrate            | 0.7<br>1 | 0.0205<br>214 | 0.0630<br>499 | 0.<br>71 | 0.0243<br>504 | 0.0998<br>366 | 0.82 | 0.1810<br>762 | 0.4124<br>513 | 0.85 | 0.2778<br>094 | 0.5177<br>357 | 0.<br>91 | 0.5252<br>775 | 0.7955<br>428 | 0.95 | 0.7314<br>813 | 0.7314<br>813 |
| carnitine          | 1.3<br>5 | 0.0461<br>792 | 0.1214<br>05  | 1        | 0.9911<br>762 | 0.9911<br>762 | 1.19 | 0.2399<br>018 | 0.4574<br>871 | 1.24 | 0.1510<br>688 | 0.4273<br>85  | 1.<br>18 | 0.2939<br>818 | 0.7090<br>15  | 1.35 | 0.0481<br>012 | 0.0481<br>012 |
| adma               | 0.7<br>5 | 0.0473<br>776 | 0.1214<br>05  | 1.<br>1  | 0.5393<br>897 | 0.7759<br>641 | 0.64 | 0.0025<br>512 | 0.0523<br>002 | 0.66 | 0.0053<br>362 | 0.1093<br>93  | 1.<br>14 | 0.3758<br>007 | 0.7703<br>915 | 0.78 | 0.0908<br>805 | 0.0908<br>805 |
| glycerophosphate   | 1.3<br>4 | 0.0451<br>787 | 0.1214<br>05  | 1.<br>11 | 0.5082<br>818 | 0.7759<br>641 | 1.4  | 0.0241<br>14  | 0.1521<br>035 | 1.47 | 0.0101<br>747 | 0.1203<br>674 | 0.<br>91 | 0.5643<br>689 | 0.7965<br>831 | 0.81 | 0.1526<br>047 | 0.1526<br>047 |
| sdma               | 0.7<br>4 | 0.0496<br>853 | 0.1234<br>604 | 0.<br>99 | 0.9319<br>432 | 0.9911<br>762 | 0.64 | 0.0049<br>022 | 0.0803<br>966 | 0.66 | 0.0072<br>6   | 0.1190<br>645 | 1.<br>15 | 0.3944<br>782 | 0.7760<br>152 | 0.9  | 0.5059<br>398 | 0.5059<br>398 |
| aminoisobutyrate   | 0.7<br>3 | 0.0559<br>722 | 0.1345<br>154 | 0.<br>82 | 0.2488<br>58  | 0.5830<br>388 | 0.69 | 0.0217<br>785 | 0.1521<br>035 | 0.72 | 0.0415<br>746 | 0.2047<br>268 | 1.<br>11 | 0.5392<br>058 | 0.7955<br>428 | 1.15 | 0.3744<br>813 | 0.3744<br>813 |
| lactate            | 1.3<br>1 | 0.0574<br>151 | 0.1345<br>154 | 1.<br>12 | 0.4278<br>293 | 0.7660<br>635 | 1.1  | 0.4815<br>122 | 0.6580<br>667 | 1.06 | 0.6776<br>797 | 0.8183<br>695 | 1.<br>05 | 0.7417<br>225 | 0.8814<br>674 | 1.38 | 0.0215<br>201 | 0.0215<br>201 |
| met                | 1.2<br>8 | 0.0595<br>983 | 0.1357<br>517 | 1.<br>07 | 0.6249<br>433 | 0.8134<br>183 | 1.32 | 0.0365<br>542 | 0.1754<br>279 | 1.34 | 0.0294<br>718 | 0.1726<br>206 | 1.<br>17 | 0.2532<br>883 | 0.6565<br>113 | 1.17 | 0.2290<br>191 | 0.2290<br>191 |
| betaine            | 0.7<br>9 | 0.0773<br>941 | 0.1586<br>579 | 0.<br>65 | 0.0023<br>74  | 0.0194<br>67  | 0.88 | 0.3321<br>02  | 0.5236<br>994 | 0.99 | 0.9157<br>725 | 0.9503<br>276 | 0.<br>84 | 0.2150<br>077 | 0.6529<br>865 | 0.8  | 0.0892<br>224 | 0.0892<br>224 |
| cisaconitate       | 1.2<br>8 | 0.0739<br>981 | 0.1586<br>579 | 1.<br>13 | 0.3869<br>715 | 0.7660<br>635 | 1.27 | 0.0872<br>122 | 0.3109<br>306 | 1.27 | 0.0940<br>258 | 0.3409<br>117 | 1.<br>25 | 0.1288<br>616 | 0.5805<br>87  | 1.13 | 0.3734<br>307 | 0.3734<br>307 |
| hippurate          | 0.8<br>1 | 0.0720<br>623 | 0.1586<br>579 | 1        | 0.9776<br>216 | 0.9911<br>762 | 0.85 | 0.1531<br>512 | 0.4107<br>98  | 0.83 | 0.1222<br>08  | 0.3854<br>254 | 0.<br>89 | 0.3424<br>455 | 0.7658<br>734 | 1.07 | 0.5495<br>81  | 0.5495<br>81  |
| glucuronate        | 1.3<br>3 | 0.0768<br>715 | 0.1586<br>579 | 1.<br>17 | 0.3551<br>476 | 0.7467<br>207 | 1.2  | 0.2508<br>639 | 0.4675<br>192 | 1.25 | 0.1662<br>079 | 0.4543<br>016 | 1.<br>17 | 0.3706<br>39  | 0.7703<br>915 | 1.14 | 0.3982<br>58  | 0.3982<br>58  |
| methylnicotinamide | 1.3<br>1 | 0.0800<br>288 | 0.1600<br>576 | 0.<br>99 | 0.9457<br>674 | 0.9911<br>762 | 1.48 | 0.0144<br>727 | 0.1521<br>035 | 1.41 | 0.0319<br>797 | 0.1748<br>225 | 0.<br>82 | 0.2390<br>243 | 0.6565<br>113 | 1.19 | 0.2718<br>949 | 0.2718<br>949 |
| ornithine          | 1.2<br>4 | 0.1395<br>647 | 0.2661<br>466 | 0.<br>89 | 0.4499<br>981 | 0.7660<br>635 | 1.06 | 0.6950<br>794 | 0.7818<br>402 | 1.05 | 0.7544<br>186 | 0.8713<br>004 | 1.<br>12 | 0.4724<br>27  | 0.7955<br>428 | 1.26 | 0.1128<br>519 | 0.1128<br>519 |
| glutarate          | 0.8      | 0.1364<br>265 | 0.2661<br>466 | 0.<br>91 | 0.5223<br>07  | 0.7759<br>641 | 0.85 | 0.2635<br>365 | 0.4724<br>917 | 0.87 | 0.3442<br>446 | 0.5663<br>1   | 1.<br>31 | 0.0981<br>105 | 0.5363<br>373 | 0.77 | 0.0853<br>337 | 0.0853<br>337 |
| succinate          | 0.8<br>1 | 0.1495<br>503 | 0.2725<br>138 | 0.<br>65 | 0.0058<br>324 | 0.0318<br>839 | 0.79 | 0.1111<br>008 | 0.3644<br>106 | 0.81 | 0.1511<br>483 | 0.4273<br>85  | 1.<br>1  | 0.5316<br>28  | 0.7955<br>428 | 1.08 | 0.6000<br>067 | 0.6000<br>067 |

|                              |          |               |               |          |               |               |      |               |               |      |               |               |          |               |               |      |               |               |
|------------------------------|----------|---------------|---------------|----------|---------------|---------------|------|---------------|---------------|------|---------------|---------------|----------|---------------|---------------|------|---------------|---------------|
| octanoate                    | 1.2<br>2 | 0.1473<br>623 | 0.2725<br>138 | 0.<br>92 | 0.5821<br>031 | 0.7824<br>992 | 1.19 | 0.2279<br>067 | 0.4461<br>947 | 1.25 | 0.1143<br>541 | 0.3799<br>426 | 1.<br>25 | 0.1345<br>263 | 0.5805<br>87  | 0.91 | 0.5063<br>182 | 0.5063<br>182 |
| decanoate                    | 0.8<br>3 | 0.1700<br>207 | 0.3030<br>803 | 0.<br>93 | 0.6060<br>519 | 0.8015<br>525 | 0.88 | 0.3555<br>001 | 0.5367<br>759 | 0.97 | 0.8284<br>267 | 0.9179<br>864 | 0.<br>83 | 0.1795<br>223 | 0.6519<br>156 | 0.86 | 0.2605<br>65  | 0.2605<br>65  |
| gammabutyrobet<br>aine       | 0.8<br>3 | 0.1776<br>584 | 0.3099<br>573 | 0.<br>85 | 0.2740<br>942 | 0.6064<br>603 | 0.9  | 0.4525<br>014 | 0.6289<br>002 | 0.94 | 0.6786<br>479 | 0.8183<br>695 | 1.<br>02 | 0.8829<br>051 | 0.9393<br>345 | 0.98 | 0.8677<br>063 | 0.8677<br>063 |
| acetylbutyrate               | 0.8<br>2 | 0.1960<br>622 | 0.3349<br>396 | 0.<br>82 | 0.2280<br>041 | 0.5498<br>921 | 0.97 | 0.8587<br>368 | 0.9144<br>99  | 1.02 | 0.8806<br>175 | 0.9375<br>862 | 0.<br>64 | 0.0124<br>975 | 0.2155<br>525 | 0.82 | 0.1978<br>237 | 0.1978<br>237 |
| pelargonate                  | 1.1<br>9 | 0.2144<br>333 | 0.3588<br>476 | 0.<br>89 | 0.4114<br>029 | 0.7660<br>635 | 1.23 | 0.1350<br>208 | 0.3954<br>18  | 1.28 | 0.0741<br>862 | 0.2896<br>793 | 1.<br>07 | 0.6567<br>161 | 0.7965<br>831 | 0.83 | 0.1821<br>511 | 0.1821<br>511 |
| creatine                     | 1.2      | 0.2278<br>991 | 0.3737<br>545 | 1.<br>38 | 0.0436<br>623 | 0.1627<br>412 | 1.19 | 0.2681<br>093 | 0.4724<br>917 | 1.09 | 0.5654<br>735 | 0.7824<br>659 | 1.<br>13 | 0.4423<br>641 | 0.7955<br>428 | 1.2  | 0.2368<br>445 | 0.2368<br>445 |
| indoxylsulfate               | 0.8<br>5 | 0.2690<br>288 | 0.4325<br>561 | 0.<br>95 | 0.7521<br>339 | 0.8810<br>711 | 0.94 | 0.6646<br>373 | 0.7785<br>751 | 0.98 | 0.8648<br>404 | 0.9331<br>173 | 0.<br>75 | 0.0703<br>298 | 0.4805<br>872 | 0.8  | 0.1242<br>113 | 0.1242<br>113 |
| choline                      | 1.1<br>6 | 0.2793<br>438 | 0.4403<br>224 | 1.<br>22 | 0.1733<br>961 | 0.4443<br>276 | 0.99 | 0.9498<br>135 | 0.9615<br>396 | 0.94 | 0.6703<br>177 | 0.8183<br>695 | 1.<br>25 | 0.1292<br>761 | 0.5805<br>87  | 0.94 | 0.6612<br>479 | 0.6612<br>479 |
| citrulline                   | 1.1<br>8 | 0.2845<br>986 | 0.4403<br>224 | 0.<br>68 | 0.0186<br>879 | 0.0806<br>531 | 1.23 | 0.1730<br>837 | 0.4107<br>98  | 1.12 | 0.4539<br>934 | 0.6647<br>761 | 1.<br>28 | 0.1262<br>499 | 0.5805<br>87  | 1.11 | 0.4929<br>111 | 0.4929<br>111 |
| betaala                      | 0.8<br>6 | 0.3079<br>657 | 0.4676<br>516 | 0.<br>89 | 0.4479<br>453 | 0.7660<br>635 | 0.82 | 0.1741<br>932 | 0.4107<br>98  | 0.86 | 0.3135<br>676 | 0.5372<br>029 | 1.<br>01 | 0.9490<br>862 | 0.9608<br>033 | 1.04 | 0.7807<br>742 | 0.7807<br>742 |
| isocitrate                   | 1.1<br>5 | 0.3148<br>445 | 0.4694<br>046 | 1.<br>12 | 0.4572<br>378 | 0.7660<br>635 | 1.25 | 0.1214<br>618 | 0.3830<br>718 | 1.25 | 0.1158<br>362 | 0.3799<br>426 | 1.<br>07 | 0.6498<br>757 | 0.7965<br>831 | 1.01 | 0.9309<br>997 | 0.9309<br>997 |
| trimethylaminen<br>oxide     | 0.8<br>7 | 0.3323<br>168 | 0.4729<br>082 | 0.<br>95 | 0.7082<br>42  | 0.8416<br>788 | 0.83 | 0.1947<br>244 | 0.4315<br>515 | 0.89 | 0.4287<br>676 | 0.6392<br>535 | 0.<br>89 | 0.4560<br>426 | 0.7955<br>428 | 1.1  | 0.4823<br>714 | 0.4823<br>714 |
| creatinine                   | 0.8<br>7 | 0.3303<br>393 | 0.4729<br>082 | 0.<br>9  | 0.4689<br>294 | 0.7690<br>442 | 0.84 | 0.2058<br>939 | 0.4329<br>051 | 0.84 | 0.2135<br>852 | 0.4733<br>51  | 1.<br>22 | 0.1864<br>073 | 0.6519<br>156 | 0.87 | 0.3043<br>177 | 0.3043<br>177 |
| nacetylaspatae               | 0.8<br>7 | 0.3344<br>96  | 0.4729<br>082 | 0.<br>99 | 0.9720<br>272 | 0.9911<br>762 | 0.84 | 0.2201<br>743 | 0.4461<br>947 | 0.88 | 0.3547<br>116 | 0.5663<br>1   | 1<br>7   | 0.9828<br>7   | 0.9828<br>7   | 0.86 | 0.3020<br>32  | 0.3020<br>32  |
| arg                          | 1.1<br>5 | 0.3637<br>682 | 0.5055<br>761 | 0.<br>79 | 0.1285<br>948 | 0.3646<br>025 | 1.02 | 0.8808<br>766 | 0.9215<br>565 | 1.03 | 0.8475<br>894 | 0.9266<br>978 | 1.<br>09 | 0.5772<br>512 | 0.7965<br>831 | 1.25 | 0.1406<br>842 | 0.1406<br>842 |
| glycerophosphor<br>ylcholine | 1.1<br>2 | 0.4426<br>235 | 0.6049<br>188 | 0.<br>97 | 0.8460<br>786 | 0.9465<br>876 | 1.06 | 0.6922<br>031 | 0.7818<br>402 | 0.95 | 0.7232<br>448 | 0.8595<br>083 | 1.<br>08 | 0.6247<br>433 | 0.7965<br>831 | 0.97 | 0.8544<br>048 | 0.8544<br>048 |
| ab                           | 0.9      | 0.4656<br>864 | 0.6260<br>046 | 1.<br>07 | 0.6656<br>047 | 0.8269<br>634 | 0.89 | 0.4178<br>346 | 0.5907<br>317 | 0.84 | 0.2257<br>805 | 0.4776<br>082 | 1.<br>04 | 0.7934<br>621 | 0.8912<br>861 | 1.45 | 0.0125<br>23  | 0.0125<br>23  |
| taurine                      | 1.1<br>1 | 0.4835<br>289 | 0.6395<br>06  | 1.<br>4  | 0.0335<br>145 | 0.1308<br>661 | 1.11 | 0.4975<br>806 | 0.6688<br>788 | 1.28 | 0.0956<br>216 | 0.3409<br>117 | 1.<br>2  | 0.2535<br>144 | 0.6565<br>113 | 1    | 0.9935<br>829 | 0.9935<br>829 |
| indole3acetate               | 0.8<br>9 | 0.4996<br>055 | 0.6502<br>802 | 0.<br>93 | 0.6983<br>949 | 0.8416<br>788 | 0.83 | 0.2889<br>265 | 0.4835<br>096 | 0.86 | 0.3733<br>264 | 0.5669<br>031 | 1.<br>1  | 0.6123<br>061 | 0.7965<br>831 | 0.91 | 0.5941<br>037 | 0.5941<br>037 |
| kynurenine                   | 1.1<br>3 | 0.5157<br>791 | 0.6607<br>791 | 1.<br>26 | 0.1289<br>448 | 0.3646<br>025 | 0.96 | 0.7945<br>268 | 0.8804<br>216 | 0.99 | 0.9520<br>254 | 0.9520<br>254 | 1.<br>19 | 0.2671<br>543 | 0.6638<br>38  | 0.9  | 0.4763<br>998 | 0.4763<br>998 |
| nndimethylglycin<br>e        | 1.0<br>9 | 0.5455<br>01  | 0.6881<br>705 | 0.<br>96 | 0.7954<br>375 | 0.9186<br>743 | 1.02 | 0.8923<br>694 | 0.9215<br>565 | 1.08 | 0.6040<br>413 | 0.8119<br>899 | 1.<br>34 | 0.0653<br>152 | 0.4805<br>872 | 0.89 | 0.3998<br>201 | 0.3998<br>201 |

|                  |          |               |               |          |               |               |      |               |               |      |               |               |          |               |               |      |               |               |
|------------------|----------|---------------|---------------|----------|---------------|---------------|------|---------------|---------------|------|---------------|---------------|----------|---------------|---------------|------|---------------|---------------|
| pipecolate       | 1.0<br>8 | 0.6140<br>143 | 0.7628<br>662 | 0.<br>9  | 0.5102<br>93  | 0.7759<br>641 | 0.85 | 0.3039<br>687 | 0.4985<br>086 | 0.81 | 0.1923<br>184 | 0.4733<br>51  | 0.<br>96 | 0.7920<br>658 | 0.8912<br>861 | 1.64 | 0.0018<br>842 | 0.0018<br>842 |
| his              | 0.9<br>4 | 0.6612<br>056 | 0.7973<br>362 | 1.<br>1  | 0.5570<br>741 | 0.7824<br>992 | 1.03 | 0.8312<br>722 | 0.8992<br>321 | 1.04 | 0.7791<br>827 | 0.8874<br>025 | 0.<br>9  | 0.5378<br>627 | 0.7955<br>428 | 1.12 | 0.4456<br>446 | 0.4456<br>446 |
| terephthalate    | 0.9<br>4 | 0.6599<br>335 | 0.7973<br>362 | 1.<br>03 | 0.8369<br>681 | 0.9465<br>876 | 0.92 | 0.5841<br>224 | 0.7148<br>961 | 0.9  | 0.4979<br>799 | 0.7163<br>922 | 0.<br>82 | 0.1987<br>548 | 0.6519<br>156 | 0.97 | 0.8602<br>39  | 0.8602<br>39  |
| oxoproline       | 1.0<br>6 | 0.6922<br>456 | 0.8226<br>686 | 0.<br>85 | 0.2810<br>426 | 0.6064<br>603 | 0.98 | 0.8990<br>795 | 0.9215<br>565 | 1.07 | 0.6286<br>911 | 0.8183<br>695 | 1.<br>02 | 0.8778<br>815 | 0.9393<br>345 | 1.17 | 0.2918<br>117 | 0.2918<br>117 |
| hydroxyproline   | 0.9<br>5 | 0.7023<br>095 | 0.8227<br>054 | 1.<br>03 | 0.8542<br>376 | 0.9465<br>876 | 0.86 | 0.2708<br>184 | 0.4724<br>917 | 0.84 | 0.2271<br>551 | 0.4776<br>082 | 1.<br>03 | 0.8421<br>232 | 0.9207<br>213 | 1.06 | 0.6700<br>828 | 0.6700<br>828 |
| sarcosine        | 0.9<br>5 | 0.7159<br>151 | 0.8268<br>315 | 1.<br>12 | 0.4572<br>662 | 0.7660<br>635 | 0.87 | 0.3600<br>326 | 0.5367<br>759 | 0.84 | 0.2462<br>368 | 0.4992<br>152 | 0.<br>89 | 0.4497<br>792 | 0.7955<br>428 | 0.92 | 0.5577<br>78  | 0.5577<br>78  |
| hexanoate        | 1.0<br>4 | 0.7736<br>717 | 0.8811<br>261 | 1.<br>1  | 0.5335<br>672 | 0.7759<br>641 | 0.93 | 0.6331<br>281 | 0.7524<br>131 | 1.07 | 0.6590<br>743 | 0.8183<br>695 | 0.<br>93 | 0.6491<br>279 | 0.7965<br>831 | 0.89 | 0.4341<br>362 | 0.4341<br>362 |
| asp              | 0.9<br>7 | 0.7956<br>401 | 0.8816<br>552 | 1.<br>06 | 0.6944<br>881 | 0.8416<br>788 | 0.97 | 0.8334<br>346 | 0.8992<br>321 | 0.98 | 0.8918<br>503 | 0.9375<br>862 | 0.<br>96 | 0.7896<br>269 | 0.8912<br>861 | 0.97 | 0.8244<br>624 | 0.8244<br>624 |
| lys              | 0.9<br>6 | 0.7945<br>898 | 0.8816<br>552 | 1        | 0.9777<br>964 | 0.9911<br>762 | 1.09 | 0.5418<br>318 | 0.6835<br>417 | 1.03 | 0.8218<br>618 | 0.9179<br>864 | 0.<br>87 | 0.3679<br>591 | 0.7703<br>915 | 1.01 | 0.9482<br>039 | 0.9482<br>039 |
| oacetylcarnitine | 0.9<br>7 | 0.8592<br>317 | 0.9369<br>547 | 1        | 0.9885<br>491 | 0.9911<br>762 | 1.1  | 0.5285<br>789 | 0.6772<br>417 | 1.01 | 0.9458<br>554 | 0.9520<br>254 | 1.<br>09 | 0.5813<br>929 | 0.7965<br>831 | 1.12 | 0.4413<br>625 | 0.4413<br>625 |
| fumarate         | 1.0<br>2 | 0.8699<br>846 | 0.9369<br>547 | 0.<br>67 | 0.0077<br>907 | 0.0399<br>272 | 1    | 0.9981<br>365 | 0.9981<br>365 | 0.99 | 0.9271<br>488 | 0.9503<br>276 | 0.<br>83 | 0.2325<br>589 | 0.6565<br>113 | 1.05 | 0.7535<br>601 | 0.7535<br>601 |
| threonate        | 0.9<br>8 | 0.8915<br>702 | 0.9369<br>547 | 0.<br>8  | 0.1397<br>051 | 0.3818<br>605 | 0.91 | 0.5230<br>785 | 0.6772<br>417 | 0.94 | 0.6583<br>988 | 0.8183<br>695 | 1.<br>02 | 0.9164<br>239 | 0.9393<br>345 | 0.93 | 0.5933<br>973 | 0.5933<br>973 |
| oxoglutarate     | 1.0<br>2 | 0.8836<br>604 | 0.9369<br>547 | 0.<br>76 | 0.0766<br>163 | 0.2513<br>014 | 1.06 | 0.6960<br>285 | 0.7818<br>402 | 1.1  | 0.5138<br>666 | 0.7265<br>011 | 1.<br>1  | 0.5432<br>975 | 0.7955<br>428 | 0.87 | 0.3314<br>362 | 0.3314<br>362 |
| azelate          | 1.0<br>2 | 0.9026<br>758 | 0.9369<br>547 | 0.<br>98 | 0.8778<br>428 | 0.9597<br>748 | 0.91 | 0.5119<br>104 | 0.6770<br>428 | 0.92 | 0.5725<br>36  | 0.7824<br>659 | 1.<br>08 | 0.5984<br>752 | 0.7965<br>831 | 0.99 | 0.9207<br>48  | 0.9207<br>48  |
| malate           | 0.9<br>9 | 0.9442<br>143 | 0.9678<br>196 | 0.<br>89 | 0.4438<br>156 | 0.7660<br>635 | 0.87 | 0.3151<br>804 | 0.5067<br>606 | 0.85 | 0.2625<br>838 | 0.5054<br>375 | 1.<br>1  | 0.5252<br>199 | 0.7955<br>428 | 1.39 | 0.0247<br>182 | 0.0247<br>182 |
| guanidinoacetate | 1        | 0.9914<br>451 | 0.9914<br>451 | 0.<br>89 | 0.4577<br>696 | 0.7660<br>635 | 1.14 | 0.3808<br>266 | 0.5576<br>389 | 1.05 | 0.7343<br>089 | 0.8601<br>904 | 1.<br>24 | 0.1632<br>284 | 0.6501<br>421 | 0.96 | 0.7977<br>798 | 0.7977<br>798 |
| methylhistidine  | 1        | 0.9831<br>753 | 0.9914<br>451 | 0.<br>77 | 0.0887<br>015 | 0.2693<br>896 | 0.88 | 0.3942<br>864 | 0.5672<br>191 | 0.84 | 0.2496<br>076 | 0.4992<br>152 | 1.<br>47 | 0.0184<br>008 | 0.2155<br>525 | 1.07 | 0.6222<br>803 | 0.6222<br>803 |

\* Indicates metabolite among top 25 highest ranked metabolites in original and sex-stratified models.



Supplementary Table 6a. Counts of imputed values by cohort. Columns indicated the number of values which were imputed for each metabolite in each cohort.

| <b>Metabolite</b>    | <b>BLSA</b> | <b>TMCS</b> |
|----------------------|-------------|-------------|
| gly                  | 0           | 0           |
| trimethylaminenoxide | 0           | 0           |
| betaala              | 0           | 4           |
| ala                  | 0           | 0           |
| sarcosine            | 0           | 43          |
| aminoisobutyrate     | 0           | 15          |
| ab                   | 0           | 0           |
| nndimethylglycine    | 0           | 0           |
| choline              | 0           | 0           |
| ser                  | 0           | 0           |
| creatinine           | 0           | 0           |
| pro                  | 0           | 0           |
| guanidinoacetate     | 0           | 1           |
| val                  | 0           | 0           |
| betaine              | 0           | 0           |
| thr                  | 0           | 0           |
| taurine              | 0           | 0           |
| pipecolate           | 0           | 3           |
| hydroxyproline       | 0           | 0           |
| creatine             | 0           | 0           |
| ile                  | 0           | 0           |
| leu                  | 0           | 0           |
| asn                  | 0           | 0           |
| ornithine            | 0           | 0           |
| asp                  | 0           | 11          |

|                          |    |     |
|--------------------------|----|-----|
| methylnicotinamide       | 5  | 89  |
| prolinebetaine           | 1  | 8   |
| gammabutyrobetaine       | 0  | 0   |
| gln                      | 0  | 0   |
| lys                      | 0  | 0   |
| glu                      | 0  | 0   |
| met                      | 0  | 0   |
| triethanolamine          | 35 | 125 |
| his                      | 0  | 0   |
| alphaaminoadipate        | 1  | 18  |
| carnitine                | 0  | 0   |
| phe                      | 0  | 0   |
| methylhistidine          | 0  | 0   |
| arg                      | 0  | 0   |
| guanidinosuccinate       | 19 | 113 |
| indole3acetate           | 3  | 28  |
| citrulline               | 0  | 0   |
| tyr                      | 0  | 0   |
| sdma                     | 0  | 62  |
| adma                     | 0  | 54  |
| oacetylcarnitine         | 36 | 47  |
| trp                      | 0  | 0   |
| kynurenine               | 0  | 21  |
| cystine                  | 0  | 0   |
| uridine                  | 0  | 1   |
| glycerophosphorylcholine | 0  | 0   |
| pyruvate                 | 3  | 0   |
| lactate                  | 0  | 0   |
| hydroxybutyrate_2        | 0  | 0   |
| hydroxybutyrate_3        | 0  | 0   |

|                      |    |     |
|----------------------|----|-----|
| fumarate             | 1  | 41  |
| oxoisopentanoate     | 1  | 0   |
| hexanoate            | 4  | 4   |
| succinate            | 0  | 0   |
| oxoproline           | 0  | 0   |
| methyl2oxopentanoate | 0  | 0   |
| acetylbutyrate       | 17 | 113 |
| glutarate            | 54 | 10  |
| malate               | 0  | 0   |
| threonate            | 0  | 0   |
| octanoate            | 30 | 25  |
| oxoglutarate         | 27 | 2   |
| pelargonate          | 2  | 0   |
| terephthalate        | 10 | 21  |
| urate                | 0  | 0   |
| glycerophosphate     | 10 | 34  |
| decanoate            | 0  | 34  |
| cisacconitate        | 0  | 0   |
| nacetylaspartate     | 3  | 3   |
| hippurate            | 13 | 136 |
| azelate              | 0  | 4   |
| isocitrate           | 0  | 2   |
| citrate              | 0  | 0   |
| glucuronate          | 5  | 54  |
| cysteinessulfate     | 13 | 174 |
| mucate               | 0  | 0   |
| indoxylsulfate       | 2  | 17  |

Supplementary Table 6b. Sensitivity analysis excluding imputed values for BLSA. The results shown represent logistic regression analysis with covariates of sex and age, as in the original analysis, with imputed values removed from analysis. \* indicates that a

metabolite among the top 25 ranked metabolites in this analysis was also present among the top 25 highest ranked metabolites for BLSA in the original analysis.

| Metabolites        | MetS OR | MetS p-value | MetS FDR p-value | WC OR | WC p-value | WC FDR p-value | TG OR | TG p-value | TG FDR p-value | HDL OR | HDL p-value | HDL FDR p-value | BP OR | BP p-value | BP FDR p-value | Glucose OR | Glucose p-value | Glucose FDR p-value |
|--------------------|---------|--------------|------------------|-------|------------|----------------|-------|------------|----------------|--------|-------------|-----------------|-------|------------|----------------|------------|-----------------|---------------------|
| urate*             | 2.86    | 1.55e-05     | 0.0012749        | 3.12  | 6.8e-06    | 0.0002781      | 1.79  | 0.0121316  | 0.110532       | 1.46   | 0.0835315   | 0.3542164       | 1.46  | 0.1016421  | 0.5953325      | 2.57       | 0.0001303       | 0.0001303           |
| alphaaminoadipate* | 2.48    | 4.06e-05     | 0.0016659        | 2.04  | 0.0010448  | 0.0154273      | 1.8   | 0.0068657  | 0.0703738      | 1.41   | 0.0836582   | 0.3542164       | 1.58  | 0.0278568  | 0.2855326      | 2.46       | 7.36e-05        | 7.36e-05            |
| oxoglutarate*      | 2.18    | 0.0002003    | 0.0043297        | 1.89  | 0.0017471  | 0.0182641      | 2.01  | 0.0012834  | 0.0350804      | 1.98   | 0.0009175   | 0.0590666       | 1.21  | 0.3401824  | 0.807095       | 1.67       | 0.0113463       | 0.0113463           |
| phe*               | 2.03    | 0.0002112    | 0.0043297        | 1.65  | 0.0063231  | 0.0345665      | 1.82  | 0.0020797  | 0.0426343      | 1.71   | 0.0034914   | 0.095431        | 1.24  | 0.2353416  | 0.72028        | 1.26       | 0.1859604       | 0.1859604           |
| glu*               | 2.24    | 0.0003067    | 0.004775         | 2.3   | 0.000298   | 0.0081459      | 1.63  | 0.0248187  | 0.1356754      | 1.98   | 0.0014406   | 0.0590666       | 1.18  | 0.4472154  | 0.8994552      | 1.62       | 0.024978        | 0.024978            |
| glucuronate*       | 2.02    | 0.0003494    | 0.004775         | 1.45  | 0.0483555  | 0.158606       | 1.76  | 0.0042913  | 0.0586482      | 1.34   | 0.1064271   | 0.3542164       | 1.48  | 0.0434141  | 0.3955502      | 1.65       | 0.0096971       | 0.0096971           |
| hydroxybutyrate_2* | 1.96    | 0.0004903    | 0.0057433        | 1.92  | 0.0008692  | 0.0154273      | 1.45  | 0.0507587  | 0.209999       | 1.45   | 0.0419114   | 0.2863942       | 1.6   | 0.0147153  | 0.2855326      | 2.18       | 0.0001256       | 0.0001256           |
| cystine*           | 2.11    | 0.0008149    | 0.0083527        | 2.15  | 0.0011288  | 0.0154273      | 2.12  | 0.0011757  | 0.0350804      | 1.76   | 0.0063302   | 0.1203858       | 1.64  | 0.0219236  | 0.2855326      | 1.15       | 0.4951075       | 0.4951075           |
| methylxanthanoate* | 2.05    | 0.0015337    | 0.0135009        | 2.01  | 0.0024752  | 0.0184518      | 1.75  | 0.0152324  | 0.1135504      | 1.57   | 0.038201    | 0.2847711       | 1.48  | 0.0820901  | 0.5177988      | 2.5        | 0.0001543       | 0.0001543           |
| asn*               | 0.56    | 0.0016465    | 0.0135009        | 0.57  | 0.0020046  | 0.0182641      | 0.71  | 0.0599085  | 0.2339284      | 0.76   | 0.1164713   | 0.3542164       | 0.77  | 0.1411488  | 0.72028        | 0.94       | 0.7149429       | 0.7149429           |
| ile*               | 1.96    | 0.0031686    | 0.0216553        | 1.99  | 0.0033765  | 0.0230725      | 1.38  | 0.1699463  | 0.4738501      | 1.5    | 0.0665351   | 0.3542164       | 0.98  | 0.9471096  | 0.9830758      | 1.92       | 0.0049199       | 0.0049199           |
| leu*               | 1.93    | 0.0031691    | 0.0216553        | 1.81  | 0.0086406  | 0.0442829      | 1.55  | 0.0512193  | 0.209999       | 1.77   | 0.0088087   | 0.1203858       | 1.32  | 0.2105313  | 0.72028        | 1.64       | 0.0240218       | 0.0240218           |
| oxoisopentanoate*  | 1.76    | 0.0036462    | 0.022999         | 1.83  | 0.0024743  | 0.0184518      | 1.64  | 0.0136646  | 0.1120496      | 1.31   | 0.1463558   | 0.3750367       | 1.67  | 0.0094109  | 0.2855326      | 1.82       | 0.0026977       | 0.0026977           |
| gln*               | 0.55    | 0.0043607    | 0.0255414        | 0.63  | 0.0278492  | 0.1085488      | 0.76  | 0.1867839  | 0.4738501      | 0.84   | 0.38161     | 0.6258404       | 0.69  | 0.0672048  | 0.4934755      | 0.8        | 0.2865875       | 0.2865875           |
| guanidinoacetate*  | 0.54    | 0.0068109    | 0.0372327        | 0.82  | 0.3833299  | 0.6687883      | 0.62  | 0.0352568  | 0.1700623      | 0.73   | 0.1419583   | 0.3750367       | 0.72  | 0.1516246  | 0.72028        | 1.15       | 0.5198416       | 0.5198416           |
| carnitine*         | 1.66    | 0.0081634    | 0.0406283        | 1.25  | 0.2440806  | 0.5409355      | 1.56  | 0.0219207  | 0.1356754      | 1.29   | 0.1632407   | 0.4056283       | 1.63  | 0.0146088  | 0.2855326      | 1.62       | 0.0144279       | 0.0144279           |
| tyr*               | 1.65    | 0.0084229    | 0.0406283        | 1.85  | 0.0018745  | 0.0182641      | 1.76  | 0.004079   | 0.0586482      | 1.36   | 0.0968901   | 0.3542164       | 1.28  | 0.1962907  | 0.72028        | 1.41       | 0.0712558       | 0.0712558           |

|                       |      |               |               |      |               |               |      |               |               |      |               |               |      |               |               |       |               |               |
|-----------------------|------|---------------|---------------|------|---------------|---------------|------|---------------|---------------|------|---------------|---------------|------|---------------|---------------|-------|---------------|---------------|
| gly*                  | 0.57 | 0.010996<br>2 | 0.050093<br>8 | 0.64 | 0.042<br>4553 | 0.14505<br>55 | 0.6  | 0.024<br>7937 | 0.13567<br>54 | 0.93 | 0.725<br>2369 | 0.858315<br>8 | 0.61 | 0.027<br>5791 | 0.28553<br>26 | 1.03  | 0.907<br>5403 | 0.907540<br>3 |
| uridine*              | 1.62 | 0.015564<br>8 | 0.065388<br>7 | 1.26 | 0.254<br>6814 | 0.54957<br>56 | 2    | 0.001<br>1668 | 0.03508<br>04 | 1.63 | 0.013<br>614  | 0.159478<br>4 | 1.08 | 0.702<br>3314 | 0.95628<br>38 | 1.47  | 0.055<br>3605 | 0.055360<br>5 |
| pro*                  | 1.62 | 0.015948<br>5 | 0.065388<br>7 | 1.45 | 0.068<br>0407 | 0.20664<br>22 | 1.37 | 0.128<br>1642 | 0.39313<br>2  | 1.36 | 0.116<br>6322 | 0.354216<br>4 | 1.65 | 0.015<br>4208 | 0.28553<br>26 | 1.83  | 0.003<br>6466 | 0.003646<br>6 |
| ala*                  | 1.59 | 0.021537<br>2 | 0.084097<br>7 | 1.84 | 0.004<br>4653 | 0.02816<br>57 | 1.31 | 0.185<br>0624 | 0.47385<br>01 | 1.27 | 0.210<br>7447 | 0.454765      | 1.05 | 0.794<br>9921 | 0.95628<br>38 | 1.71  | 0.010<br>5376 | 0.010537<br>6 |
| pyruvate*             | 1.48 | 0.022814      | 0.085034      | 1.65 | 0.005<br>6176 | 0.03290<br>32 | 1.48 | 0.029<br>3109 | 0.15021<br>83 | 1.24 | 0.197<br>1317 | 0.454765      | 1.1  | 0.589<br>3669 | 0.95292<br>54 | 1.32  | 0.112<br>4355 | 0.112435<br>5 |
| isocitrate*           | 1.55 | 0.027210<br>6 | 0.097011<br>5 | 1.27 | 0.231<br>0166 | 0.53555<br>91 | 1.22 | 0.326<br>6301 | 0.57773<br>35 | 0.97 | 0.888<br>7592 | 0.944894<br>8 | 1.59 | 0.024<br>0846 | 0.28553<br>26 | 1.06  | 0.757<br>9231 | 0.757923<br>1 |
| lactate*              | 1.61 | 0.028875<br>7 | 0.098658<br>6 | 3.16 | 6.6e-<br>06   | 0.00027<br>81 | 1.24 | 0.327<br>3595 | 0.57773<br>35 | 1.6  | 0.029<br>0942 | 0.284771<br>1 | 1.17 | 0.467<br>1827 | 0.89945<br>52 | 1.79  | 0.010<br>9241 | 0.010924<br>1 |
| val*                  | 1.51 | 0.038424<br>7 | 0.125020<br>4 | 1.57 | 0.029<br>1228 | 0.10854<br>88 | 1.45 | 0.073<br>1848 | 0.27277<br>98 | 1.38 | 0.099<br>5825 | 0.354216<br>4 | 1.19 | 0.397<br>656  | 0.88129<br>16 | 1.66  | 0.014<br>0339 | 0.014033<br>9 |
| asp                   | 1.44 | 0.039640<br>6 | 0.125020<br>4 | 1.41 | 0.055<br>9126 | 0.17633<br>98 | 1.18 | 0.348<br>9762 | 0.57773<br>35 | 1.45 | 0.036<br>0764 | 0.284771<br>1 | 0.97 | 0.885<br>247  | 0.95628<br>38 | 1.01  | 0.940<br>1103 | 0.940110<br>3 |
| taurine               | 0.7  | 0.048718<br>1 | 0.147958<br>8 | 0.87 | 0.447<br>9851 | 0.68156<br>23 | 0.85 | 0.381<br>7128 | 0.60193<br>17 | 1.17 | 0.380<br>4769 | 0.625840<br>4 | 0.87 | 0.469<br>3061 | 0.89945<br>52 | 0.74  | 0.100<br>2705 | 0.100270<br>5 |
| kynurenine            | 1.42 | 0.059985      | 0.175670<br>3 | 1.5  | 0.036<br>755  | 0.13103<br>96 | 1.4  | 0.083<br>6536 | 0.29824<br>34 | 1.32 | 0.126<br>3946 | 0.357391<br>5 | 1.42 | 0.072<br>2159 | 0.49347<br>55 | 0.97  | 0.873<br>7608 | 0.873760<br>8 |
| betaala               | 1.45 | 0.066824      | 0.188950<br>5 | 1.23 | 0.317<br>0903 | 0.64609<br>56 | 1.24 | 0.299<br>5782 | 0.57773<br>35 | 1.25 | 0.270<br>682  | 0.510138<br>9 | 1.2  | 0.391<br>0166 | 0.88129<br>16 | 1.37  | 0.123<br>4898 | 0.123489<br>8 |
| glycerophos<br>phate  | 0.64 | 0.089458<br>8 | 0.244520<br>8 | 0.52 | 0.016<br>7874 | 0.07245<br>09 | 0.63 | 0.095<br>5164 | 0.32634<br>76 | 1.01 | 0.957<br>5356 | 0.969357      | 0.94 | 0.809<br>0927 | 0.95628<br>38 | 1.04  | 0.891<br>4283 | 0.891428<br>3 |
| glutarate             | 0.66 | 0.094092<br>7 | 0.248890<br>5 | 0.99 | 0.958<br>0954 | 0.98019<br>88 | 0.81 | 0.400<br>3781 | 0.61868<br>94 | 0.77 | 0.273<br>7331 | 0.510138<br>9 | 1.33 | 0.254<br>7332 | 0.72028       | 0.78  | 0.305<br>0819 | 0.305081<br>9 |
| creatinine            | 1.54 | 0.098954<br>6 | 0.253571<br>1 | 1.01 | 0.968<br>2452 | 0.98019<br>88 | 1.35 | 0.273<br>6941 | 0.54738<br>82 | 0.96 | 0.865<br>7615 | 0.944894<br>8 | 1.36 | 0.251<br>6465 | 0.72028       | 1.05  | 0.840<br>8483 | 0.840848<br>3 |
| methylhistid<br>ine   | 1.36 | 0.103502<br>1 | 0.257187      | 0.96 | 0.824<br>7282 | 0.91630<br>14 | 1.48 | 0.046<br>8146 | 0.20999<br>9  | 1.2  | 0.329<br>2477 | 0.574432<br>1 | 1.27 | 0.223<br>7699 | 0.72028       | 1.28  | 0.200<br>9708 | 0.200970<br>8 |
| hydroxyproli<br>ne    | 1.35 | 0.117221<br>6 | 0.282710<br>9 | 1.29 | 0.187<br>3698 | 0.48013<br>52 | 1.1  | 0.619<br>5232 | 0.79026<br>06 | 0.85 | 0.395<br>0907 | 0.635243<br>9 | 1.45 | 0.059<br>7757 | 0.49016<br>07 | 1.36  | 0.128<br>0557 | 0.128055<br>7 |
| oxoproline            | 0.73 | 0.122632<br>8 | 0.287311<br>2 | 0.89 | 0.582<br>4415 | 0.76308<br>63 | 0.61 | 0.023<br>31   | 0.13567<br>54 | 0.78 | 0.219<br>5247 | 0.461564<br>8 | 1.04 | 0.858<br>9644 | 0.95628<br>38 | 1.29  | 0.231<br>2121 | 0.231212<br>1 |
| azelate               | 4.26 | 0.177473<br>6 | 0.404245<br>5 | 0.99 | 0.992<br>6722 | 0.99267<br>22 | 6.42 | 0.099<br>6082 | 0.32671<br>51 | 2.32 | 0.437<br>8325 | 0.652768<br>5 | 1.8  | 0.592<br>6731 | 0.95292<br>54 | 10.02 | 0.038<br>3527 | 0.038352<br>7 |
| indoxylsulfat<br>e    | 1.26 | 0.214811<br>1 | 0.476067<br>7 | 1.21 | 0.301<br>9977 | 0.63496<br>95 | 1.27 | 0.223<br>7079 | 0.50918<br>14 | 1.1  | 0.590<br>1207 | 0.764401<br>4 | 1.07 | 0.726<br>4501 | 0.95628<br>38 | 1.21  | 0.324<br>2103 | 0.324210<br>3 |
| hydroxybuty<br>rate_3 | 1.25 | 0.236166<br>8 | 0.496774<br>1 | 1.07 | 0.738<br>8596 | 0.85333<br>08 | 1.29 | 0.190<br>6958 | 0.47385<br>01 | 1.16 | 0.436<br>311  | 0.652768<br>5 | 1.06 | 0.755<br>1738 | 0.95628<br>38 | 1.36  | 0.116<br>9592 | 0.116959<br>2 |

|                       |      |               |               |      |               |               |      |               |               |      |               |               |      |               |               |      |               |               |
|-----------------------|------|---------------|---------------|------|---------------|---------------|------|---------------|---------------|------|---------------|---------------|------|---------------|---------------|------|---------------|---------------|
| nndimethylg<br>lycine | 1.25 | 0.236270<br>6 | 0.496774<br>1 | 1.32 | 0.155<br>3875 | 0.43065<br>71 | 1.28 | 0.210<br>0594 | 0.50661<br>39 | 1.38 | 0.095<br>6774 | 0.354216<br>4 | 1.08 | 0.714<br>0729 | 0.95628<br>38 | 1.33 | 0.153<br>6487 | 0.153648<br>7 |
| creatine              | 1.29 | 0.243622<br>5 | 0.499426<br>1 | 1.17 | 0.466<br>4378 | 0.68299<br>82 | 1.11 | 0.626<br>7624 | 0.79026<br>06 | 1.19 | 0.405<br>2188 | 0.638998<br>9 | 1.37 | 0.158<br>0975 | 0.72028       | 2.01 | 0.003<br>0579 | 0.003057<br>9 |
| nacetylaspart<br>ate  | 0.83 | 0.308534<br>3 | 0.617068<br>5 | 0.86 | 0.420<br>9444 | 0.67786<br>78 | 0.58 | 0.006<br>3533 | 0.07037<br>38 | 0.61 | 0.008<br>064  | 0.120385<br>8 | 1.1  | 0.621<br>2288 | 0.95628<br>38 | 0.96 | 0.849<br>0718 | 0.849071<br>8 |
| mucate                | 0.84 | 0.349004<br>6 | 0.68139       | 0.89 | 0.544<br>0174 | 0.75340<br>25 | 1    | 0.989<br>196  | 0.98919<br>6  | 0.98 | 0.910<br>3255 | 0.944894<br>8 | 1.24 | 0.278<br>4016 | 0.76096<br>44 | 0.77 | 0.189<br>8986 | 0.189898<br>6 |
| malate                | 1.19 | 0.416048<br>3 | 0.791124<br>3 | 1.66 | 0.025<br>703  | 0.10538<br>25 | 0.78 | 0.263<br>2299 | 0.53962<br>13 | 1.1  | 0.643<br>4038 | 0.799158<br>5 | 1.15 | 0.533<br>362  | 0.95077<br>57 | 1.71 | 0.018<br>6557 | 0.018655<br>7 |
| trp                   | 1.17 | 0.424505<br>7 | 0.791124<br>3 | 1.1  | 0.624<br>9143 | 0.76482<br>05 | 1.21 | 0.344<br>7414 | 0.57773<br>35 | 1.39 | 0.093<br>4689 | 0.354216<br>4 | 1.16 | 0.471<br>6655 | 0.89945<br>52 | 1.34 | 0.146<br>7392 | 0.146739<br>2 |
| lys                   | 0.86 | 0.439388<br>4 | 0.800663<br>3 | 0.76 | 0.157<br>5575 | 0.43065<br>71 | 1.02 | 0.908<br>2876 | 0.93544<br>41 | 1.05 | 0.815<br>4076 | 0.915937<br>3 | 1.05 | 0.814<br>966  | 0.95628<br>38 | 1.12 | 0.558<br>1157 | 0.558115<br>7 |
| acetylbutyrat<br>e    | 1.15 | 0.462250<br>8 | 0.824012<br>2 | 0.97 | 0.878<br>973  | 0.92560<br>7  | 1.17 | 0.431<br>2181 | 0.64290<br>7  | 1.03 | 0.889<br>3359 | 0.944894<br>8 | 1    | 0.994<br>2161 | 0.99421<br>61 | 1.17 | 0.416<br>9568 | 0.416956<br>8 |
| arg                   | 1.14 | 0.478281<br>6 | 0.834448<br>7 | 1.32 | 0.164<br>2071 | 0.43435<br>44 | 0.91 | 0.623<br>1361 | 0.79026<br>06 | 0.79 | 0.210<br>3075 | 0.454765      | 1.06 | 0.763<br>4363 | 0.95628<br>38 | 1.72 | 0.007<br>9272 | 0.007927<br>2 |
| succinate             | 1.16 | 0.490314<br>2 | 0.837620<br>2 | 1.73 | 0.015<br>2019 | 0.07245<br>09 | 0.99 | 0.954<br>5284 | 0.96631<br>27 | 0.92 | 0.685<br>18   | 0.826246<br>5 | 1.36 | 0.171<br>6971 | 0.72028       | 1.33 | 0.198<br>4308 | 0.198430<br>8 |
| ab                    | 1.12 | 0.557199<br>5 | 0.876742<br>4 | 1.12 | 0.551<br>2701 | 0.75340<br>25 | 1.16 | 0.439<br>7447 | 0.64391<br>19 | 1.27 | 0.202<br>8021 | 0.454765      | 1.12 | 0.546<br>8875 | 0.95292<br>54 | 1.76 | 0.005<br>708  | 0.005708      |
| octanoate             | 0.89 | 0.558246      | 0.876742<br>4 | 0.84 | 0.383<br>0223 | 0.66878<br>83 | 0.84 | 0.407<br>4296 | 0.61868<br>94 | 0.7  | 0.075<br>0137 | 0.354216<br>4 | 0.97 | 0.886<br>1174 | 0.95628<br>38 | 1.35 | 0.147<br>9046 | 0.147904<br>6 |
| betaine               | 1.11 | 0.568208<br>7 | 0.876742<br>4 | 0.84 | 0.339<br>0809 | 0.64661<br>94 | 1.26 | 0.225<br>3792 | 0.50918<br>14 | 1.23 | 0.256<br>5532 | 0.508034<br>2 | 1.04 | 0.829<br>6445 | 0.95628<br>38 | 0.97 | 0.891<br>1876 | 0.891187<br>6 |
| cisaconitate          | 1.11 | 0.577331<br>6 | 0.876742<br>4 | 1.1  | 0.606<br>8133 | 0.76308<br>63 | 0.95 | 0.772<br>3946 | 0.90480<br>51 | 0.8  | 0.203<br>6275 | 0.454765      | 1.29 | 0.175<br>7319 | 0.72028       | 1.11 | 0.563<br>5985 | 0.563598<br>5 |
| adma                  | 0.9  | 0.583500<br>7 | 0.876742<br>4 | 1.28 | 0.203<br>1784 | 0.50486<br>75 | 1.04 | 0.843<br>7136 | 0.93544<br>41 | 1.12 | 0.547<br>1842 | 0.757466<br>2 | 1    | 0.988<br>8073 | 0.99421<br>61 | 0.85 | 0.411<br>2826 | 0.411282<br>6 |
| thr                   | 0.91 | 0.590189<br>5 | 0.876742<br>4 | 0.96 | 0.830<br>8697 | 0.91630<br>14 | 0.98 | 0.912<br>6284 | 0.93544<br>41 | 0.91 | 0.578<br>0688 | 0.764401<br>4 | 1.2  | 0.298<br>7126 | 0.79014<br>3  | 1.11 | 0.534<br>2217 | 0.534221<br>7 |
| decanoate             | 1.1  | 0.608561<br>5 | 0.876742<br>4 | 0.88 | 0.507<br>233  | 0.71712<br>25 | 1.1  | 0.625<br>1906 | 0.79026<br>06 | 0.86 | 0.414<br>6538 | 0.641539<br>9 | 1.13 | 0.532<br>8012 | 0.95077<br>57 | 1.21 | 0.340<br>6765 | 0.340676<br>5 |
| fumarate              | 1.1  | 0.625998      | 0.876742<br>4 | 1.37 | 0.134<br>6424 | 0.39431       | 0.96 | 0.829<br>8361 | 0.93544<br>41 | 1.21 | 0.327<br>0308 | 0.574432<br>1 | 1.05 | 0.828<br>5653 | 0.95628<br>38 | 1.19 | 0.391<br>2086 | 0.391208<br>6 |
| ornithine             | 1.1  | 0.630265<br>6 | 0.876742<br>4 | 1.19 | 0.373<br>8122 | 0.66878<br>83 | 0.97 | 0.896<br>6096 | 0.93544<br>41 | 1.5  | 0.032<br>4277 | 0.284771<br>1 | 0.99 | 0.937<br>3607 | 0.98307<br>58 | 1.16 | 0.434<br>6935 | 0.434693<br>5 |
| cysteinessulf<br>ate  | 1.18 | 0.632172<br>1 | 0.876742<br>4 | 1.13 | 0.711<br>2498 | 0.83317<br>84 | 0.82 | 0.553<br>971  | 0.76992<br>57 | 1.66 | 0.124<br>2991 | 0.357391<br>5 | 0.85 | 0.615<br>611  | 0.95628<br>38 | 1.15 | 0.700<br>8306 | 0.700830<br>6 |
| indole3acetat<br>e    | 1.09 | 0.639002<br>2 | 0.876742<br>4 | 1.62 | 0.016<br>5376 | 0.07245<br>09 | 1.23 | 0.307<br>3066 | 0.57773<br>35 | 0.91 | 0.605<br>9279 | 0.764401<br>4 | 0.99 | 0.964<br>9766 | 0.98910<br>11 | 1.18 | 0.399<br>878  | 0.399878      |

|                      |      |               |               |      |               |               |      |               |               |      |               |               |      |               |               |      |               |               |
|----------------------|------|---------------|---------------|------|---------------|---------------|------|---------------|---------------|------|---------------|---------------|------|---------------|---------------|------|---------------|---------------|
| hippurate            | 0.92 | 0.645325      | 0.876742<br>4 | 1.04 | 0.841<br>6125 | 0.91630<br>14 | 0.97 | 0.864<br>0585 | 0.93544<br>41 | 0.82 | 0.260<br>2126 | 0.508034<br>2 | 1.11 | 0.568<br>7646 | 0.95292<br>54 | 1.02 | 0.913<br>6595 | 0.913659<br>5 |
| prolinebetaine       | 0.92 | 0.652210<br>8 | 0.876742<br>4 | 1.16 | 0.475<br>9311 | 0.68467<br>28 | 0.79 | 0.235<br>9621 | 0.50918<br>14 | 0.95 | 0.800<br>8471 | 0.912849      | 0.91 | 0.654<br>0075 | 0.95628<br>38 | 0.87 | 0.488<br>5932 | 0.488593<br>2 |
| triethanolamine      | 1.1  | 0.670497      | 0.886786<br>4 | 1.04 | 0.849<br>2549 | 0.91630<br>14 | 1.25 | 0.315<br>9778 | 0.57773<br>35 | 1.42 | 0.105<br>0324 | 0.354216<br>4 | 0.76 | 0.247<br>8779 | 0.72028       | 1.22 | 0.359<br>0953 | 0.359095<br>3 |
| terephthalate        | 0.93 | 0.683457<br>3 | 0.889579<br>4 | 0.86 | 0.413<br>5378 | 0.67786<br>78 | 0.88 | 0.524<br>8658 | 0.74205<br>17 | 1.05 | 0.801<br>526  | 0.912849      | 0.95 | 0.798<br>2044 | 0.95628<br>38 | 1.09 | 0.639<br>6332 | 0.639633<br>2 |
| his                  | 0.93 | 0.702879<br>4 | 0.895594<br>9 | 0.91 | 0.588<br>0905 | 0.76308<br>63 | 1.31 | 0.144<br>0646 | 0.42190<br>34 | 1.12 | 0.531<br>0666 | 0.757466<br>2 | 1.19 | 0.341<br>4171 | 0.80709<br>5  | 1.17 | 0.381<br>4172 | 0.381417<br>2 |
| citrulline           | 0.93 | 0.721577<br>4 | 0.895594<br>9 | 0.84 | 0.429<br>8674 | 0.67786<br>78 | 1.12 | 0.593<br>7074 | 0.79026<br>06 | 0.93 | 0.732<br>7086 | 0.858315<br>8 | 0.78 | 0.252<br>2501 | 0.72028       | 1.23 | 0.347<br>2109 | 0.347210<br>9 |
| gammabutyrobetaine   | 0.93 | 0.727405<br>9 | 0.895594<br>9 | 0.79 | 0.235<br>1235 | 0.53555<br>91 | 0.97 | 0.875<br>2962 | 0.93544<br>41 | 0.82 | 0.304<br>3923 | 0.554670<br>4 | 0.87 | 0.496<br>1141 | 0.92457<br>63 | 1.04 | 0.851<br>6508 | 0.851650<br>8 |
| sarcosine            | 0.94 | 0.736869<br>5 | 0.895594<br>9 | 0.85 | 0.378<br>7975 | 0.66878<br>83 | 1.24 | 0.233<br>8017 | 0.50918<br>14 | 1.09 | 0.601<br>8628 | 0.764401<br>4 | 1.05 | 0.788<br>1221 | 0.95628<br>38 | 1.18 | 0.361<br>3233 | 0.361323<br>3 |
| hexanoate            | 0.94 | 0.749889<br>7 | 0.895594<br>9 | 0.91 | 0.634<br>3239 | 0.76492       | 0.77 | 0.177<br>1609 | 0.47385<br>01 | 0.76 | 0.138<br>2603 | 0.375036<br>7 | 1.27 | 0.214<br>9265 | 0.72028       | 1.2  | 0.331<br>8062 | 0.331806<br>2 |
| sdma                 | 0.93 | 0.753610<br>4 | 0.895594<br>9 | 0.81 | 0.333<br>843  | 0.64661<br>94 | 1.23 | 0.359<br>3221 | 0.57773<br>35 | 1.13 | 0.554<br>2436 | 0.757466<br>2 | 0.85 | 0.461<br>1296 | 0.89945<br>52 | 0.89 | 0.611<br>5819 | 0.611581<br>9 |
| pipecolate           | 1.05 | 0.788457<br>9 | 0.908773<br>1 | 0.87 | 0.448<br>8337 | 0.68156<br>23 | 1.19 | 0.358<br>6824 | 0.57773<br>35 | 1    | 0.990<br>6333 | 0.990633<br>3 | 1.21 | 0.322<br>3697 | 0.80709<br>5  | 1.04 | 0.832<br>573  | 0.832573      |
| threonate            | 0.95 | 0.796114<br>6 | 0.908773<br>1 | 0.97 | 0.880<br>7766 | 0.92560<br>7  | 1.27 | 0.251<br>1444 | 0.52804<br>71 | 1.4  | 0.098<br>1808 | 0.354216<br>4 | 0.92 | 0.679<br>2021 | 0.95628<br>38 | 1.01 | 0.943<br>4764 | 0.943476<br>4 |
| ser                  | 1.05 | 0.804609<br>2 | 0.908773<br>1 | 0.91 | 0.672<br>0198 | 0.79863<br>23 | 0.91 | 0.676<br>086  | 0.82744<br>85 | 1.45 | 0.082<br>9508 | 0.354216<br>4 | 0.74 | 0.177<br>6072 | 0.72028       | 1.16 | 0.499<br>3865 | 0.499386<br>5 |
| methylnicotinamide   | 1.05 | 0.809029<br>7 | 0.908773<br>1 | 0.79 | 0.224<br>5929 | 0.53555<br>91 | 1.35 | 0.129<br>4459 | 0.39313<br>2  | 1.02 | 0.934<br>8369 | 0.958207<br>9 | 1.04 | 0.850<br>1093 | 0.95628<br>38 | 0.78 | 0.193<br>5448 | 0.193544<br>8 |
| pelargonate          | 0.95 | 0.868957<br>7 | 0.962634<br>8 | 1.28 | 0.428<br>8221 | 0.67786<br>78 | 1.27 | 0.452<br>1972 | 0.65052<br>93 | 0.85 | 0.583<br>1674 | 0.764401<br>4 | 0.74 | 0.344<br>4918 | 0.80709<br>5  | 1.59 | 0.133<br>5259 | 0.133525<br>9 |
| oacetylcarnitine     | 1.03 | 0.902515<br>5 | 0.962634<br>8 | 0.85 | 0.462<br>637  | 0.68299<br>82 | 1.08 | 0.710<br>8199 | 0.84474<br>25 | 0.97 | 0.902<br>3382 | 0.944894<br>8 | 0.93 | 0.753<br>3601 | 0.95628<br>38 | 1.24 | 0.332<br>4363 | 0.332436<br>3 |
| met                  | 0.97 | 0.903167<br>2 | 0.962634<br>8 | 0.89 | 0.605<br>4908 | 0.76308<br>63 | 0.97 | 0.894<br>332  | 0.93544<br>41 | 0.91 | 0.652<br>971  | 0.799158<br>5 | 1.07 | 0.761<br>834  | 0.95628<br>38 | 1.24 | 0.335<br>6561 | 0.335656<br>1 |
| aminoisobutyrate     | 1.02 | 0.914364<br>8 | 0.962634<br>8 | 0.97 | 0.891<br>7433 | 0.92560<br>7  | 1.11 | 0.613<br>8026 | 0.79026<br>06 | 1.26 | 0.255<br>8316 | 0.508034<br>2 | 1.16 | 0.461<br>9424 | 0.89945<br>52 | 0.88 | 0.548<br>7635 | 0.548763<br>5 |
| trimethylaminenoxide | 0.98 | 0.919395<br>7 | 0.962634<br>8 | 1.11 | 0.567<br>8517 | 0.76308<br>63 | 0.92 | 0.636<br>0634 | 0.79026<br>06 | 0.88 | 0.452<br>2394 | 0.662207<br>8 | 0.98 | 0.923<br>5115 | 0.98307<br>58 | 1.04 | 0.846<br>0522 | 0.846052<br>2 |
| guanidinocinate      | 1.02 | 0.927416<br>4 | 0.962634<br>8 | 0.9  | 0.614<br>1914 | 0.76308<br>63 | 0.97 | 0.900<br>6742 | 0.93544<br>41 | 0.83 | 0.342<br>2994 | 0.584761<br>5 | 0.96 | 0.841<br>5842 | 0.95628<br>38 | 0.9  | 0.592<br>7931 | 0.592793<br>1 |
| citrate              | 1.01 | 0.952853<br>7 | 0.975269<br>3 | 0.83 | 0.323<br>0478 | 0.64609<br>56 | 0.93 | 0.708<br>8063 | 0.84474<br>25 | 0.75 | 0.114<br>9588 | 0.354216<br>4 | 1.11 | 0.592<br>0816 | 0.95292<br>54 | 0.84 | 0.361<br>1277 | 0.361127<br>7 |

|                          |      |           |           |      |           |           |      |           |           |      |           |           |      |           |           |      |           |           |
|--------------------------|------|-----------|-----------|------|-----------|-----------|------|-----------|-----------|------|-----------|-----------|------|-----------|-----------|------|-----------|-----------|
| glycerophosphorylcholine | 1.01 | 0.9633757 | 0.9752693 | 0.95 | 0.8154153 | 0.9163014 | 0.96 | 0.8492481 | 0.9354441 | 0.89 | 0.5519454 | 0.7574662 | 0.97 | 0.8863118 | 0.9562838 | 1.2  | 0.3623529 | 0.3623529 |
| choline                  | 1    | 0.991028  | 0.991028  | 1.28 | 0.4089838 | 0.6778678 | 0.75 | 0.3444388 | 0.5777335 | 1.04 | 0.9035426 | 0.9448948 | 1.15 | 0.6541611 | 0.9562838 | 1.24 | 0.4652082 | 0.4652082 |

Supplementary Table 6c. Sensitivity analysis excluding imputed values for TMCS. The results shown represent logistic regression analysis with covariates of sex and age, as in the original analysis, with imputed values removed from analysis. \* indicates that a metabolite among the top 25 ranked metabolites in this analysis was also present among the top 25 highest ranked metabolites for TMCS in the original analysis.

| Metabolites           | Me<br>tS<br>OR | MetS<br>p-<br>value | MetS<br>FDR<br>p-<br>value | W<br>C<br>O<br>R | WC p-<br>value | WC<br>FDR<br>p-<br>value | TG<br>OR | TG p-<br>value | TG<br>FDR<br>p-<br>value | H<br>DL<br>OR | HDLp<br>-value | HDL<br>FDR<br>p-<br>value | BP<br>OR | BP p-<br>value | BP<br>FDR<br>p-<br>value | Gluc<br>ose<br>OR | Gluc<br>ose p-<br>value | Gluc<br>ose<br>FDR<br>p-<br>value |
|-----------------------|----------------|---------------------|----------------------------|------------------|----------------|--------------------------|----------|----------------|--------------------------|---------------|----------------|---------------------------|----------|----------------|--------------------------|-------------------|-------------------------|-----------------------------------|
| pro*                  | 2.22           | 0                   | 2e-07                      | 1.79             | 6.32e-05       | 0.0007683                | 1.61     | 0.0001991      | 0.0040822                | 1.57          | 0.000723       | 0.0197634                 | 1.34     | 0.0265016      | 0.1552239                | 1.94              | 2e-07                   | 2e-07                             |
| glu*                  | 2.62           | 0                   | 0                          | 2.36             | 0              | 3e-07                    | 2.16     | 0              | 2e-07                    | 1.89          | 1.6e-06        | 0.0001283                 | 1.12     | 0.3523812      | 0.6234465                | 1.57              | 0.0001596               | 0.0001596                         |
| methyl2oxopentanoate* | 2.18           | 0                   | 4e-07                      | 1.46             | 0.0101364      | 0.0433872                | 1.76     | 2.07e-05       | 0.0008476                | 1.51          | 0.0026004      | 0.0333038                 | 1.48     | 0.0043193      | 0.0698039                | 1.83              | 3.2e-06                 | 3.2e-06                           |
| ile*                  | 2.15           | 1e-07               | 2.7e-06                    | 1.89             | 7.5e-05        | 0.0007683                | 1.63     | 0.0004407      | 0.0060229                | 1.62          | 0.0010778      | 0.0220948                 | 1.14     | 0.3469516      | 0.6234465                | 1.52              | 0.0016959               | 0.0016959                         |
| mucate*               | 0.53           | 2e-07               | 2.7e-06                    | 0.54             | 8.1e-06        | 0.0002223                | 0.69     | 0.0016342      | 0.0121819                | 0.73          | 0.008216       | 0.0842138                 | 0.61     | 9.65e-05       | 0.007535                 | 0.72              | 0.0035501               | 0.0035501                         |
| leu*                  | 2.07           | 7e-07               | 9.2e-06                    | 2.08             | 6.7e-06        | 0.0002223                | 1.62     | 0.0007301      | 0.0073111                | 1.56          | 0.002843       | 0.0333038                 | 1.18     | 0.2569146      | 0.5693784                | 1.66              | 0.0002218               | 0.0002218                         |
| cystine*              | 1.84           | 1.1e-06             | 1.23e-05                   | 1.37             | 0.0194199      | 0.0723833                | 1.5      | 0.000857       | 0.0073111                | 1.77          | 1.39e-05       | 0.0005712                 | 1.37     | 0.0110338      | 0.1130964                | 1.43              | 0.0022987               | 0.0022987                         |
| alphaaminoadipate*    | 1.88           | 1.9e-06             | 1.9e-05                    | 1.67             | 0.0004774      | 0.0035589                | 1.43     | 0.0041677      | 0.0201029                | 1.35          | 0.0225745      | 0.1494896                 | 1.26     | 0.0736219      | 0.2982323                | 1.92              | 3e-07                   | 3e-07                             |
| oxoisopentanoate*     | 1.74           | 2.7e-06             | 2.47e-05                   | 1.43             | 0.0049633      | 0.0254368                | 1.43     | 0.0020456      | 0.0139784                | 1.24          | 0.0748419      | 0.2454814                 | 1.19     | 0.1356267      | 0.4448557                | 1.68              | 5.1e-06                 | 5.1e-06                           |
| ala*                  | 1.78           | 1.04e-05            | 8.27e-05                   | 1.81             | 6.67e-05       | 0.0007683                | 1.53     | 0.0008916      | 0.0073111                | 1.29          | 0.0594141      | 0.2205178                 | 1.17     | 0.2397012      | 0.545986                 | 2.1               | 0                       | 0                                 |
| ser*                  | 0.6            | 1.15e-05            | 8.27e-05                   | 0.62             | 0.0001547      | 0.0014096                | 0.68     | 0.0006696      | 0.0073111                | 0.92          | 0.4525585      | 0.6510491                 | 0.72     | 0.0051076      | 0.0698039                | 0.93              | 0.5288011               | 0.5288011                         |
| val*                  | 1.8            | 1.21e-05            | 8.27e-05                   | 1.86             | 4.26e-05       | 0.0006993                | 1.41     | 0.0084696      | 0.0385836                | 1.29          | 0.0626118      | 0.2205178                 | 1.15     | 0.2946837      | 0.5921807                | 1.94              | 4e-07                   | 4e-07                             |



|                     |      |           |           |      |           |           |      |           |           |     |           |           |      |           |           |      |           |           |
|---------------------|------|-----------|-----------|------|-----------|-----------|------|-----------|-----------|-----|-----------|-----------|------|-----------|-----------|------|-----------|-----------|
| gly*                | 0.6  | 1.91e-05  | 0.0001206 | 0.83 | 0.1525352 | 0.3573682 | 0.66 | 0.0003288 | 0.0053929 | 0.7 | 0.0502224 | 0.2059116 | 0.87 | 0.2240926 | 0.545986  | 0.81 | 0.0621333 | 0.0621333 |
| pyruvate*           | 1.65 | 4.21e-05  | 0.0002467 | 1.18 | 0.2039538 | 0.3800956 | 1.58 | 0.000156  | 0.0040822 | 1.3 | 0.0309918 | 0.1494896 | 1.16 | 0.2380181 | 0.545986  | 1.37 | 0.0068198 | 0.0068198 |
| phe*                | 1.65 | 6.54e-05  | 0.0003565 | 1.57 | 0.0013954 | 0.0076283 | 1.26 | 0.0592481 | 0.1428925 | 1.2 | 0.0487467 | 0.2059116 | 1.17 | 0.2107374 | 0.545986  | 1.48 | 0.0011762 | 0.0011762 |
| tyr*                | 1.65 | 6.96e-05  | 0.0003565 | 1.82 | 3.11e-05  | 0.0006379 | 1.2  | 0.132013  | 0.2577396 | 1.1 | 0.3252522 | 0.5674613 | 1.08 | 0.527372  | 0.8027603 | 1.63 | 6.71e-05  | 6.71e-05  |
| guanidinosuccinate* | 0.63 | 0.0005479 | 0.0025038 | 0.62 | 0.0011991 | 0.007023  | 0.74 | 0.019433  | 0.0724322 | 0.6 | 0.0022874 | 0.0333038 | 0.93 | 0.5791409 | 0.8160899 | 0.75 | 0.0205194 | 0.0205194 |
| trp*                | 1.57 | 0.0005496 | 0.0025038 | 1.38 | 0.0280827 | 0.0852881 | 1.39 | 0.010788  | 0.0444043 | 1.2 | 0.1387539 | 0.3670264 | 0.85 | 0.2369036 | 0.545986  | 1.24 | 0.0843374 | 0.0843374 |
| gln*                | 0.67 | 0.0007675 | 0.0033124 | 0.72 | 0.0121765 | 0.0475464 | 0.7  | 0.0023343 | 0.0143    | 0.8 | 0.3396313 | 0.5683625 | 0.63 | 0.0001838 | 0.007535  | 1.13 | 0.269     | 0.269     |
| hydroxybutyrate_3*  | 0.66 | 0.001037  | 0.0042518 | 0.62 | 0.0008483 | 0.0054861 | 0.68 | 0.0024415 | 0.0143    | 0.7 | 0.0463788 | 0.2059116 | 1.13 | 0.3392838 | 0.6234465 | 0.89 | 0.3506441 | 0.3506441 |
| isocitrate*         | 1.42 | 0.0015816 | 0.0061759 | 1.27 | 0.058854  | 0.1664149 | 1.32 | 0.0108303 | 0.0444043 | 1.3 | 0.01407   | 0.1281937 | 1.25 | 0.0492889 | 0.2245385 | 1.2  | 0.0830357 | 0.0830357 |
| hydroxybutyrate_2*  | 1.42 | 0.0016615 | 0.0061929 | 1.05 | 0.6627484 | 0.7991966 | 1.29 | 0.0209631 | 0.0747379 | 1.2 | 0.1129454 | 0.3188162 | 1.21 | 0.0992081 | 0.3536984 | 1.49 | 0.0002462 | 0.0002462 |
| cisaconitate*       | 1.38 | 0.0034581 | 0.0123289 | 1.23 | 0.0961581 | 0.2464052 | 1.2  | 0.0937353 | 0.1970846 | 1.2 | 0.0269692 | 0.1494896 | 1.35 | 0.0100384 | 0.1130964 | 1.26 | 0.0276847 | 0.0276847 |
| lactate*            | 1.38 | 0.0038706 | 0.0132247 | 1.25 | 0.072924  | 0.1993257 | 1.25 | 0.0414458 | 0.1132852 | 1.0 | 0.5055387 | 0.7026131 | 1.27 | 0.0417887 | 0.2119818 | 1.48 | 0.0003441 | 0.0003441 |
| acetylbutyrate      | 0.7  | 0.004617  | 0.0151438 | 0.83 | 0.1836825 | 0.3800956 | 0.84 | 0.1558634 | 0.2904728 | 0.8 | 0.2672545 | 0.5217826 | 0.65 | 0.0016224 | 0.03326   | 0.84 | 0.1329181 | 0.1329181 |
| carnitine           | 1.41 | 0.0048575 | 0.0153199 | 1.13 | 0.3781655 | 0.5742513 | 1.3  | 0.0316049 | 0.0959851 | 1.1 | 0.2243061 | 0.4840289 | 1.33 | 0.0253736 | 0.1552239 | 1.31 | 0.0213755 | 0.0213755 |
| urate               | 1.41 | 0.0082618 | 0.0250913 | 1.38 | 0.0254302 | 0.0802029 | 1.12 | 0.361632  | 0.4861282 | 1.0 | 0.7152676 | 0.8260837 | 1.55 | 0.0012661 | 0.03326   | 1.23 | 0.0910825 | 0.0910825 |
| prolinebetaine      | 0.73 | 0.0085994 | 0.025184  | 0.99 | 0.9423483 | 0.9678252 | 0.77 | 0.0279537 | 0.0914556 | 0.8 | 0.2164228 | 0.4796398 | 0.97 | 0.7924101 | 0.9069173 | 0.87 | 0.2056081 | 0.2056081 |
| decanoate           | 0.77 | 0.010226  | 0.0287393 | 1.05 | 0.6803817 | 0.8085696 | 0.82 | 0.0511519 | 0.135305  | 0.8 | 0.2377087 | 0.4997978 | 0.96 | 0.6948777 | 0.8766149 | 0.82 | 0.0448768 | 0.0448768 |
| citrate             | 0.74 | 0.0105144 | 0.0287393 | 0.88 | 0.3316609 | 0.5332587 | 0.81 | 0.0653865 | 0.1531912 | 0.8 | 0.213209  | 0.4796398 | 0.99 | 0.9211423 | 0.9325144 | 0.98 | 0.8502059 | 0.8502059 |
| hippurate           | 0.74 | 0.0160418 | 0.0424332 | 0.96 | 0.791985  | 0.8921048 | 0.78 | 0.0551021 | 0.1411273 | 0.8 | 0.1720183 | 0.4407968 | 0.9  | 0.4335826 | 0.7255871 | 0.99 | 0.9148568 | 0.9148568 |
| gammabutyrobetaine  | 0.75 | 0.0169674 | 0.043479  | 0.83 | 0.1766324 | 0.3800956 | 0.79 | 0.0567951 | 0.1411273 | 0.9 | 0.4402491 | 0.6446505 | 1.09 | 0.4766899 | 0.7664426 | 0.96 | 0.7365369 | 0.7365369 |
| met                 | 1.27 | 0.0274465 | 0.0682004 | 1.19 | 0.1587971 | 0.3617045 | 1.21 | 0.0694759 | 0.15525   | 1.2 | 0.0303441 | 0.1494896 | 1.2  | 0.0871191 | 0.3247167 | 1.06 | 0.5353396 | 0.5353396 |

|                          |          |               |               |          |               |               |      |               |               |          |               |               |      |               |               |      |               |               |
|--------------------------|----------|---------------|---------------|----------|---------------|---------------|------|---------------|---------------|----------|---------------|---------------|------|---------------|---------------|------|---------------|---------------|
| asn                      | 0.7<br>6 | 0.0338<br>922 | 0.0797<br>843 | 0.<br>6  | 0.0004<br>094 | 0.0033<br>573 | 0.76 | 0.0353<br>354 | 0.1034<br>822 | 0.9      | 0.4378<br>067 | 0.6446<br>505 | 0.73 | 0.0218<br>201 | 0.1552<br>239 | 1.11 | 0.3981<br>662 | 0.3981<br>662 |
| choline                  | 1.3      | 0.0340<br>543 | 0.0797<br>843 | 1.<br>23 | 0.1321<br>154 | 0.3186<br>312 | 1.13 | 0.3188<br>734 | 0.4508<br>21  | 0.9<br>5 | 0.7129<br>24  | 0.8260<br>837 | 1.34 | 0.0235<br>181 | 0.1552<br>239 | 1.14 | 0.2816<br>198 | 0.2816<br>198 |
| betaine                  | 0.7<br>9 | 0.0372<br>135 | 0.0847<br>64  | 0.<br>66 | 0.0008<br>697 | 0.0054<br>861 | 0.87 | 0.2259<br>034 | 0.3632<br>172 | 0.9<br>4 | 0.6155<br>513 | 0.7886<br>751 | 1.02 | 0.8489<br>268 | 0.9069<br>173 | 0.84 | 0.1021<br>13  | 0.1021<br>13  |
| threonate                | 0.7<br>8 | 0.0383<br>76  | 0.0850<br>496 | 0.<br>69 | 0.0060<br>225 | 0.0290<br>496 | 0.83 | 0.1155<br>051 | 0.2367<br>854 | 0.8<br>8 | 0.3003<br>408 | 0.5353<br>901 | 0.78 | 0.0439<br>474 | 0.2119<br>818 | 0.87 | 0.2300<br>136 | 0.2300<br>136 |
| aminoisobutyrate         | 0.7<br>8 | 0.0410<br>745 | 0.0886<br>345 | 0.<br>78 | 0.0882<br>463 | 0.2334<br>256 | 0.7  | 0.0040<br>75  | 0.0201<br>029 | 0.7<br>8 | 0.0534<br>971 | 0.2088<br>932 | 1.06 | 0.6626<br>55  | 0.8490<br>267 | 0.97 | 0.8242<br>875 | 0.8242<br>875 |
| methylnicotinamide       | 1.2<br>8 | 0.0450<br>899 | 0.0948<br>044 | 1.<br>19 | 0.2018<br>415 | 0.3800<br>956 | 1.31 | 0.0289<br>981 | 0.0914<br>556 | 1.2<br>3 | 0.1166<br>401 | 0.3188<br>162 | 0.93 | 0.5977<br>087 | 0.8160<br>899 | 1.2  | 0.1329<br>638 | 0.1329<br>638 |
| creatine                 | 1.2<br>7 | 0.0554<br>638 | 0.1137<br>007 | 1.<br>39 | 0.0214<br>409 | 0.0736<br>947 | 1.3  | 0.0371<br>503 | 0.1050<br>457 | 1.1<br>5 | 0.2806<br>597 | 0.5230<br>477 | 1.14 | 0.3233<br>947 | 0.6167<br>062 | 1.16 | 0.2205<br>363 | 0.2205<br>363 |
| adma                     | 0.8      | 0.0636<br>745 | 0.1273<br>489 | 1.<br>11 | 0.4649<br>452 | 0.6808<br>127 | 0.7  | 0.0030<br>676 | 0.0167<br>694 | 0.8      | 0.0825<br>09  | 0.2505<br>828 | 1.1  | 0.4508<br>252 | 0.7393<br>534 | 0.85 | 0.1533<br>879 | 0.1533<br>879 |
| thr                      | 1.2<br>5 | 0.0678<br>853 | 0.1325<br>38  | 1.<br>1  | 0.4759<br>533 | 0.6847<br>048 | 1.19 | 0.1494<br>495 | 0.2849<br>968 | 1.3<br>3 | 0.0290<br>924 | 0.1494<br>896 | 1.08 | 0.5451<br>125 | 0.8055<br>936 | 1.26 | 0.0457<br>838 | 0.0457<br>838 |
| succinate                | 0.8<br>1 | 0.0739<br>253 | 0.1409<br>738 | 0.<br>71 | 0.0074<br>314 | 0.0338<br>543 | 0.82 | 0.0850<br>456 | 0.1835<br>195 | 0.8<br>6 | 0.2047<br>318 | 0.4796<br>398 | 0.98 | 0.8849<br>366 | 0.9185<br>418 | 1.01 | 0.9542<br>538 | 0.9542<br>538 |
| glucuronate              | 1.2<br>2 | 0.0950<br>145 | 0.1770<br>724 | 1.<br>24 | 0.1054<br>853 | 0.2621<br>149 | 1.18 | 0.1652<br>911 | 0.2946<br>493 | 1.2<br>6 | 0.0645<br>418 | 0.2205<br>178 | 1.2  | 0.1506<br>191 | 0.4574<br>358 | 1.09 | 0.4385<br>681 | 0.4385<br>681 |
| glycerophosphorylcholine | 1.2<br>1 | 0.1009<br>621 | 0.1839<br>753 | 0.<br>88 | 0.3388<br>83  | 0.5343<br>924 | 1.16 | 0.1995<br>742 | 0.3339<br>813 | 1.0<br>8 | 0.4997<br>732 | 0.7026<br>131 | 1.24 | 0.0734<br>745 | 0.2982<br>323 | 0.96 | 0.6774<br>421 | 0.6774<br>421 |
| glycerophosphate         | 1.1<br>9 | 0.1137<br>346 | 0.2027<br>444 | 1.<br>07 | 0.6008<br>137 | 0.7464<br>655 | 1.3  | 0.0187<br>49  | 0.0724<br>322 | 1.2<br>3 | 0.0815<br>494 | 0.2505<br>828 | 1.04 | 0.7226<br>46  | 0.8844<br>324 | 0.82 | 0.0703<br>37  | 0.0703<br>37  |
| uridine                  | 0.8<br>6 | 0.1744<br>223 | 0.3043<br>113 | 1.<br>08 | 0.5305<br>258 | 0.7092<br>57  | 0.9  | 0.3315<br>009 | 0.4530<br>512 | 1.0<br>2 | 0.8737<br>165 | 0.8955<br>594 | 0.88 | 0.2855<br>774 | 0.5921<br>807 | 0.92 | 0.4432<br>149 | 0.4432<br>149 |
| cysteinessulfate         | 1.2      | 0.1889<br>52  | 0.3193<br>246 | 0.<br>92 | 0.5994<br>819 | 0.7464<br>655 | 1.08 | 0.5928<br>102 | 0.7044<br>991 | 1.4      | 0.0218<br>005 | 0.1494<br>896 | 0.98 | 0.9147<br>315 | 0.9325<br>144 | 1.07 | 0.6065<br>328 | 0.6065<br>328 |
| pipecolate               | 1.1<br>7 | 0.1908<br>159 | 0.3193<br>246 | 0.<br>97 | 0.8064<br>285 | 0.8936<br>1   | 0.93 | 0.5546<br>611 | 0.6891<br>244 | 0.8<br>9 | 0.3607<br>126 | 0.5915<br>687 | 1.08 | 0.5501<br>615 | 0.8055<br>936 | 1.36 | 0.0098<br>608 | 0.0098<br>608 |
| terephthalate            | 0.8<br>6 | 0.2098<br>421 | 0.3441<br>41  | 1.<br>07 | 0.5935<br>53  | 0.7464<br>655 | 0.91 | 0.4016<br>562 | 0.5312<br>227 | 0.9<br>9 | 0.9606<br>292 | 0.9724<br>888 | 0.84 | 0.1491<br>383 | 0.4574<br>358 | 0.89 | 0.3144<br>935 | 0.3144<br>935 |
| trimethylaminoxide       | 0.8<br>7 | 0.2199<br>177 | 0.3535<br>932 | 0.<br>92 | 0.4977<br>627 | 0.6918<br>058 | 0.85 | 0.1613<br>197 | 0.2939<br>603 | 0.8<br>5 | 0.1784<br>351 | 0.4433<br>842 | 0.93 | 0.5678<br>39  | 0.8160<br>899 | 1.07 | 0.5435<br>934 | 0.5435<br>934 |
| hydroxyproline           | 1.1<br>3 | 0.3010<br>839 | 0.4747<br>862 | 0.<br>99 | 0.9362<br>399 | 0.9678<br>252 | 1.02 | 0.8945<br>186 | 0.9284<br>877 | 0.9<br>7 | 0.7775<br>163 | 0.8500<br>845 | 1.01 | 0.9395<br>15  | 0.9395<br>15  | 0.99 | 0.9043<br>927 | 0.9043<br>927 |
| taurine                  | 1.1<br>2 | 0.3129<br>439 | 0.4841<br>774 | 1.<br>39 | 0.0105<br>822 | 0.0433<br>872 | 1.13 | 0.2963<br>122 | 0.4338<br>857 | 1.3<br>2 | 0.0215<br>621 | 0.1494<br>896 | 1.14 | 0.2861<br>858 | 0.5921<br>807 | 0.96 | 0.7423<br>042 | 0.7423<br>042 |
| ornithine                | 1.1<br>2 | 0.3448<br>519 | 0.5153<br>365 | 1.<br>02 | 0.9021<br>17  | 0.9678<br>252 | 0.96 | 0.6991<br>464 | 0.7962<br>501 | 1.0<br>2 | 0.8667<br>852 | 0.8955<br>594 | 0.94 | 0.5933<br>707 | 0.8160<br>899 | 1.08 | 0.4882<br>293 | 0.4882<br>293 |

|                       |          |               |               |          |               |               |      |               |               |          |               |               |      |               |               |      |               |               |
|-----------------------|----------|---------------|---------------|----------|---------------|---------------|------|---------------|---------------|----------|---------------|---------------|------|---------------|---------------|------|---------------|---------------|
| his                   | 1.1<br>2 | 0.3456<br>525 | 0.5153<br>365 | 1.<br>19 | 0.2035<br>541 | 0.3800<br>956 | 1.14 | 0.2697<br>272 | 0.4095<br>857 | 1.0<br>5 | 0.6808<br>693 | 0.8091<br>49  | 0.97 | 0.8233<br>662 | 0.9069<br>173 | 1.08 | 0.5260<br>447 | 0.5260<br>447 |
| sdma                  | 0.9      | 0.3591<br>603 | 0.5217<br>143 | 1.<br>04 | 0.7832<br>101 | 0.8921<br>048 | 0.77 | 0.0284<br>933 | 0.0914<br>556 | 0.7<br>5 | 0.0270<br>897 | 0.1494<br>896 | 1.06 | 0.6413<br>932 | 0.8348<br>293 | 1.02 | 0.8482<br>213 | 0.8482<br>213 |
| oxoproline            | 0.9      | 0.3626<br>55  | 0.5217<br>143 | 0.<br>87 | 0.2736<br>673 | 0.4675<br>149 | 0.85 | 0.1785<br>891 | 0.3115<br>81  | 1.0<br>8 | 0.5285<br>346 | 0.7223<br>306 | 1.03 | 0.7941<br>699 | 0.9069<br>173 | 1.1  | 0.3869<br>229 | 0.3869<br>229 |
| asp                   | 1.1      | 0.3869<br>625 | 0.5357<br>192 | 1.<br>17 | 0.1952<br>792 | 0.3800<br>956 | 1.11 | 0.3290<br>012 | 0.4530<br>512 | 1.0<br>3 | 0.8291<br>434 | 0.8829<br>839 | 0.94 | 0.6215<br>293 | 0.8220<br>227 | 1.03 | 0.8096<br>231 | 0.8096<br>231 |
| creatinine            | 0.8<br>8 | 0.3897<br>822 | 0.5357<br>192 | 1        | 0.9834<br>402 | 0.9955<br>814 | 0.79 | 0.1275<br>268 | 0.2550<br>535 | 0.8<br>8 | 0.4354<br>52  | 0.6446<br>505 | 1.22 | 0.2199<br>284 | 0.5459<br>86  | 0.94 | 0.6796<br>011 | 0.6796<br>011 |
| octanoate             | 0.9<br>1 | 0.3919<br>897 | 0.5357<br>192 | 0.<br>85 | 0.1968<br>708 | 0.3800<br>956 | 0.98 | 0.8577<br>731 | 0.9036<br>663 | 1.1<br>1 | 0.3798<br>163 | 0.6106<br>851 | 1.18 | 0.1576<br>256 | 0.4616<br>179 | 0.88 | 0.2545<br>239 | 0.2545<br>239 |
| hexanoate             | 0.9<br>2 | 0.4610<br>588 | 0.6197<br>84  | 1.<br>08 | 0.5409<br>237 | 0.7092<br>57  | 0.86 | 0.1857<br>352 | 0.3172<br>976 | 0.9<br>3 | 0.5658<br>791 | 0.7365<br>411 | 0.98 | 0.8503<br>212 | 0.9069<br>173 | 1    | 0.9798<br>578 | 0.9798<br>578 |
| oxoglutarate          | 1.0<br>8 | 0.4724<br>216 | 0.6248<br>157 | 0.<br>86 | 0.2275<br>573 | 0.4056<br>456 | 1.12 | 0.2894<br>808 | 0.4315<br>895 | 1.1<br>4 | 0.2591<br>541 | 0.5183<br>082 | 1.08 | 0.5236<br>159 | 0.8027<br>603 | 1    | 0.9666<br>519 | 0.9666<br>519 |
| kynurenine            | 1.0<br>8 | 0.5225<br>01  | 0.6800<br>807 | 1.<br>38 | 0.0217<br>793 | 0.0736<br>947 | 1.01 | 0.9640<br>885 | 0.9640<br>885 | 0.9<br>7 | 0.8447<br>992 | 0.8881<br>223 | 1.05 | 0.7221<br>266 | 0.8844<br>324 | 0.86 | 0.1990<br>52  | 0.1990<br>52  |
| oacetylcarnitine      | 1.0<br>7 | 0.5414<br>702 | 0.6937<br>587 | 1.<br>08 | 0.5434<br>203 | 0.7092<br>57  | 1.14 | 0.2667<br>558 | 0.4095<br>857 | 0.9<br>1 | 0.4291<br>698 | 0.6446<br>505 | 1.17 | 0.2020<br>651 | 0.5459<br>86  | 1.14 | 0.2510<br>517 | 0.2510<br>517 |
| methylhistidine       | 1.0<br>7 | 0.5592<br>648 | 0.7029<br>518 | 0.<br>85 | 0.2185<br>219 | 0.3981<br>955 | 0.94 | 0.5669<br>478 | 0.6912<br>07  | 0.8<br>8 | 0.2991<br>676 | 0.5353<br>901 | 1.35 | 0.0193<br>551 | 0.1552<br>239 | 0.98 | 0.8395<br>736 | 0.8395<br>736 |
| triethanolamine       | 1.0<br>8 | 0.5657<br>905 | 0.7029<br>518 | 1.<br>14 | 0.3681<br>667 | 0.5696<br>164 | 0.95 | 0.7095<br>834 | 0.7970<br>663 | 1.0<br>4 | 0.7448<br>091 | 0.8443<br>46  | 1.09 | 0.5286<br>47  | 0.8027<br>603 | 0.98 | 0.8602<br>508 | 0.8602<br>508 |
| fumarate              | 0.9<br>4 | 0.5884<br>871 | 0.7158<br>528 | 0.<br>76 | 0.0385<br>38  | 0.1128<br>613 | 0.95 | 0.6793<br>217 | 0.7845<br>687 | 1        | 0.9900<br>988 | 0.9900<br>988 | 1.02 | 0.8816<br>858 | 0.9185<br>418 | 1    | 0.9974<br>2   | 0.9974<br>2   |
| betaala               | 0.9<br>3 | 0.5936<br>341 | 0.7158<br>528 | 1        | 0.9979<br>192 | 0.9979<br>192 | 0.86 | 0.2340<br>482 | 0.3690<br>759 | 0.8<br>8 | 0.3390<br>235 | 0.5683<br>625 | 1.03 | 0.8340<br>677 | 0.9069<br>173 | 1.13 | 0.3336<br>538 | 0.3336<br>538 |
| lys                   | 1.0<br>6 | 0.6478<br>354 | 0.7698<br>914 | 1.<br>17 | 0.2478<br>711 | 0.4324<br>56  | 1.08 | 0.5207<br>917 | 0.6569<br>988 | 1.0<br>5 | 0.6716<br>016 | 0.8091<br>49  | 0.76 | 0.0334<br>432 | 0.1828<br>229 | 1.03 | 0.8210<br>561 | 0.8210<br>561 |
| arg                   | 0.9<br>6 | 0.7253<br>828 | 0.8452<br>632 | 0.<br>93 | 0.5449<br>17  | 0.7092<br>57  | 0.81 | 0.0700<br>518 | 0.1552<br>5   | 0.9      | 0.4045<br>299 | 0.6379<br>125 | 0.94 | 0.6070<br>913 | 0.8160<br>899 | 1.12 | 0.3135<br>873 | 0.3135<br>873 |
| sarcosine             | 1.0<br>4 | 0.7400<br>809 | 0.8452<br>632 | 1.<br>07 | 0.6281<br>532 | 0.7687<br>845 | 0.91 | 0.4578<br>361 | 0.5959<br>136 | 0.8<br>7 | 0.2586<br>679 | 0.5183<br>082 | 0.96 | 0.7410<br>147 | 0.8935<br>766 | 0.97 | 0.7656<br>861 | 0.7656<br>861 |
| ab                    | 0.9<br>6 | 0.7421<br>823 | 0.8452<br>632 | 1.<br>01 | 0.9108<br>972 | 0.9678<br>252 | 0.89 | 0.3138<br>768 | 0.4508<br>21  | 0.8<br>6 | 0.2164<br>228 | 0.4796<br>398 | 1.03 | 0.8262<br>343 | 0.9069<br>173 | 1.35 | 0.0069<br>37  | 0.0069<br>37  |
| citrulline            | 0.9<br>6 | 0.7532<br>621 | 0.8461<br>3   | 0.<br>74 | 0.0224<br>679 | 0.0736<br>947 | 0.92 | 0.4668<br>591 | 0.5981<br>632 | 1.0<br>6 | 0.6498<br>423 | 0.8091<br>49  | 1.24 | 0.0763<br>766 | 0.2982<br>323 | 1.04 | 0.7246<br>392 | 0.7246<br>392 |
| nndimethylglycin<br>e | 1.0<br>3 | 0.7927<br>607 | 0.8724<br>65  | 0.<br>99 | 0.9442<br>197 | 0.9678<br>252 | 0.98 | 0.8595<br>85  | 0.9036<br>663 | 1.0<br>5 | 0.6641<br>702 | 0.8091<br>49  | 1.21 | 0.1307<br>437 | 0.4448<br>557 | 0.87 | 0.2274<br>901 | 0.2274<br>901 |
| azelate               | 1.0<br>3 | 0.7997<br>099 | 0.8724<br>65  | 0.<br>92 | 0.4976<br>907 | 0.6918<br>058 | 1.02 | 0.8563<br>819 | 0.9036<br>663 | 1.0<br>7 | 0.5400<br>852 | 0.7251<br>696 | 1.02 | 0.8516<br>175 | 0.9069<br>173 | 0.97 | 0.7499<br>186 | 0.7499<br>186 |

|                  |          |               |               |          |               |               |      |               |               |          |               |               |      |               |               |      |               |               |
|------------------|----------|---------------|---------------|----------|---------------|---------------|------|---------------|---------------|----------|---------------|---------------|------|---------------|---------------|------|---------------|---------------|
| nacetylaspartate | 0.9<br>7 | 0.8086<br>261 | 0.8724<br>65  | 0.<br>87 | 0.2862<br>458 | 0.4790<br>235 | 0.99 | 0.9480<br>924 | 0.9630<br>76  | 1.0<br>4 | 0.7665<br>218 | 0.8493<br>89  | 1.13 | 0.3073<br>078 | 0.5999<br>82  | 0.89 | 0.2889<br>727 | 0.2889<br>727 |
| pelargonate      | 1.0<br>2 | 0.8390<br>204 | 0.8935<br>023 | 0.<br>84 | 0.1767<br>205 | 0.3800<br>956 | 1.06 | 0.5731<br>961 | 0.6912<br>07  | 1.0<br>7 | 0.5482<br>99  | 0.7251<br>696 | 1.17 | 0.1932<br>492 | 0.5459<br>86  | 0.94 | 0.5643<br>2   | 0.5643<br>2   |
| indole3acetate   | 0.9<br>8 | 0.9037<br>027 | 0.9500<br>465 | 1.<br>04 | 0.7941<br>908 | 0.8921<br>048 | 0.94 | 0.6570<br>423 | 0.7696<br>781 | 0.9<br>7 | 0.7991<br>892 | 0.8622<br>831 | 0.96 | 0.7916<br>894 | 0.9069<br>173 | 0.96 | 0.7711<br>944 | 0.7711<br>944 |
| indoxylsulfate   | 0.9<br>9 | 0.9193<br>628 | 0.9542<br>753 | 1.<br>02 | 0.8526<br>464 | 0.9322<br>267 | 1.02 | 0.8406<br>97  | 0.9036<br>663 | 1.0<br>5 | 0.6567<br>529 | 0.8091<br>49  | 0.88 | 0.2960<br>904 | 0.5921<br>807 | 0.93 | 0.5242<br>008 | 0.5242<br>008 |
| malate           | 1.0<br>1 | 0.9530<br>853 | 0.9769<br>124 | 0.<br>96 | 0.7266<br>928 | 0.8512<br>687 | 0.88 | 0.2243<br>561 | 0.3632<br>172 | 0.8<br>3 | 0.1118<br>293 | 0.3188<br>162 | 1.33 | 0.0139<br>18  | 0.1268<br>087 | 1.29 | 0.0171<br>709 | 0.0171<br>709 |
| glutarate        | 1        | 0.9764<br>001 | 0.9884<br>544 | 0.<br>89 | 0.3238<br>293 | 0.5310<br>801 | 0.99 | 0.9513<br>312 | 0.9630<br>76  | 1.1<br>3 | 0.2771<br>713 | 0.5230<br>477 | 1.1  | 0.4047<br>699 | 0.6914<br>818 | 0.97 | 0.7844<br>39  | 0.7844<br>39  |
| guanidinoacetate | 1        | 0.9947<br>685 | 0.9947<br>685 | 0.<br>89 | 0.4414<br>985 | 0.6582<br>341 | 1.04 | 0.8045<br>821 | 0.8915<br>639 | 1.0<br>5 | 0.7516<br>738 | 0.8443<br>46  | 1.15 | 0.3573<br>413 | 0.6234<br>465 | 1.06 | 0.6793<br>411 | 0.6793<br>411 |
